# Supplementary material for: Application of CT Radiomics Combined with Machine Learning Methods in Predicting the Recurrence or Metastasis of Gastrointestinal Stromal Tumors
Source: Research Square preprint supplement (doi:10.21203/rs.3.rs-1124517/v1), 2021-12-13
Supplement: Supplementary file 3 [file b214e16b52f30e57c9155e12.xlsx]

## Sheet: V
ID	label	pp_original_firstorder_10Percentile	pp_original_firstorder_90Percentile	pp_original_firstorder_Energy	pp_original_firstorder_Entropy	pp_original_firstorder_InterquartileRange	pp_original_firstorder_Kurtosis	pp_original_firstorder_Maximum	pp_original_firstorder_Mean	pp_original_firstorder_MeanAbsoluteDeviation	pp_original_firstorder_Median	pp_original_firstorder_Minimum	pp_original_firstorder_Range	pp_original_firstorder_RobustMeanAbsoluteDeviation	pp_original_firstorder_RootMeanSquared	pp_original_firstorder_Skewness	pp_original_firstorder_TotalEnergy	pp_original_firstorder_Uniformity	pp_original_firstorder_Variance	pp_original_glcm_Autocorrelation	pp_original_glcm_ClusterProminence	pp_original_glcm_ClusterShade	pp_original_glcm_ClusterTendency	pp_original_glcm_Contrast	pp_original_glcm_Correlation	pp_original_glcm_DifferenceAverage	pp_original_glcm_DifferenceEntropy	pp_original_glcm_DifferenceVariance	pp_original_glcm_Id	pp_original_glcm_Idm	pp_original_glcm_Idmn	pp_original_glcm_Idn	pp_original_glcm_Imc1	pp_original_glcm_Imc2	pp_original_glcm_InverseVariance	pp_original_glcm_JointAverage	pp_original_glcm_JointEnergy	pp_original_glcm_JointEntropy	pp_original_glcm_MCC	pp_original_glcm_MaximumProbability	pp_original_glcm_SumAverage	pp_original_glcm_SumEntropy	pp_original_glcm_SumSquares	pp_original_gldm_DependenceEntropy	pp_original_gldm_DependenceNonUniformity	pp_original_gldm_DependenceNonUniformityNormalized	pp_original_gldm_DependenceVariance	pp_original_gldm_GrayLevelNonUniformity	pp_original_gldm_GrayLevelVariance
16284	0	-81	62	3852424	2.13351	54.5	8.83449	91	1.2	47.903	18	-372	463	25.467	72.645	-2.26101	3852424	0.309488	5275.85	77.6213	385.69	-37.0065	6.71797	0.838004	0.775575	0.532824	1.28613	0.513343	0.774053	0.763066	0.992034	0.953715	-0.365197	0.862795	0.356688	8.72618	0.1665	3.325	0.808219	0.32542	17.4524	2.8051	1.88899	6.05101	32.3973	0.0443798	45.3538	225.926	2.32104
200038	0	4	52	27083447	0.955172	22	7.03467	101	28.0399	15.5754	30	-122	223	9.59164	35.6501	-1.33785	27083447	0.66255	484.689	16.4365	2.84314	-0.330914	0.573785	0.193104	0.49186	0.190786	0.703677	0.155416	0.90499	0.904839	0.994791	0.972786	-0.214694	0.539317	0.188786	4.04244	0.555714	1.52853	0.642002	0.736181	8.08487	1.32868	0.191722	4.58359	2174.39	0.102036	50.0273	14118.9	0.229596
444669	0	-93.1	102.1	3627640	2.45846	75.75	5.79475	129	22.1469	60.1803	44	-296	425	35.9736	86.0427	-1.65205	3627640	0.235035	6912.86	53.0454	348.432	-33.4419	8.18411	1.37849	0.698464	0.768948	1.49854	0.687798	0.697696	0.674988	0.984125	0.92827	-0.350024	0.87433	0.408521	7.16475	0.102534	3.88847	0.747567	0.22226	14.3295	3.14085	2.39065	5.97772	29	0.0591837	29.9154	115.167	2.8551
559107	0	51	89	6944448	0.502608	19	5.40917	106	72.0063	12.2266	75	-7	113	8.07279	73.8013	-1.27395	6944448	0.824262	261.722	8.69325	0.47873	-0.226976	0.18825	0.0822078	0.382963	0.0814572	0.40466	0.0751113	0.959396	0.959346	0.995177	0.983734	-0.185362	0.343824	0.0808005	2.94392	0.797109	0.720312	0.412624	0.89075	5.88784	0.637403	0.0676144	3.72642	204.652	0.160511	45.7974	1050.93	0.0938679
661975	0	46	107	13918921	1.23685	34	3.68932	135	77.5967	19.5794	79	-42	177	13.9069	81.4129	-0.608119	13918921	0.520498	606.815	9.96212	3.00933	-0.109434	0.885105	0.317181	0.470461	0.313661	0.897199	0.215104	0.843756	0.843521	0.981404	0.937385	-0.16797	0.548425	0.310581	3.13365	0.332961	2.15035	0.542609	0.537184	6.2673	1.82659	0.300572	5.3929	99.2905	0.0472812	35.6011	1093.05	0.328966
670057	0	10	85	6194089	1.45913	37	4.12968	137	45.2101	23.467	44.5	-79	216	15.9332	54.702	-0.434027	6194089	0.422202	948.356	11.7883	7.73557	-0.532958	1.4422	0.34994	0.608376	0.315298	0.948244	0.24302	0.848041	0.845815	0.986828	0.948269	-0.258936	0.695879	0.285773	3.39341	0.252953	2.51483	0.618859	0.378862	6.78681	2.12141	0.448034	5.85941	94.0406	0.0454302	39.8206	873.957	0.456959
681473	0	56	115	156087870	1.36255	29	6.9406	209	88.2004	19.5334	93	-89	298	12.5981	92.0909	-1.48183	156087870	0.441376	701.425	19.1332	5.94335	-0.825184	1.17344	0.306317	0.583107	0.295288	0.893508	0.215572	0.854156	0.853459	0.9939	0.963241	-0.235409	0.654686	0.286002	4.34928	0.272092	2.26073	0.622236	0.395904	8.69856	1.93774	0.369939	5.67297	892.648	0.0485003	39.9085	8123.53	0.418832
714524	0	2	55	44108620	1.1445	26	10.9605	90	29.9985	17.8039	35	-189	279	11.2411	39.251	-2.04868	44108620	0.580077	640.731	26.2631	6.6026	-0.784373	0.884609	0.255772	0.547866	0.249275	0.818841	0.191138	0.876433	0.876012	0.993115	0.964505	-0.227313	0.60575	0.243709	5.10938	0.426247	1.90394	0.674874	0.629524	10.2188	1.6447	0.285095	5.1209	1908.21	0.0666507	43.7606	16607.6	0.329186
722570	0	29	77	92816418	1.12547	23	111.558	167	52.7885	18.1239	58	-721	888	10.0842	64.6746	-8.37091	92816418	0.544995	1396.18	278.483	186.117	-11.5109	1.52216	0.355748	0.604498	0.213877	0.771745	0.308358	0.903797	0.902444	0.999071	0.989585	-0.293963	0.66287	0.178606	16.6791	0.439041	1.75105	0.679155	0.625731	33.3581	1.5222	0.469477	4.72644	2851.03	0.128483	48.2206	12093.4	0.663439
738109	1	6	60	137969971	0.951089	34	2.09243	96	32.4487	17.5102	32	-102	198	13.999	38.3165	0.124254	137969971	0.59819	415.238	17.8936	1.39724	0.439218	0.687771	0.181044	0.58327	0.180938	0.673071	0.14671	0.909548	0.909542	0.993038	0.969846	-0.282737	0.630917	0.180851	4.21509	0.457888	1.62877	0.610718	0.646182	8.43017	1.44734	0.217204	4.66974	11023.6	0.117303	39.8896	56214.9	0.218302
741958	0	24	81	227353915	1.2091	29	22.3324	159	53.1813	18.3925	55	-385	544	12.1624	59.1327	-2.21881	227353915	0.490164	668.421	92.6834	11.9624	-1.42074	1.03713	0.26688	0.588707	0.25244	0.829045	0.200874	0.875627	0.875124	0.998169	0.980655	-0.247022	0.647913	0.244393	9.61721	0.329561	2.04063	0.71303	0.49254	19.2344	1.77207	0.326003	5.3667	4104.14	0.0631212	40.6861	31870.4	0.362299
797493	1	18	84	270623570	1.22859	35	5.10501	166	44.3603	21.3475	38	-267	433	14.9451	52.0488	0.210316	270623570	0.501499	741.244	54.3142	4.84781	0.859488	1.12271	0.182491	0.719537	0.172809	0.678185	0.151766	0.915082	0.914558	0.9982	0.984362	-0.397104	0.773916	0.165503	7.35385	0.402007	1.87912	0.739229	0.584126	14.7077	1.679	0.326301	4.56024	17571.5	0.1759	42.7754	50097.3	0.351153
818188	0	-0.4	49.2	171351	1.00173	28	7.61311	64	24.6259	18.0027	26	-83	147	11.8042	35.1104	-1.59539	856755	0.654573	626.306	9.27539	3.96716	-0.457837	0.718069	0.217745	0.52685	0.209341	0.755501	0.173152	0.89673	0.89617	0.98734	0.958412	-0.230866	0.58177	0.201988	3.02491	0.528008	1.65278	0.547349	0.71757	6.04982	1.43924	0.233954	3.35023	22.1511	0.15936	4.93121	90.9856	0.265721
830901	0	29	69	73833646	1.07351	20	5.81571	103	49.6572	12.7022	51	-67	170	8.46258	52.4488	-0.991616	73833646	0.495286	285.048	12.8377	1.16681	-0.284865	0.74281	0.297699	0.426613	0.296375	0.866915	0.205899	0.852033	0.851945	0.988561	0.950636	-0.149981	0.485881	0.295216	3.56741	0.303991	1.91862	0.448196	0.430465	7.13482	1.61716	0.260127	5.44968	1299.86	0.0484298	39.5908	13293.5	0.273347
852973	0	16	61	181560928	0.990371	24	4.08177	116	38.8207	14.2613	39	-92	208	9.8649	42.9256	-0.354141	181560928	0.570851	335.555	10.7216	0.967171	0.186629	0.556849	0.35057	0.226644	0.345608	0.924965	0.224697	0.82802	0.827692	0.986556	0.942517	-0.0734567	0.282042	0.341294	3.2665	0.356693	1.86237	0.3276	0.533853	6.53299	1.49709	0.226855	5.1091	4699.36	0.0476923	35.9116	56248.8	0.233649
883467	1	53	106	181946178	1.18593	27	10.6071	144	80.5156	18.1075	84	-112	256	11.3931	84.5693	-2.00325	181946178	0.555443	669.203	26.4884	7.04244	-0.839366	0.911919	0.292173	0.510568	0.27927	0.876127	0.211132	0.862443	0.861655	0.992161	0.960331	-0.188198	0.561101	0.268661	5.13161	0.392183	2.00871	0.644788	0.596814	10.2632	1.69951	0.301023	5.26369	1443.4	0.0567376	46.7691	14130.5	0.348726
889019	0	-14	90	10209195	1.70396	57	4.11319	113	44.0564	34.3729	54	-107	220	23.7008	62.1862	-1.13704	10209195	0.376507	1926.15	20.7572	24.6469	-4.35129	2.25132	0.372102	0.712078	0.329191	0.984505	0.259271	0.842361	0.839696	0.990132	0.95373	-0.303653	0.771548	0.293491	4.50402	0.267298	2.66456	0.747028	0.46675	9.00803	2.27248	0.655855	5.67474	114.586	0.0434036	48.6101	993.977	0.770064
895576	0	29	72	1647378454	1.02949	23	3.79116	159	51.9849	13.4939	54	-70	229	9.51829	54.7305	-0.288329	1647378454	0.511459	292.997	13.0862	1.06037	-0.255008	0.785106	0.214654	0.57036	0.214412	0.741444	0.166765	0.892835	0.892818	0.9942	0.969374	-0.259412	0.626801	0.214199	3.59772	0.349269	1.76807	0.577432	0.487838	7.19544	1.55215	0.24994	5.0062	53070.7	0.0964984	37.5866	281285	0.253741
953353	0	34	82	394005	0.837602	23	3.33763	93	59.7723	14.0222	63	5	88	9.74626	62.4583	-0.78198	1970025	0.608274	328.314	3.29313	0.790224	-0.458943	0.482178	0.173298	0.463102	0.173298	0.649329	0.140111	0.913351	0.913351	0.96534	0.942234	-0.213891	0.472055	0.173298	1.79326	0.532151	1.30914	0.463102	0.706609	3.58652	1.13584	0.163869	2.9558	22.2079	0.21988	5.04049	61.4356	0.195863
957853	0	29	82	10852855	0.929341	22.25	5.97507	111	59.2181	16.3699	64	-58	169	9.88885	63.4001	-1.46632	10852855	0.634452	512.787	14.4922	2.67348	-0.972087	0.63557	0.184392	0.545494	0.176522	0.686023	0.152364	0.913042	0.912526	0.992972	0.970766	-0.230052	0.548448	0.169719	3.792	0.549789	1.44315	0.5542	0.727518	7.58399	1.2485	0.204991	4.65258	239.95	0.0888705	50.0214	1713.02	0.254721
957896	0	6	109	8828019	1.81926	56	3.72638	133	65.5574	32.7187	75	-118	251	23.478	77.2326	-0.991611	8828019	0.327557	1667.1	25.2189	18.5232	-2.58969	2.41562	0.431761	0.694359	0.38949	1.02745	0.274869	0.811097	0.809345	0.988608	0.945051	-0.291767	0.786837	0.3629	4.97204	0.177171	2.94222	0.727044	0.327108	9.94409	2.49723	0.711845	5.91279	74.1243	0.050084	30.8901	484.784	0.808786
982283	0	37	88	15271204	0.907821	25	3.65852	143	65.0368	15.8952	68	-16	159	10.7935	68.1819	-0.61496	15271204	0.637218	418.979	8.18841	1.26172	-0.428205	0.511946	0.183592	0.467205	0.182536	0.68577	0.149565	0.908908	0.908838	0.989219	0.963528	-0.188982	0.501296	0.181612	2.84714	0.53863	1.46928	0.48245	0.719508	5.69428	1.28144	0.173884	4.74451	262.742	0.0799825	51.5079	2093.26	0.204715
983675	0	20	76	1112000248	1.21554	27	24.4741	193	49.78	18.1273	53	-411	604	11.7268	56.344	-2.6232	1112000248	0.481185	696.604	111.775	12.1012	-1.46497	1.08772	0.247923	0.626304	0.232694	0.799821	0.191862	0.88577	0.885128	0.998547	0.983448	-0.286273	0.686835	0.223006	10.5625	0.326391	1.99771	0.692631	0.460244	21.1249	1.74922	0.333911	5.18299	32690.3	0.0933277	42.5442	168547	0.38339
990256	0	29	77	38288377	1.06627	22	10.0158	110	54.8343	16.3987	59	-105	215	9.71519	59.7775	-1.99843	38288377	0.565703	566.549	22.3927	6.33156	-1.57104	0.857673	0.244892	0.552158	0.239081	0.8	0.185547	0.881422	0.88104	0.993405	0.965949	-0.212823	0.567222	0.234055	4.71586	0.434546	1.75553	0.691137	0.628288	9.43172	1.50477	0.275641	4.99379	692.837	0.0646604	46.7	6061.51	0.318354
997832	0	25	67	724133301	1.05505	22	6.56275	114	47.2984	13.1961	49	-295	409	9.25583	50.2148	-0.814601	724133301	0.493334	284.389	56.3451	1.18997	-0.0919579	0.815246	0.224802	0.567351	0.223924	0.757478	0.172106	0.888161	0.888121	0.99726	0.977615	-0.257193	0.626272	0.223343	7.4965	0.326498	1.80828	0.602265	0.39135	14.993	1.5819	0.260012	5.05925	27491.7	0.0957299	39.428	141676	0.266136
1004428	0	75	151	257360483	1.39079	30	8.49957	182	121.349	25.0411	132	-88	270	13.9377	126.55	-2.10781	257360483	0.523102	1289.38	24.7305	16.9555	-2.7337	1.3975	0.32268	0.618644	0.277767	0.912947	0.243229	0.867607	0.865546	0.991543	0.961072	-0.249636	0.66738	0.247426	4.94585	0.404981	2.18999	0.677729	0.620657	9.8917	1.86038	0.430044	5.27402	1044.62	0.0650041	53.7668	8406.25	0.555221
1006004	0	4.9	74	4671660	1.43916	36	9.01671	103	39.6296	24.3537	46	-153	256	14.9049	52.5766	-1.87908	4671660	0.426603	1193.79	29.5543	18.949	-3.08897	1.64025	0.308927	0.672901	0.2693	0.890822	0.231778	0.871801	0.869313	0.993918	0.966883	-0.335181	0.758593	0.236074	5.4056	0.289519	2.2471	0.721425	0.394918	10.8112	1.9593	0.487294	5.52978	92.329	0.0546325	46.8821	720.959	0.574224
1011746	1	33	88	429185485	1.1824	30	149.517	186	58.5283	18.4538	59	-890	1076	12.3047	66.3741	-8.00546	429185485	0.515872	979.953	387.986	125.9	-6.36359	1.26334	0.300284	0.610144	0.225279	0.785017	0.247345	0.893075	0.89232	0.999399	0.990319	-0.294233	0.688187	0.206247	19.6912	0.368258	1.95477	0.700266	0.548092	39.3825	1.71405	0.390905	5.10785	9778.07	0.10037	44.0652	50256.2	0.485669
1021989	0	-47	54	9726559	1.67385	37	9.9405	78	17.6687	33.4832	35	-325	403	17.9396	51.3761	-2.36462	9726559	0.438362	2327.32	62.9588	64.9705	-8.49752	2.61146	0.418763	0.712086	0.335158	1.02568	0.301345	0.844935	0.840687	0.994995	0.967217	-0.315339	0.773687	0.274761	7.89997	0.318387	2.57294	0.769191	0.53927	15.7999	2.19996	0.757555	5.73834	168.337	0.0456818	52.2884	1615.37	0.986353
1064168	0	28	79	150596370	1.072	28	3.47958	154	54.6702	16.3472	56	-95	249	11.6399	58.3676	-0.26543	150596370	0.511607	417.947	13.3651	1.42117	-0.316739	0.82429	0.202721	0.604647	0.198794	0.71826	0.161889	0.901062	0.900963	0.994556	0.971661	-0.293242	0.668458	0.196977	3.63451	0.367451	1.78519	0.629349	0.523746	7.26902	1.57908	0.256753	5.02107	4363.58	0.0987123	40.5989	22615.6	0.2657
1070735	0	24	68	16604537	1.09175	21	3.74654	107	47.0388	13.6025	48	-36	143	9.02537	50.2725	-0.547419	16604537	0.487922	314.677	6.22983	0.92133	-0.0534288	0.677699	0.386498	0.272564	0.385068	0.943058	0.23078	0.807704	0.807609	0.97729	0.923034	-0.0793926	0.326469	0.383818	2.48132	0.264732	2.04197	0.286405	0.313131	4.96265	1.65089	0.266049	5.40043	352.869	0.0537091	26.6906	3205.64	0.275237
1073455	0	11	54	712789258	0.798227	24	41.6136	478	32.259	14.0544	32	-413	891	9.79142	37.7514	1.62851	712789258	0.700702	384.523	102.977	13.0823	1.20011	0.567811	0.173146	0.531727	0.168206	0.654692	0.143608	0.916555	0.916364	0.999522	0.991601	-0.216004	0.514845	0.165262	10.1429	0.574749	1.37409	0.846714	0.746038	20.2858	1.19946	0.185239	4.08086	90535.9	0.181019	40.5969	350453	0.194728
1087230	0	40	88	1081514161	0.830164	24	13.6178	147	66.2636	15.655	70	-353	500	10.3041	69.6431	-1.91716	1081514161	0.686766	459.296	96.9673	3.71221	-0.923512	0.579538	0.151672	0.583329	0.146968	0.60715	0.129391	0.927216	0.926977	0.99876	0.987782	-0.273893	0.58469	0.143581	9.84177	0.582363	1.36845	0.660237	0.751864	19.6835	1.21304	0.182802	4.0345	42617	0.19112	39.1882	153139	0.203658
1117841	0	30	71	19989796	0.976571	17.25	4.68591	127	53.6022	12.4705	56	-31	158	7.74619	56.24	-0.701345	19989796	0.562815	289.745	7.53059	1.19411	-0.511235	0.658926	0.193066	0.544832	0.192865	0.703697	0.15498	0.903601	0.903588	0.988647	0.961434	-0.240553	0.585409	0.192689	2.72287	0.441281	1.59304	0.548201	0.625203	5.44574	1.39932	0.212998	4.96323	446.045	0.0705767	42.7515	3556.99	0.234937
1123883	0	55	122	256970440	1.38885	34	16.4196	168	91.8145	21.4595	97	-377	545	14.2708	96.4648	-2.22215	256970440	0.428068	875.56	108.338	13.8276	-1.91826	1.4595	0.284994	0.671355	0.254708	0.841623	0.217452	0.876156	0.875339	0.998059	0.980557	-0.320571	0.750749	0.240397	10.3944	0.278049	2.26716	0.717594	0.379375	20.7889	1.9862	0.436124	5.593	1894.49	0.0686037	45.0523	11821.1	0.478992
1147381	0	23	107	237401612	1.58904	49	11.8433	176	69.5496	27.8265	77	-418	594	20.2106	78.1209	-1.53788	237401612	0.391106	1265.73	119.089	20.1005	-1.60704	1.78327	0.329712	0.686534	0.295012	0.922889	0.240069	0.857213	0.85579	0.998075	0.979084	-0.325053	0.788465	0.273493	10.8961	0.240594	2.58276	0.755581	0.416437	21.7923	2.23295	0.528245	5.83685	2139.7	0.0550052	45.2356	15214	0.585466
1175145	0	53.9	121	25625136	1.40786	33	5.1246	156	90.8537	21.3655	96	-56	212	13.8952	95.1568	-1.12646	25625136	0.42308	800.422	19.7779	4.91463	-0.885218	1.16877	0.382711	0.503581	0.360472	0.990098	0.248649	0.823413	0.821988	0.989751	0.948898	-0.169132	0.577387	0.341557	4.42502	0.241543	2.40947	0.540705	0.335965	8.85005	1.99561	0.387871	5.70589	122.927	0.0434369	40.5244	1197.32	0.443459
1180374	1	24	71	945415060	1.10809	23	78.8174	207	49.9608	14.9496	53	-838	1045	9.83648	54.3253	-3.57196	945415060	0.496505	455.155	345.039	13.8873	-0.988973	0.900566	0.253393	0.559653	0.24088	0.802232	0.193146	0.880897	0.880586	0.999479	0.989547	-0.240701	0.623953	0.235443	18.5709	0.32636	1.91034	0.686407	0.455852	37.1417	1.65808	0.28849	5.23614	24007	0.0749411	39.4865	159053	0.310116
1192183	0	34.9	120	71003356	1.75753	36	22.4163	174	74.1892	37.6066	89	-621	795	15.581	101.885	-3.89322	71003356	0.40004	4876.57	229.357	519.813	-38.5959	4.85803	0.842561	0.693127	0.410782	1.1839	0.669241	0.83597	0.828745	0.997247	0.978281	-0.286924	0.769025	0.259609	15.1113	0.258952	2.78256	0.749961	0.421434	30.2226	2.31161	1.42515	5.95518	311.031	0.0454724	55.1791	2736.28	2.04959
1204988	0	29	74	54547888	1.0426	23	3.71906	159	52.7684	14.3825	54	-34	193	9.82524	55.9102	-0.379285	54547888	0.514865	341.453	6.98416	0.996992	-0.2843	0.669898	0.317933	0.355286	0.316848	0.889744	0.213272	0.841757	0.841684	0.98778	0.947218	-0.112664	0.41163	0.315899	2.62605	0.316834	1.90119	0.377354	0.469372	5.2521	1.57896	0.246958	5.40828	801.79	0.0459478	38.2603	8984.4	0.258274
1212126	0	19	68	13335833	1.26439	23	9.63428	92	45.3953	16.4968	50	-118	210	9.80809	51.2616	-2.00404	13335833	0.456861	567.02	20.4723	5.05505	-1.08741	0.980564	0.381438	0.436102	0.371689	0.962672	0.236773	0.815758	0.815131	0.98541	0.938282	-0.148139	0.510932	0.363369	4.50802	0.262699	2.20089	0.622677	0.380203	9.01605	1.80715	0.3405	5.58688	238.816	0.0470573	33.7334	2318.57	0.383009
1225496	0	27	76	191758752	1.11709	25	4.82667	167	52.4643	15.6567	55	-79	246	10.4992	56.3735	-0.812918	191758752	0.503206	425.464	13.1597	1.95091	-0.524825	0.781608	0.318508	0.419696	0.315234	0.896334	0.215145	0.842928	0.84271	0.991405	0.955025	-0.142893	0.485099	0.312376	3.61163	0.31123	2.00196	0.508375	0.470151	7.22326	1.67358	0.275029	5.45525	2849.81	0.0472292	40.6206	30363.5	0.29187
1234619	0	51	84	113567324	0.505179	16	15.7112	161	68.1345	10.6515	69	-182	343	7.04145	69.6731	-1.35212	113567324	0.828086	212.035	35.1884	0.872074	-0.31057	0.244556	0.0924359	0.44932	0.0895588	0.435817	0.0841588	0.955595	0.955494	0.998586	0.990078	-0.216568	0.416773	0.0879272	5.92878	0.762397	0.828595	0.506069	0.870436	11.8576	0.735494	0.084248	3.42631	5903.84	0.252355	34.6617	19373.1	0.0963507
1237656	0	18	80	81836464	1.11554	32	3.05767	124	52.821	18.7931	56	-76	200	13.3932	57.8009	-0.537752	81836464	0.505151	550.889	13.1961	1.79901	-0.495889	0.873151	0.243102	0.564144	0.239971	0.797905	0.183801	0.880533	0.880327	0.990675	0.960079	-0.237079	0.625744	0.237257	3.61089	0.341468	1.93448	0.580498	0.504508	7.22179	1.68172	0.279063	5.33149	1467.05	0.0598916	44.9089	12373.7	0.287135
1242767	0	19	77	5234540	1.057	29	2.89595	97	52.6729	17.9046	58	-16	113	12.8322	57.1086	-0.75679	5234540	0.520963	486.962	7.30449	1.53673	-0.634041	0.754911	0.202749	0.574162	0.201316	0.723027	0.160957	0.899581	0.899485	0.979791	0.949743	-0.258648	0.615229	0.200062	2.67698	0.413563	1.67244	0.576906	0.595158	5.35396	1.46627	0.239415	5.01095	114.868	0.0715688	51.1838	836.145	0.274875
1245987	0	3	60	3371574	1.1685	30	2.69414	88	34.278	17.5448	36	-35	123	12.5359	40.5545	-0.356655	3371574	0.51921	469.686	5.23827	2.13277	0.0744778	0.873677	0.276626	0.518514	0.275976	0.841486	0.197629	0.86212	0.862077	0.972367	0.931038	-0.204052	0.593449	0.275407	2.2558	0.325544	2.04798	0.528429	0.508951	4.5116	1.76894	0.287576	5.46452	99.2732	0.0484259	34.9004	1064.38	0.29704
1259961	0	1	56	86586310	1.08436	30	7.49347	193	27.3944	18.2185	27	-264	457	12.475	36.7075	-0.464891	86586310	0.610669	596.984	50.2608	3.94637	0.0546559	0.735584	0.237597	0.50866	0.229344	0.788068	0.183245	0.886564	0.886136	0.997655	0.979211	-0.201961	0.561186	0.223321	7.0807	0.472694	1.81347	0.563621	0.673056	14.1614	1.56509	0.243295	4.92703	4841.14	0.0753367	48.1788	39241.6	0.280118
1262823	0	25	58	159435477	1.06111	17	42.1427	109	40.1206	12.6049	43	-255	364	7.05928	46.5445	-5.07607	159435477	0.558638	556.726	52.7682	17.0172	-1.87197	0.980077	0.286909	0.541584	0.270803	0.86445	0.210514	0.867117	0.866208	0.996518	0.973063	-0.210023	0.573008	0.258266	7.25223	0.38071	1.83914	0.778833	0.566246	14.5045	1.57022	0.316747	5.14699	4760.29	0.0646822	41.7026	41112.9	0.359177
1273645	0	12	68	4443994	1.32335	29	5.16844	107	41.8432	18.198	46	-67	174	11.9271	48.3626	-1.05469	4443994	0.44655	588.094	11.7639	3.66451	-0.481194	1.0346	0.384852	0.454273	0.365008	0.983621	0.246225	0.82079	0.819481	0.985358	0.939637	-0.151864	0.531512	0.347768	3.40607	0.246402	2.35553	0.503029	0.340633	6.81215	1.93853	0.354862	5.68703	86.9137	0.045744	35.3776	848.445	0.381656
1278252	0	18	60	5883792	1.03978	20	10.6309	111	39.296	14.0665	40	-125	236	8.69193	44.1393	-1.25507	5883792	0.569973	404.098	17.9996	2.35322	0.0661471	0.679851	0.263339	0.438332	0.258212	0.830532	0.194666	0.871709	0.871407	0.992907	0.963202	-0.171312	0.516224	0.254101	4.23031	0.405461	1.79112	0.609932	0.598093	8.46061	1.52728	0.235798	5.23854	149.878	0.0496285	42.551	1721.32	0.263264
1282728	0	32	79	195600617	1.06284	23	24.4748	168	56.9441	15.3975	60	-272	440	9.66481	61.3079	-2.48203	195600617	0.566125	516.028	60.0686	7.61908	-1.26411	0.778285	0.259416	0.496126	0.241517	0.820161	0.199273	0.88168	0.880956	0.997451	0.978171	-0.18705	0.537382	0.230478	7.74202	0.427473	1.78307	0.552498	0.620985	15.484	1.52	0.259425	5.04321	3535.64	0.0679409	48.6135	29461.1	0.300164
1292511	0	71	139	116441611	1.6683	31	43.817	245	99.465	27.3424	104	-601	846	13.375	112.747	-4.90525	116441611	0.408174	2818.69	242.433	373.627	-22.4146	3.06838	0.721492	0.609626	0.423325	1.17324	0.538043	0.816992	0.811739	0.997868	0.978407	-0.214407	0.685421	0.316893	15.5514	0.23836	2.79863	0.670644	0.398662	31.1028	2.28006	0.947468	6.04162	374.903	0.0409282	48.4549	3738.87	1.23732
1312989	0	25	68	272129260	1.21044	19	56.1948	137	47.5259	15.6502	53	-391	528	8.46425	55.2416	-5.58268	272129260	0.48808	792.916	91.7303	51.2104	-5.08052	1.36462	0.266656	0.668398	0.243837	0.829759	0.205316	0.881326	0.880331	0.997829	0.97982	-0.28035	0.678955	0.228919	9.56325	0.338742	1.97286	0.785601	0.498634	19.1265	1.71837	0.407818	5.25742	6481.19	0.0726795	41.4246	43524.5	0.482297
1314750	0	61	126	251691479	1.54999	31	38.4702	229	91.3508	24.3327	96	-566	795	13.0855	101.017	-4.27577	251691479	0.421048	1859.43	207.602	97.4504	-7.64737	2.03165	0.507608	0.590704	0.367788	1.05956	0.36892	0.830695	0.827537	0.998298	0.979929	-0.223518	0.676852	0.310144	14.3952	0.245809	2.58438	0.650365	0.360014	28.7903	2.15302	0.634815	5.9337	1088.52	0.044132	45.4034	10385.1	0.85629
1323991	0	67	120	310289213	1.26862	25	11.0649	162	96.3564	17.6268	102	-143	305	10.8667	99.5819	-2.10351	310289213	0.462892	631.998	30.8573	7.42587	-1.45969	1.15291	0.237251	0.656018	0.227025	0.787758	0.183791	0.888065	0.887503	0.995284	0.971759	-0.304418	0.706184	0.21923	5.53427	0.329981	2.00756	0.675111	0.477743	11.0685	1.76096	0.347541	5.19306	2654.77	0.0848439	42.8916	14483.9	0.40119
1326079	0	61	98	65851397	0.73436	18	17.3191	126	79.2742	12.9209	82	-104	230	7.73184	81.7437	-2.77223	65851397	0.763437	397.634	25.4649	3.50804	-0.431503	0.445178	0.162083	0.460685	0.153018	0.627381	0.137723	0.924934	0.924397	0.995661	0.978299	-0.192799	0.461344	0.145722	5.03926	0.657029	1.227	0.604385	0.805597	10.0785	1.06596	0.151815	4.32966	1123.26	0.113979	45.2143	7523.67	0.179963
1337858	0	41	93	48776976	1.00972	27	6.73121	122	67.555	17.1319	70	-71	193	11.2015	71.4483	-1.31681	48776976	0.635045	541.186	15.2001	3.85189	-0.759585	0.735799	0.198859	0.571743	0.193807	0.714235	0.159681	0.90393	0.903602	0.992393	0.967819	-0.255004	0.608545	0.189473	3.88147	0.51122	1.68585	0.630107	0.70332	7.76294	1.48127	0.233665	4.8488	819.656	0.085783	43.969	6067.85	0.255874
1351189	1	29	77	4178876095	1.10889	30	22.6146	160	49.8338	16.3018	46	-508	668	12.0148	54.0936	-1.22201	4178876095	0.492163	442.711	155.019	5.39364	-0.0840983	1.0022	0.135764	0.761031	0.131303	0.563451	0.117868	0.934974	0.934781	0.9994	0.991809	-0.468765	0.795948	0.128423	12.442	0.390438	1.6661	0.808443	0.498696	24.884	1.52839	0.284492	4.2259	346738	0.242792	32.9679	702872	0.298594
1356550	1	14	76	3851811058	1.04541	30	13.1069	181	39.2729	19.3748	34	-825	1006	13.1463	46.637	0.438987	3851811058	0.576421	632.649	334.711	6.37949	1.08158	0.969095	0.134343	0.75627	0.131137	0.560274	0.116448	0.934805	0.934695	0.999697	0.994045	-0.44447	0.76954	0.129456	18.2894	0.484318	1.59891	0.773922	0.66604	36.5788	1.46131	0.27586	3.98179	470441	0.265645	33.1827	1.02081e+06	0.283045
1361626	0	32	77	1592641886	0.939467	23	5.64628	122	56.4584	13.8702	58	-323	445	9.81045	59.1387	-0.629386	1592641886	0.564372	309.841	75.5759	1.27566	-0.499921	0.713528	0.17943	0.597966	0.178626	0.671349	0.146095	0.910808	0.910765	0.998224	0.983767	-0.290592	0.634854	0.178028	8.68575	0.42173	1.59081	0.696602	0.595274	17.3715	1.40952	0.223239	4.58972	64874.3	0.142462	38.9255	257004	0.226593
1362528	1	29	78	138297599	1.18369	24	59.4829	579	55.2498	16.7505	56	-211	790	10.3208	61.9205	3.37073	138297599	0.513287	781.602	44.9423	66.9062	3.83841	1.26957	0.333513	0.583268	0.286671	0.899062	0.248219	0.861685	0.860609	0.998863	0.984197	-0.20771	0.595115	0.266886	6.68642	0.347312	2.03022	0.756171	0.528797	13.3728	1.72531	0.400771	5.36922	1906.67	0.0528601	43.0357	18514.3	0.422937
1363052	0	30	77	40410656	1.08117	22	7.21155	189	55.2678	15.0413	58	-105	294	9.54501	59.0354	-0.616591	40410656	0.540267	430.651	22.3992	2.4942	-0.474619	0.781879	0.233828	0.537697	0.227511	0.780745	0.180249	0.887182	0.88687	0.995343	0.971645	-0.230062	0.599129	0.223029	4.71827	0.401365	1.81479	0.563677	0.59015	9.43654	1.57613	0.253927	5.1621	717.127	0.061848	43.3309	6264.4	0.277268
1364555	0	21.9	67	2352482	1.11771	21.25	4.10075	83	47.58	14.4641	52	-22	105	9.49858	51.126	-1.11247	2352482	0.490106	350.012	6.85938	1.51905	-0.46589	0.840336	0.223928	0.577069	0.223928	0.760231	0.172198	0.888036	0.888036	0.977607	0.944018	-0.255012	0.632602	0.223928	2.58942	0.346354	1.82621	0.57826	0.497722	5.17885	1.60229	0.266066	5.39005	43.8889	0.0487654	38.501	441.096	0.294691
1372081	1	47	93	153078318	0.821949	23	6.52644	130	70.1925	14.8536	72	-121	251	9.88105	72.9309	-1.03258	153078318	0.710556	391.927	24.4367	1.74561	-0.34373	0.462479	0.162898	0.475926	0.16116	0.637895	0.136204	0.919695	0.919593	0.995606	0.977007	-0.202435	0.501985	0.159778	4.93576	0.605441	1.36954	0.526551	0.771724	9.87152	1.20342	0.156344	4.36764	3573.93	0.124181	44.7768	20449.8	0.178547
1381170	0	9	69	4448340	1.29104	30	4.65537	88	43.0825	18.8283	48	-65	153	12.5391	49.6433	-1.1549	4448340	0.444194	608.348	12.2754	3.46042	-0.766871	1.03382	0.324735	0.519324	0.319599	0.913422	0.220118	0.841057	0.840714	0.980989	0.936251	-0.189498	0.593639	0.315104	3.47816	0.267028	2.19316	0.573099	0.383876	6.95631	1.85716	0.339639	5.61928	81.1263	0.0449453	39.1497	801.77	0.378682
1388627	0	35	67	11726374	0.929267	15	9.45899	102	52.91	10.4861	56	-82	184	6.48422	54.9044	-1.5921	11726374	0.576301	215.021	14.0653	1.33663	-0.580095	0.61324	0.205316	0.495811	0.202358	0.729094	0.163079	0.899296	0.899117	0.992129	0.966343	-0.203686	0.529199	0.199939	3.73673	0.457431	1.54586	0.511173	0.64247	7.47346	1.33796	0.204639	4.89299	264.285	0.0679397	44.5564	2241.81	0.22704
1395310	0	13	81.1	9507784	1.23471	35	7.12875	101	51.9894	22.7233	59	-166	267	14.9088	60.1259	-1.59553	9507784	0.499649	912.234	32.2403	7.05542	-1.79815	1.03668	0.278581	0.567741	0.25275	0.856675	0.212804	0.877787	0.876203	0.994494	0.96876	-0.228151	0.604951	0.231465	5.66128	0.406325	1.89508	0.612179	0.603865	11.3226	1.60784	0.328815	4.97005	185.084	0.0703743	57.3056	1314.08	0.422909
1396807	0	47	104.6	81672713	1.13323	29	2.92784	151	78.5778	17.8899	81	8	143	12.4734	81.7027	-0.428464	81672713	0.557672	500.868	4.27616	3.12593	-0.107323	0.924318	0.197106	0.648326	0.196836	0.707889	0.156679	0.901627	0.901609	0.98841	0.960642	-0.334562	0.720869	0.196599	2.02344	0.413786	1.89257	0.698086	0.62096	4.04688	1.69426	0.280356	5.17739	953.179	0.0779059	40.5798	6823.12	0.279049
1399065	0	46	93	96091732	0.815197	23	4.89083	141	70.3913	14.5509	72	-66	207	9.8401	72.933	-0.753128	96091732	0.708025	364.293	15.5796	1.51518	-0.284527	0.457912	0.148088	0.508589	0.147122	0.601256	0.12575	0.926594	0.926535	0.994313	0.975502	-0.234558	0.533908	0.146333	3.93727	0.614363	1.33009	0.557486	0.777647	7.87454	1.17986	0.1515	4.37245	2281.86	0.126314	43.3931	12790.5	0.171734
1424968	0	35	70	101421253	0.840456	14	9.52873	97	54.9025	10.8514	58	-107	204	6.66078	56.96	-1.80929	101421253	0.628145	230.154	22.9901	1.44147	-0.638837	0.555095	0.151969	0.567663	0.150592	0.611178	0.128607	0.924926	0.924842	0.994167	0.974934	-0.270198	0.574375	0.149462	4.78427	0.540156	1.33003	0.629276	0.714513	9.56853	1.17602	0.176766	4.24002	4790.72	0.153254	41.0235	19635.8	0.200744
1424991	0	19	93	6289377	1.27046	32	2.84001	120	58.3183	20.9116	60.5	-16	136	14.3804	64.1148	-0.339222	6289377	0.490557	709.68	7.87343	3.6529	-0.439897	1.05603	0.217378	0.657207	0.216207	0.750429	0.169158	0.892092	0.892014	0.987234	0.956798	-0.321123	0.728194	0.215182	2.76831	0.367866	2.03919	0.66983	0.565456	5.53662	1.81827	0.318351	5.40846	84.2941	0.0550942	40.8448	750.553	0.345963
1427411	0	-76.1	65	3081166	1.86747	42.5	7.3375	85	16.0347	41.8126	35	-262	347	20.5005	64.0954	-2.11809	3081166	0.367996	3851.11	49.5685	161.299	-20.1875	4.69215	0.685276	0.732926	0.472912	1.22371	0.437005	0.79516	0.784758	0.989853	0.949722	-0.344589	0.823552	0.322615	6.96873	0.213904	2.92874	0.786366	0.374713	13.9375	2.48358	1.34436	5.8361	34.648	0.0461973	41.8613	275.997	1.64274
1427708	0	29	73	247474290	1.07607	22	20.1205	130	51.9842	14.1105	54	-320	450	9.3952	55.4646	-1.84619	247474290	0.509324	373.963	74.1719	3.35287	-0.625359	0.796777	0.272019	0.489788	0.264999	0.834139	0.198889	0.868347	0.868137	0.997317	0.975957	-0.189187	0.549701	0.261454	8.60469	0.331159	1.88735	0.575754	0.484846	17.2094	1.61337	0.267199	5.32979	4643.7	0.0577252	39.8011	40972.5	0.284842
1430096	0	12	86.1	9025520	1.6453	36	11.4133	328	53.8792	27.1533	51	-48	376	15.255	68.5623	2.19601	9025520	0.395044	1797.83	7.96483	76.1566	9.20715	2.88111	0.563246	0.674218	0.429155	1.17385	0.37171	0.804998	0.798679	0.991603	0.953736	-0.247014	0.73327	0.336943	2.71736	0.214369	2.90438	0.714297	0.340307	5.43472	2.40287	0.861088	5.77869	88.8667	0.0462847	36.491	758.485	0.817901
1432007	0	22	70	8405200	1.08057	24	4.55705	105	47.993	14.7717	50	-71	176	10.1343	51.6558	-0.761639	8405200	0.490393	364.988	12.545	1.05395	-0.157715	0.777187	0.277618	0.473067	0.274439	0.849159	0.199776	0.86331	0.863099	0.989348	0.954336	-0.175146	0.537005	0.271657	3.52422	0.302811	1.91668	0.477199	0.398645	7.04844	1.63232	0.263701	5.5589	142.672	0.0452928	39.9985	1544.74	0.274671
1432505	0	35	75	162920216	1.00563	19	149.66	163	55.1909	14.0176	58	-754	917	8.2737	61.2551	-8.51215	162920216	0.586734	706.155	314.143	63.1403	-4.54849	1.00372	0.235023	0.613815	0.190342	0.722344	0.197718	0.909173	0.908322	0.999424	0.991021	-0.279622	0.631656	0.173827	17.7186	0.463693	1.6264	0.719558	0.648939	35.4373	1.42118	0.309686	4.74021	5018.59	0.115583	43.502	25476	0.399734
1435079	0	8	67	2168783381	0.858301	30	7.1811	191	30.8493	18.3728	23	-654	845	13.0255	38.445	0.834641	2168783381	0.648781	526.338	231.199	2.60617	0.74668	0.670675	0.0894033	0.764324	0.088	0.427821	0.0813514	0.956143	0.956111	0.999725	0.995372	-0.499493	0.749134	0.0874278	15.2005	0.586321	1.25249	0.795965	0.74658	30.4009	1.16266	0.19002	3.22031	566487	0.386059	26.9598	951996	0.199164
1437046	0	32	72	7822298	0.963287	19	5.5494	98	54.0632	12.6082	57	-36	134	8.27456	56.6784	-1.18756	7822298	0.568832	289.608	7.57447	1.4268	-0.625049	0.630347	0.209114	0.498801	0.208183	0.733612	0.164121	0.896063	0.896001	0.979132	0.948001	-0.203672	0.530357	0.207369	2.73293	0.454358	1.56634	0.513361	0.640745	5.46587	1.35499	0.209865	5.02634	154.981	0.0636473	51.5155	1385.11	0.242139
1442088	0	1.9	68	701394	1.27897	40	2.81126	100	34.4703	21.7708	35.5	-48	148	16.0214	43.5392	-0.156518	701394	0.46786	707.46	5.59013	2.90738	-0.21241	1.02964	0.324613	0.519609	0.320231	0.901481	0.217174	0.840615	0.840322	0.980982	0.9361	-0.205003	0.612629	0.316398	2.32659	0.265947	2.25062	0.586945	0.407257	4.65318	1.91781	0.338562	5.40017	21.0919	0.0570051	27.432	173.108	0.347619
1445251	0	-51.1	83.1	13242494	2.1464	68	8.52652	128	16.995	48.7165	30	-331	459	27.7475	74.4365	-2.11683	13242494	0.290668	5251.96	64.9691	321.982	-31.2906	6.16793	0.752641	0.768592	0.464372	1.24845	0.508458	0.807627	0.796181	0.992827	0.959847	-0.384112	0.871693	0.286655	7.97561	0.177203	3.28007	0.801835	0.289242	15.9512	2.77546	1.73014	6.19693	108.822	0.0455321	57.8088	694.695	2.12958
1451238	0	9	64	145174146	0.972883	36	2.46035	133	35.7656	18.3385	36	-80	213	14.5218	41.7567	0.133065	145174146	0.565421	464.442	10.9426	1.28736	0.474285	0.745148	0.143962	0.675635	0.143114	0.590054	0.122693	0.928583	0.928528	0.99447	0.976168	-0.372873	0.70492	0.142386	3.28516	0.454945	1.53715	0.68449	0.627926	6.57033	1.38995	0.222278	4.23863	17362.8	0.208538	37.3631	47076.9	0.230352
1451790	0	7	74	89573442	1.43294	28	92.0083	104	43.3287	23.6671	52	-836	940	12.3755	60.0501	-6.50362	89573442	0.440031	1728.64	341.498	308.196	-15.4889	2.2029	0.369211	0.707586	0.28301	0.901334	0.285773	0.865848	0.864423	0.999104	0.986681	-0.30337	0.733476	0.255308	18.4673	0.300027	2.26953	0.796748	0.462825	36.9345	1.95931	0.643028	5.54026	1492.48	0.0600836	45.2646	10930.4	0.821861
1459650	1	15	65	1967267237	0.983675	29	24.1188	577	39.0023	16.2	38	-450	1027	11.6667	44.3782	0.0119862	1967267237	0.567859	448.245	106.067	7.69584	0.637691	0.810574	0.161376	0.667458	0.155902	0.624944	0.135899	0.922747	0.92256	0.999635	0.992924	-0.355139	0.695354	0.152885	10.291	0.448059	1.58638	0.751807	0.623637	20.582	1.42463	0.242987	4.24882	211789	0.212021	35.9794	567238	0.253212
1459916	0	18	66	11747373	1.12502	24	4.2925	100	42.7844	14.9884	45	-55	155	10.0138	47.0574	-0.695227	11747373	0.495467	383.895	11.5305	1.35099	-0.00796494	0.740286	0.359801	0.34498	0.357612	0.929484	0.225894	0.821559	0.821413	0.986179	0.94045	-0.108368	0.417628	0.355697	3.3816	0.277932	2.07264	0.394589	0.402609	6.7632	1.70631	0.275022	5.43088	283.037	0.0533529	27.5678	2628.45	0.284975
1461863	0	-24.6	70	3783500	1.71871	44	8.75765	117	27.2	31.7977	36	-234	351	18.6292	53.6394	-1.97388	3783500	0.382801	2137.35	38.7257	47.3024	-6.30446	2.46886	0.488147	0.655577	0.382803	1.07937	0.326748	0.824358	0.819067	0.992687	0.958592	-0.309005	0.767043	0.307146	6.18287	0.233395	2.70062	0.694923	0.376867	12.3657	2.3066	0.739251	5.76903	58.054	0.0441475	43.6826	503.383	0.931267
1465184	0	20	69	3951382	1.14075	25	4.37955	93	46.8039	15.3686	50	-72	165	10.4874	50.8193	-0.858209	3951382	0.477849	391.996	12.6397	1.33547	-0.285919	0.805029	0.297226	0.458566	0.289948	0.880521	0.210245	0.856222	0.855754	0.982649	0.942251	-0.164435	0.525033	0.283745	3.53728	0.298558	1.97828	0.465851	0.416051	7.07456	1.66818	0.275564	5.42783	72.9948	0.047709	35.8729	731.108	0.299314
1465719	0	23	73	20655995	1.25267	23	32.5321	104	48.5697	19.9097	56	-345	449	9.93827	60.4643	-4.54407	20655995	0.508793	1296.91	74.5605	69.6913	-8.04887	1.74321	0.290571	0.706815	0.249562	0.853031	0.225703	0.880954	0.879232	0.997163	0.977607	-0.302043	0.69625	0.22345	8.61375	0.393539	1.94568	0.784523	0.587013	17.2275	1.69274	0.508445	5.161	369.585	0.0654134	50.0221	2874.68	0.64962
1467802	0	52	100	27061709	1.00731	22	27.9452	134	74.824	17.1569	78	-234	368	9.34124	80.2699	-3.71931	27061709	0.666464	844.626	49.4994	23.0994	-2.6071	0.949219	0.20389	0.634267	0.168877	0.683665	0.174484	0.920615	0.919029	0.996935	0.981605	-0.307181	0.645273	0.145389	7.02231	0.578533	1.53884	0.685626	0.7537	14.0446	1.35689	0.288277	4.52333	556.369	0.132469	49.4344	2799.15	0.366912
1470976	0	42	90	8811901	0.720183	20	4.02791	111	69.7201	14.1785	73	0	111	9.1608	72.209	-1.00797	8811901	0.723186	353.248	3.7177	0.914615	-0.327525	0.365302	0.121398	0.494616	0.121398	0.529276	0.106081	0.939301	0.939301	0.98786	0.96965	-0.243941	0.501714	0.121398	1.91222	0.665004	1.11747	0.542211	0.809788	3.82445	0.996075	0.121675	4.2421	193.382	0.114427	43.9086	1222.18	0.146096
1472162	0	31	62	164681259	1.1269	15	16.0464	112	46.4799	10.7986	49	-175	287	6.45188	49.2152	-2.43074	164681259	0.48237	261.755	30.0435	1.89549	-0.251275	0.77408	0.344117	0.383291	0.341622	0.914652	0.221371	0.829593	0.829438	0.993124	0.957331	-0.12954	0.455333	0.339547	5.47137	0.273903	2.03655	0.537456	0.333888	10.9427	1.68827	0.279549	5.52102	3365.96	0.0495066	32.1415	32796.3	0.296691
1473973	0	22	72	44549349	1.17337	23	4.36866	118	49.1144	15.514	52	-42	160	10.0014	53.294	-0.915843	44549349	0.47657	428.03	6.68	1.93357	-0.496042	0.846189	0.318419	0.450448	0.314758	0.890789	0.213664	0.843231	0.842987	0.981334	0.93717	-0.162763	0.513142	0.311555	2.55889	0.293342	2.05092	0.478127	0.432076	5.11779	1.72253	0.291152	5.47046	759.442	0.0484184	39.4931	7475	0.31583
1477467	0	23.1	65	74952	1.16865	28.25	2.65817	73	44.5625	15.5898	46	-1	74	11.4615	48.3968	-0.661165	374760	0.470703	356.434	6.55478	1.20004	-0.268234	0.790389	0.324679	0.408456	0.324679	0.903192	0.217368	0.83766	0.83766	0.967532	0.91883	-0.136442	0.479713	0.324679	2.53723	0.284083	2.01239	0.413756	0.405868	5.07446	1.68771	0.278767	3.60141	4.9375	0.154297	3.99609	15.0625	0.308594
1486746	0	70	101	275215405	0.907312	14	108.734	132	84.5969	12.6657	88	-538	670	6.0884	88.2414	-7.42618	275215405	0.684655	629.901	171.396	41.5446	-2.88433	0.777518	0.204346	0.578357	0.183035	0.701584	0.169696	0.910996	0.910371	0.998973	0.987878	-0.237968	0.561016	0.172508	13.0864	0.565966	1.47833	0.817313	0.741652	26.1727	1.28044	0.245466	4.41924	4638.48	0.131234	43.4869	24199.1	0.311943
1487427	0	20.8	47	90052	0.366368	11	4.74467	52	34.5217	8.092	37	-4	56	5.44291	36.1262	-1.07902	450260	0.889519	113.351	4.13541	0.14169	0.0714603	0.105188	0.0913328	0.0635714	0.0913328	0.439714	0.0828589	0.954334	0.954334	0.990867	0.977167	-0.0415273	0.136836	0.0913328	2.03272	0.820496	0.627259	0.131426	0.904122	4.06543	0.535926	0.0491303	2.60722	15.087	0.218652	4.66583	61.3768	0.0571309
1489963	0	12.9	123	6844643	2.06566	60.75	16.7283	156	66.0867	44.1473	82.5	-473	629	24.8096	95.5311	-3.03142	6844643	0.30134	4758.74	145.666	351.569	-27.5028	4.61587	0.976516	0.653465	0.550873	1.35675	0.652586	0.772413	0.762016	0.99525	0.964873	-0.247708	0.758202	0.361077	12.0313	0.164433	3.25638	0.77896	0.261305	24.0626	2.62403	1.3981	5.99784	33.3333	0.0444444	40.8752	226.005	2.00636
1494716	0	3	73	6029987	1.59364	28	16.4718	106	36.2236	27.879	46	-280	386	12.544	60.4528	-3.23583	6029987	0.409325	2342.39	54.3501	98.8911	-11.6958	2.77551	0.47644	0.697603	0.360789	1.05201	0.333554	0.835592	0.830923	0.994359	0.964909	-0.321364	0.768173	0.288906	7.33303	0.254047	2.51979	0.754636	0.361014	14.6661	2.17999	0.812987	5.6313	75.96	0.0460364	41.4721	675.385	1.04467
1500024	0	0	54	1007533	1.17319	27	11.3777	95	29.7744	18.8017	34	-160	255	11.7411	40.1504	-1.94752	1007533	0.577928	725.538	26.0174	6.58082	-0.836483	0.832766	0.325191	0.431756	0.293541	0.918394	0.236986	0.85806	0.856369	0.991376	0.958609	-0.156093	0.508097	0.269868	5.08825	0.422118	1.94912	0.584054	0.628007	10.1765	1.63384	0.289489	5.3183	26.5968	0.0425549	48.486	361.205	0.365993
1502812	0	39	72	58449273	0.939849	17	6.96124	120	55.4783	10.7327	56	-66	186	7.19644	57.3355	-0.813203	58449273	0.5717	209.514	13.8025	1.08177	-0.475453	0.647444	0.225513	0.482579	0.2235	0.760613	0.173495	0.888504	0.88844	0.991355	0.962792	-0.196119	0.530178	0.222434	3.70094	0.409996	1.64943	0.503079	0.5921	7.40189	1.422	0.218239	5.01279	1310.38	0.0736994	40.908	10164.8	0.226923
1503291	1	32	61	3425667269	1.07137	14	276.362	171	46.4477	9.64029	48	-813	984	6.14243	49.3345	-9.96008	3425667269	0.497731	276.5	339.729	20.6026	-1.13823	0.80146	0.33378	0.410331	0.323735	0.90004	0.223652	0.839093	0.83891	0.999247	0.985302	-0.135096	0.45753	0.32012	18.4286	0.289631	1.96131	0.715068	0.395552	36.8571	1.63252	0.28381	5.43133	72835.6	0.0517488	33.1639	700549	0.305556
1509373	0	0	39	116813792	0.668209	20	21.6982	99	17.6638	12.7226	18	-353	452	8.38493	25.2434	-1.77236	116813792	0.779879	325.22	80.0471	3.00593	-0.479762	0.360833	0.133222	0.456925	0.129861	0.559646	0.115821	0.935564	0.9354	0.998684	0.988219	-0.191182	0.443287	0.127501	8.94372	0.69084	1.11329	0.612382	0.827537	17.8874	0.978099	0.123514	3.68092	36905.1	0.20132	38.2172	142963	0.145057
1516912	0	32	80	9708892	0.920061	24	3.35315	115	58.2093	14.8376	60	-11	126	10.1931	61.2259	-0.546418	9708892	0.59002	360.288	7.76801	1.0308	-0.509647	0.566858	0.183166	0.508198	0.183166	0.682292	0.148739	0.908417	0.908417	0.989226	0.963367	-0.216073	0.536795	0.183166	2.76983	0.49138	1.47451	0.513075	0.674548	5.53965	1.29134	0.187506	4.89349	182.896	0.0706161	49.5652	1528.15	0.216413
1517124	0	18	72	7352895	1.04925	30	2.72847	94	49.8182	16.9978	55	-18	112	12.3892	53.9633	-0.689178	7352895	0.506802	430.183	7.0504	1.26972	-0.468845	0.805833	0.1841	0.626409	0.184024	0.684454	0.149291	0.908001	0.907996	0.981594	0.953998	-0.30846	0.670763	0.183957	2.62578	0.386411	1.68451	0.629051	0.545701	5.25155	1.50013	0.247483	5.0615	188.892	0.0748088	42.5977	1279.68	0.265453
1518746	0	19	61	11721907	1.27428	17	26.9101	95	39.4661	16.2	44	-264	359	7.83475	48.9604	-3.93463	11721907	0.488537	839.549	53.2487	19.6774	-2.41239	1.20839	0.357077	0.53416	0.327135	0.956395	0.246358	0.840889	0.839403	0.994563	0.963971	-0.196565	0.593067	0.305811	7.28255	0.301891	2.15244	0.677958	0.46834	14.5651	1.8234	0.391367	5.5148	231.571	0.0473561	36.3051	2388.95	0.479101
1519088	0	30	71	124075132	1.04948	21	3.78306	115	50.2686	12.772	51	-32	147	8.7441	52.9165	-0.305439	124075132	0.496395	273.233	6.55112	0.917824	-0.130185	0.751838	0.273393	0.46622	0.273104	0.830668	0.19472	0.863496	0.863477	0.983923	0.945389	-0.178498	0.525346	0.272851	2.53604	0.306495	1.87632	0.469816	0.403118	5.07208	1.6016	0.256308	5.39948	2423	0.0546829	36.8413	21995.2	0.261844
1532594	0	28	61	226411395	1.16899	16	35.2738	127	43.824	12.1913	47	-261	388	6.69223	48.7355	-4.184	226411395	0.492566	454.607	54.4789	9.66345	-1.08756	0.992596	0.284202	0.552213	0.277513	0.859166	0.204293	0.862298	0.861909	0.996541	0.972308	-0.221315	0.609101	0.272212	7.36897	0.311201	1.99706	0.765238	0.452606	14.7379	1.71439	0.3192	5.38869	5803.29	0.060879	38.6519	46953.8	0.357812
1538216	0	20	63	63464355	1.26867	18	19.4749	93	43.4949	14.8217	48	-197	290	8.08571	49.4344	-3.12793	63464355	0.457303	551.949	29.7666	8.94977	-1.42456	1.09811	0.325366	0.540394	0.320316	0.902475	0.217542	0.84066	0.840347	0.991229	0.95433	-0.211223	0.610128	0.316121	5.43813	0.26962	2.16227	0.736012	0.33924	10.8763	1.83622	0.355869	5.64602	1228.14	0.0472908	36.9499	11876.2	0.402152
1543713	0	47	79	36049623	0.58727	15	14.0609	113	63.4736	10.0489	64	-117	230	6.55921	64.9903	-1.4364	36049623	0.776304	194.845	24.0192	1.10596	-0.428008	0.296199	0.110564	0.45175	0.10864	0.497048	0.0984766	0.945961	0.945872	0.997023	0.984512	-0.200022	0.421783	0.107327	4.8962	0.713429	0.926058	0.556562	0.839684	9.79239	0.815692	0.101691	3.90974	1425.66	0.167037	42.7836	6625.76	0.121771
1546152	0	-96	71	8949768	2.29539	63.25	6.32278	167	4.8381	51.3746	21	-310	477	29.5265	72.988	-1.68796	8949768	0.272153	5303.84	62.2343	251.177	-25.4603	6.43269	0.873496	0.746487	0.560959	1.33709	0.511607	0.764944	0.750504	0.993026	0.955181	-0.356882	0.863693	0.348543	7.79987	0.148436	3.57443	0.777874	0.293347	15.5997	2.97491	1.82655	6.24074	77.7833	0.0462996	47.17	457.218	2.2115
1553338	0	25	60	55256806	0.952315	18	5.44739	91	42.5325	11.0566	43	-88	179	7.60836	44.9197	-0.579197	55256806	0.561756	208.764	10.9981	0.896803	0.26979	0.595274	0.293893	0.338443	0.293324	0.856944	0.203208	0.853432	0.853395	0.982722	0.941354	-0.113952	0.389485	0.292833	3.30496	0.364219	1.76178	0.464669	0.539287	6.60993	1.46595	0.222292	5.22741	1375.31	0.0502213	39.646	15383.7	0.227049
1565083	0	1	71	163577216	1.38771	31	14.9682	111	43.3196	22.7557	52	-277	388	14.6764	53.6126	-2.42097	163577216	0.440718	997.727	56.3641	24.7508	-3.71557	1.6828	0.249859	0.739682	0.236603	0.809898	0.192016	0.883726	0.883006	0.996969	0.976457	-0.358214	0.77756	0.226593	7.4837	0.314732	2.18651	0.794725	0.490806	14.9674	1.93366	0.483164	5.35826	4535.14	0.0796897	43.0287	25081.3	0.541339
1572521	1	41	92	160519850	0.856379	26	3.3015	117	68.5763	15.8972	71	-45	162	11.0825	71.4364	-0.623767	160519850	0.671335	400.447	8.31396	1.5795	-0.443937	0.592898	0.141468	0.614763	0.140228	0.583159	0.12099	0.930093	0.93001	0.9917	0.971996	-0.324699	0.644662	0.139142	2.86376	0.554543	1.43385	0.654909	0.731049	5.72751	1.28786	0.183592	4.42641	4448.88	0.141436	37.6618	21116.8	0.184037
1573744	0	0.7	42.3	31169	0.413817	25.5	1.90314	45	20.5208	12.8941	21.5	-8	53	9.98615	25.4824	-0.077177	155845	0.847222	228.25	3.80462	0.218391	-0.143721	0.119321	0.0781815	0.208752	0.0781815	0.388562	0.0713601	0.960909	0.960909	0.984364	0.973939	-0.127332	0.227266	0.0781815	1.9479	0.829889	0.552704	0.263805	0.908812	3.8958	0.474523	0.0493756	2.1255	13.2917	0.27691	4.78472	40.6667	0.0763889
1573794	0	45	98	48491802	1.00058	27	9.50869	133	73.9696	17.8709	80	-102	235	11.3611	78.0508	-1.95617	48491802	0.655429	620.433	24.8233	4.04875	-0.610237	0.660433	0.208191	0.513996	0.189158	0.722538	0.170924	0.908358	0.907315	0.994469	0.973306	-0.226232	0.560366	0.174665	4.97093	0.553947	1.60492	0.569565	0.737066	9.94186	1.38403	0.217156	4.64876	852.876	0.107145	49.5373	5217.21	0.262995
1575137	0	30	87	36139137	0.920231	23	5.07014	128	65.4284	17.5186	72	-74	202	10.8798	69.4621	-1.32459	36139137	0.648815	544.104	14.9177	2.19666	-0.758994	0.589848	0.11854	0.661132	0.113772	0.518581	0.105386	0.943888	0.943591	0.995481	0.98115	-0.3711	0.662528	0.109794	3.84704	0.613535	1.28851	0.701977	0.773327	7.69409	1.15922	0.177097	3.96246	1702.25	0.22727	46.0646	4859.62	0.22361
1578370	0	68	103	140877650	0.821584	19	129	122	85.8056	11.8536	88	-414	536	7.91359	87.7636	-6.78662	140877650	0.678462	339.844	124.723	7.79502	-0.239993	0.561635	0.19981	0.471785	0.17622	0.671781	0.167254	0.913805	0.913551	0.99866	0.986547	-0.215982	0.518414	0.169819	11.1639	0.543951	1.40922	0.617316	0.721095	22.3278	1.2285	0.190361	4.51076	2196.39	0.120087	41.9782	12409.1	0.216858
1578520	0	26.5	71.1	185864	0.993651	23.75	2.72065	84	50.7812	14.8955	54.5	4	80	10.3144	53.8899	-0.447502	929320	0.504395	325.39	2.65852	0.696203	-0.202026	0.653888	0.30211	0.366554	0.30211	0.872675	0.207482	0.848945	0.848945	0.939578	0.899297	-0.114135	0.416397	0.30211	1.60319	0.314519	1.825	0.366554	0.452136	3.20638	1.52289	0.239	3.53362	9.8125	0.15332	3.42871	32.2812	0.247803
1583916	0	19	77	1006035587	1.0807	39	17.4466	145	46.926	20.3786	47	-618	763	16.1651	52.8855	-0.997574	1006035587	0.492258	594.828	209.276	6.30461	-0.25174	1.0061	0.105865	0.809287	0.0986015	0.467396	0.0958049	0.951556	0.95134	0.99959	0.994222	-0.55675	0.831128	0.0949925	14.4586	0.414375	1.53456	0.849275	0.49592	28.9172	1.42955	0.277991	3.73646	120714	0.335596	28.4129	177065	0.291398
1586538	0	-37.6	89	8033552	1.7672	35	10.6443	119	42.4908	42.8789	63	-327	446	17.7678	80.0077	-2.66114	8033552	0.449934	4595.77	73.6413	298.735	-31.8043	5.29448	0.700913	0.755845	0.417637	1.20451	0.512043	0.829442	0.81874	0.993355	0.964044	-0.333574	0.799265	0.248934	8.51408	0.355837	2.67161	0.792538	0.581858	17.0282	2.25152	1.49885	5.62971	60.1442	0.0479237	66.0576	564.667	1.94181
1591296	0	19	65	14347126	1.21264	20	6.22015	86	45.2202	14.6167	50	-63	149	9.07386	49.5016	-1.53338	14347126	0.461933	405.544	12.4437	2.30822	-0.525209	0.880056	0.341346	0.438285	0.339161	0.914628	0.22113	0.830784	0.830638	0.979959	0.932241	-0.154293	0.515213	0.337248	3.50839	0.270313	2.11619	0.549483	0.380428	7.01678	1.76945	0.305351	5.5386	278.625	0.0475875	33.3401	2704.62	0.335146
1601176	1	16	77	499576449	1.18867	33	14.9554	150	48.4501	19.3555	52	-468	618	13.6607	54.6143	-1.49259	499576449	0.476817	635.317	133.026	5.35678	-0.750793	1.01012	0.226894	0.631964	0.216437	0.762784	0.178268	0.893108	0.892711	0.998853	0.985611	-0.301255	0.696587	0.210417	11.5252	0.329046	1.95312	0.693008	0.445969	23.0504	1.71819	0.309253	5.14663	16215.9	0.096817	43.0784	79862	0.336397
1601803	0	49	84	71937042	0.572217	17	14.412	109	66.8586	12.0668	70	-94	203	7.14869	69.2748	-2.50434	71937042	0.803439	328.933	15.3495	2.15292	-0.668605	0.317721	0.0941924	0.534032	0.0889638	0.438516	0.0860473	0.956359	0.956041	0.996423	0.985295	-0.247496	0.445613	0.0846742	3.9107	0.770719	0.820818	0.595876	0.875446	7.8214	0.723706	0.102978	3.37704	4015.5	0.267879	41.0376	12043.6	0.141895
1609883	0	3	69	4045173	1.30263	37	3.32525	95	38.0716	21.193	42	-63	158	15.1182	46.3247	-0.619575	4045173	0.447048	696.532	11.584	2.97554	-0.399554	1.05947	0.319417	0.534637	0.310025	0.911532	0.220391	0.846515	0.845927	0.981386	0.938304	-0.199561	0.610088	0.302166	3.37613	0.262498	2.2437	0.539075	0.366452	6.75226	1.90529	0.344723	5.5546	90.0759	0.0477856	35.8975	842.685	0.36968
1611112	0	21	70	2080153	1.02489	25	2.8841	80	49.1854	14.7431	53	-11	91	10.5286	52.4897	-0.699627	2080153	0.506751	335.963	7.02968	0.913682	-0.337383	0.703491	0.25206	0.469723	0.250906	0.804755	0.186266	0.874739	0.874662	0.974847	0.937331	-0.182065	0.521783	0.249897	2.62994	0.350731	1.76556	0.472159	0.510165	5.25987	1.51073	0.238888	5.24229	37.4768	0.0496382	38.7464	382.597	0.255761
1614731	0	76	124	264385933	1.06801	24	8.91279	156	102.901	15.4103	107	-137	293	10.2416	104.947	-1.57192	264385933	0.530317	425.097	32.1408	3.52166	-1.03529	0.90266	0.186639	0.656518	0.181085	0.690028	0.152712	0.91033	0.910012	0.996282	0.97744	-0.328314	0.692947	0.176724	5.65347	0.413167	1.7159	0.669595	0.592918	11.3069	1.5216	0.272325	4.84002	2744	0.11431	40.8709	12730.3	0.290102
1616573	0	17	54	118802484	0.994833	18	79.4301	659	36.172	15.529	36	-297	956	7.58416	51.0871	4.60264	118802484	0.671131	1301.48	51.6259	286.759	14.8177	1.90538	0.294201	0.731704	0.201565	0.758354	0.252152	0.908496	0.90672	0.999282	0.990582	-0.293689	0.64157	0.166534	7.15703	0.559844	1.60112	0.846838	0.737466	14.3141	1.38341	0.549895	4.37736	6919.11	0.152002	47.4925	30549.9	0.582531
1620556	0	6	126.6	15708698	2.09063	51	8.70675	404	67.3247	39.7246	62	-138	542	21.8898	90.3347	1.60129	15708698	0.320467	3627.75	25.8413	186.876	17.0373	4.87573	1.03432	0.649834	0.519411	1.36574	0.748738	0.7984	0.785759	0.993308	0.962564	-0.304671	0.830372	0.288802	4.98801	0.202256	3.43939	0.743693	0.396365	9.97601	2.75775	1.47751	6.18453	82.2831	0.0427445	59.4556	616.899	1.49315
1622020	0	28	84	92308497	1.03513	30	3.21841	126	58.4737	17.3793	61	-66	192	12.4388	62.3629	-0.473907	92308497	0.548411	469.958	13.9238	1.65905	-0.484122	0.811144	0.15611	0.676774	0.154108	0.62054	0.131438	0.923278	0.923146	0.994012	0.974363	-0.36836	0.718257	0.152374	3.70945	0.434004	1.6498	0.713235	0.609135	7.41891	1.48669	0.241814	4.73051	3127.46	0.131766	38.2772	13016.5	0.250917
1626014	0	47	102	28053838	1.12733	32	5.93748	117	78.3693	17.852	84	-151	268	13.1476	81.3897	-1.05042	28053838	0.566131	482.535	37.2594	2.63712	-0.0075676	0.775713	0.247101	0.514859	0.242812	0.799987	0.186321	0.879135	0.878984	0.995079	0.969701	-0.214004	0.591548	0.240433	6.09319	0.412217	1.90667	0.556653	0.619317	12.1864	1.65765	0.255703	5.29447	214.424	0.0506314	40.5542	2397.56	0.281064
1633308	0	22	65	30560141	1.16189	20	5.70205	94	45.6444	13.7	49	-76	170	8.68706	49.268	-1.26411	30560141	0.472966	343.923	12.2573	1.64257	-0.281942	0.791542	0.359832	0.372851	0.356779	0.930169	0.226331	0.822117	0.821915	0.978888	0.928746	-0.122481	0.444316	0.354125	3.48559	0.265407	2.09278	0.448301	0.336976	6.97117	1.72581	0.287843	5.49601	636.36	0.0505449	29.7951	5954.65	0.306563
1634952	0	-9	58	1330828	1.35729	31	3.94076	76	29.2024	20.7305	35	-69	145	13.982	39.5687	-1.04699	1330828	0.468687	712.903	10.269	4.90894	-0.522496	1.17393	0.298498	0.593631	0.29574	0.875662	0.208086	0.852589	0.852406	0.98249	0.940944	-0.251197	0.682661	0.293327	3.17013	0.290821	2.28223	0.652039	0.481285	6.34026	1.97714	0.368107	5.68303	40.0753	0.0471474	35.3498	398.384	0.399154
1635585	0	31.4	313.6	7509660	2.77049	94	6.05807	627	126.384	89.3644	78	-24	651	50.2684	175.076	1.78405	7509660	0.225889	14678.8	22.8846	1721.43	121.61	19.872	5.9263	0.537902	1.63666	2.39578	3.06065	0.562764	0.510857	0.973146	0.905935	-0.232144	0.8395	0.347303	4.4018	0.0756803	5.02456	0.633981	0.233439	8.8036	3.59298	6.44956	5.64004	21.2694	0.0868138	24.6453	55.3429	5.87515
1636782	0	44	85	16436786	0.751528	17	15.8307	251	66.5422	13.9976	69	-84	335	7.65581	70.3622	-0.174368	16436786	0.747858	522.979	15.394	4.77497	-0.128366	0.482577	0.176854	0.452888	0.136797	0.595999	0.157598	0.937223	0.935526	0.997367	0.985218	-0.212909	0.466513	0.111136	3.91375	0.704487	1.10686	0.530967	0.835716	7.82749	0.948362	0.164858	3.9687	552.172	0.166317	51.5135	2482.89	0.220142
1637201	0	59	107	79408714	1.10437	25	4.52575	124	85.4167	15.316	89	-5	129	10.5733	87.6766	-1.09457	79408714	0.54612	391.19	10.6081	2.04232	0.0768562	0.787092	0.260388	0.502007	0.260098	0.814099	0.18942	0.869999	0.86998	0.984688	0.94799	-0.214853	0.587931	0.259845	3.23671	0.362312	1.92196	0.604764	0.552935	6.47342	1.66043	0.26187	5.34493	567.642	0.0549508	34.0857	5641.42	0.270738
1637517	0	35	70	79541740	0.933823	16	5.91016	144	53.9196	11.1421	56	-35	179	7.00209	56.0709	-1.13338	79541740	0.580573	236.619	7.55185	1.17132	-0.521011	0.61087	0.22035	0.467898	0.219639	0.753193	0.170196	0.890299	0.890252	0.987051	0.956096	-0.184157	0.506131	0.219016	2.73023	0.438132	1.60041	0.476217	0.62439	5.46046	1.37748	0.207805	4.91775	1768.85	0.0699149	42.1713	14688.5	0.226106
1642197	0	-12	53	25493242	1.28581	33	7.56136	97	22.9079	20.9634	27	-197	294	13.758	36.3441	-1.41597	25493242	0.528639	796.123	25.3007	8.00528	-1.07186	1.08543	0.271466	0.596554	0.266901	0.842163	0.197819	0.867298	0.867006	0.992683	0.961952	-0.254097	0.665429	0.263022	5.00968	0.377449	2.1223	0.693544	0.59085	10.0194	1.84558	0.339225	5.38634	1005.45	0.0520959	41.3641	10202.7	0.384126
1643087	0	-11	73	21207139	1.50139	39	3.78564	104	39.6978	25.9437	49	-91	195	17.5101	51.6647	-1.11314	21207139	0.395577	1093.33	11.9803	10.5236	-2.30765	1.71231	0.291882	0.706851	0.284574	0.87432	0.20843	0.858922	0.858444	0.988833	0.952744	-0.31548	0.760817	0.278259	3.40952	0.261565	2.38899	0.734362	0.423023	6.81904	2.08216	0.501047	5.7434	382.436	0.0481355	41.4544	3142.86	0.561672
1645398	0	29	60	30180404	1.04587	14	6.2671	86	46.1266	9.83877	48	-52	138	6.1382	48.0627	-1.22976	30180404	0.497892	182.356	12.1251	0.891929	0.0218278	0.739273	0.286979	0.440307	0.286677	0.852247	0.201388	0.856712	0.856692	0.983124	0.942675	-0.158209	0.501632	0.286413	3.46583	0.29809	1.897	0.447929	0.383282	6.93165	1.60878	0.256563	5.41585	683.988	0.0523527	34.5463	6504.96	0.260515
1650232	0	35	78	742038277	1.13267	21	144.948	191	54.6233	17.9476	60	-976	1167	8.86752	67.9356	-9.28381	742038277	0.57955	1631.53	471.828	374.556	-17.5406	1.76562	0.373751	0.640502	0.22263	0.803	0.322864	0.900608	0.898741	0.999379	0.991292	-0.276786	0.652935	0.180865	21.7136	0.464576	1.79604	0.712433	0.657057	43.4272	1.54417	0.534843	4.69235	21583.7	0.134243	48.0074	93180.1	0.760739
1650718	0	18.4	65	27672814	1.182	23	7.27998	93	43.5769	15.1932	47	-122	215	9.85996	48.1723	-1.38122	27672814	0.473985	421.629	19.7949	2.36812	-0.307123	0.876593	0.309964	0.476241	0.308709	0.881084	0.210371	0.845854	0.845771	0.988088	0.948578	-0.179358	0.554842	0.307611	4.43319	0.27893	2.07009	0.574005	0.367242	8.86637	1.75771	0.296639	5.60037	566.038	0.0474665	35.7851	5652.27	0.317236
1655349	0	30	78	37926765	1.1535	23	5.68059	198	55.7415	15.644	57	-43	241	9.83152	59.76	0.00326891	37926765	0.515682	464.141	7.50947	2.70423	-0.229644	0.850776	0.26209	0.527707	0.259824	0.824865	0.192169	0.870466	0.870315	0.989938	0.95675	-0.219344	0.605535	0.257841	2.71333	0.355726	1.97605	0.612219	0.542774	5.42667	1.70769	0.278216	5.37168	537.52	0.050614	40.4634	5476.54	0.297093
1655375	0	9	68	8147564	1.26555	29	3.43781	104	42.7983	18.016	47	-52	156	12.1891	48.5964	-0.749778	8147564	0.44916	529.922	11.9973	2.49852	-0.434981	0.972923	0.338516	0.482203	0.333341	0.92036	0.222934	0.834172	0.833847	0.987024	0.944565	-0.170663	0.557279	0.329005	3.44072	0.258067	2.21324	0.508574	0.33652	6.88143	1.86256	0.32786	5.66089	159.11	0.0461187	35.8777	1549.6	0.353102
1660582	0	22.9	102	7144035	1.54746	36	12.1744	125	62.74	30.134	74	-221	346	15.3224	78.8175	-2.69912	7144035	0.493006	2275.9	47.1605	60.755	-8.26733	2.33742	0.477742	0.649383	0.358065	1.06756	0.340306	0.838459	0.832794	0.992889	0.961482	-0.275973	0.718414	0.275538	6.83327	0.358382	2.43651	0.705044	0.580961	13.6665	2.06692	0.703791	5.62243	47.5791	0.0413732	53.1523	566.957	0.93639
1673703	0	57	123	336902384	1.27518	35	3.39948	153	96.206	21.3032	104	-14	167	14.8828	99.7785	-0.981912	336902384	0.455773	700.156	12.7511	5.30662	-1.45851	1.32939	0.175348	0.766455	0.17381	0.66648	0.144222	0.913349	0.913249	0.993268	0.971068	-0.426107	0.802513	0.172488	3.53023	0.355155	1.93958	0.769199	0.52565	7.06045	1.75955	0.376184	4.94923	4285.82	0.12665	40.1249	15423.4	0.395222
1684732	0	47	114	363326193	1.39675	35	5.26507	160	83.0355	21.6397	87	-114	274	14.8078	87.6431	-1.08565	363326193	0.440376	786.414	27.5738	6.14556	-0.647931	1.31612	0.2459	0.683968	0.238265	0.80364	0.187302	0.882047	0.881628	0.995104	0.97032	-0.332262	0.760067	0.232441	5.22552	0.297748	2.23438	0.705879	0.469242	10.451	1.9767	0.390505	5.54122	3347.87	0.0707795	41.427	20829.8	0.428345
1687340	0	57	227.1	6401273	2.12252	56	6.48928	437	116.482	54.4537	91	0	437	28.6938	139.276	1.88315	6401273	0.346079	5829.78	11.2886	382.337	39.4786	9.28465	2.3618	0.601279	0.99844	1.89563	1.28752	0.660381	0.62512	0.974159	0.911097	-0.23075	0.791844	0.36075	3.09036	0.132538	4.0922	0.638863	0.317724	6.18071	3.11096	2.91161	5.36542	23.7273	0.0719008	20.6704	114.206	2.43773
1690431	0	7	68	14951585	1.4914	23.25	65.2992	109	38.2167	25.9122	50	-712	821	10.7355	68.5694	-6.80799	14951585	0.428178	3241.24	269.696	560.573	-33.2164	3.30368	0.754195	0.620345	0.405357	1.10317	0.583475	0.822853	0.819352	0.997882	0.979395	-0.207638	0.639391	0.319561	16.403	0.258128	2.44769	0.753596	0.391075	32.8059	2.02857	1.01447	5.68389	141.86	0.0446102	40.6893	1361.61	1.45834
1694732	0	5	52	1915965074	0.785931	26	5.37743	295	28.4127	14.7459	28	-408	703	10.8308	33.7922	0.0398982	1915965074	0.712296	334.627	101.784	1.42016	0.242874	0.450807	0.173631	0.443291	0.172803	0.657936	0.142341	0.913723	0.91368	0.999232	0.989203	-0.186481	0.476018	0.172191	10.0854	0.580357	1.39366	0.739692	0.752859	20.1708	1.2181	0.15611	4.13073	245840	0.14652	39.243	1.19513e+06	0.162069
1695316	0	37.9	86	2305878	0.840023	24	2.88166	102	63.3472	14.7671	65	3	99	10.5608	65.9599	-0.41005	2305878	0.642727	337.849	3.46034	0.889334	-0.394569	0.4616	0.183455	0.424077	0.183455	0.68122	0.148494	0.908272	0.908272	0.981654	0.954136	-0.173019	0.458078	0.183455	1.84133	0.543852	1.39516	0.44221	0.721524	3.68266	1.21171	0.161264	4.87297	29.7019	0.0560413	44.8521	340.645	0.186006
1700900	0	-4	37	329738	0.66375	20	7.63795	51	16.632	13.9458	20	-80	131	8.78883	25.6803	-1.68795	329738	0.765864	382.853	8.45585	1.32085	-0.505382	0.320102	0.172928	0.27352	0.143398	0.606809	0.150672	0.933222	0.931254	0.990349	0.972305	-0.149364	0.327166	0.11756	2.90153	0.712348	0.99497	0.376081	0.839861	5.80306	0.840784	0.123257	4.24147	46.748	0.093496	52.3239	382.932	0.165836
1702466	0	5	68	407948650	1.21237	38	14.0635	136	34.9634	21.3101	34	-322	458	15.6649	44.6191	-1.36446	407948650	0.508217	768.43	68.5411	11.1654	-0.723397	1.08499	0.219677	0.661676	0.21074	0.753353	0.173752	0.895959	0.895518	0.997832	0.980907	-0.321128	0.719146	0.204394	8.26588	0.369645	1.97027	0.746126	0.551331	16.5318	1.74854	0.326167	5.02574	21181.5	0.10337	43.0394	104139	0.359515
1703094	0	46	77	849618632	0.646985	15	16.3643	116	61.2899	10.8882	63	-103	219	6.4655	63.5386	-2.61979	849618632	0.762668	280.7	23.8264	2.52253	-0.797383	0.40488	0.125578	0.521257	0.121799	0.538451	0.110178	0.939719	0.939478	0.996622	0.982667	-0.223384	0.463521	0.118601	4.87406	0.690987	1.02447	0.589365	0.825724	9.74813	0.894363	0.132614	3.48528	51622.8	0.245297	38.2287	160504	0.16162
1709091	0	45	98	469522336	1.02069	24	23.9429	162	73.5289	17.5388	78	-570	732	10.3485	77.926	-2.54108	469522336	0.652793	665.958	195.301	9.9822	-1.226	0.760483	0.193858	0.589342	0.182305	0.697217	0.159689	0.910318	0.909884	0.999249	0.989311	-0.27054	0.620523	0.175678	13.97	0.549793	1.61806	0.724329	0.733941	27.9399	1.41692	0.238585	4.48096	10379.7	0.134244	45.9292	50473.9	0.290285
1712137	0	24	60	42627577	1.12869	17	14.0172	104	42.092	12.4363	45	-157	261	7.31572	46.0461	-2.2414	42627577	0.510353	348.514	28.487	2.41879	-0.0644964	0.787153	0.295925	0.4514	0.292162	0.872914	0.207422	0.854527	0.854295	0.994091	0.963531	-0.165175	0.523152	0.289051	5.3258	0.323557	1.96638	0.56742	0.488861	10.6516	1.66497	0.27077	5.41839	992.357	0.0493587	35.3558	10260.7	0.29603
1712422	0	35	80	198069332	0.931876	21	10.8499	120	58.7378	16.2467	64	-107	227	9.01859	63.6565	-2.35168	198069332	0.650512	602.02	23.0532	6.92431	-1.82748	0.806172	0.164493	0.656066	0.156461	0.636661	0.139071	0.923094	0.922573	0.995588	0.977791	-0.302071	0.618495	0.149565	4.78462	0.575337	1.41389	0.681964	0.74745	9.56925	1.2405	0.242666	3.97882	10366.7	0.212084	45.5946	31797	0.302103
1714308	0	6.9	79	818614	1.24471	39	2.57249	93	46.8286	22.2461	52	-32	125	16.2031	54.0705	-0.557897	818614	0.456964	730.706	6.70059	1.97098	-0.568554	0.840444	0.410287	0.337987	0.373661	1.00711	0.260183	0.819274	0.816832	0.960662	0.908416	-0.122324	0.421613	0.341613	2.56746	0.288352	2.12553	0.389487	0.441971	5.13492	1.69508	0.312683	5.22146	14.2643	0.0509439	33.6498	127.95	0.363967
1716090	0	-12.1	92	19415070	1.77928	37	20.6166	132	41.2816	41.2033	59	-672	804	16.7353	82.9746	-3.57573	19415070	0.421298	5180.61	240.83	503.09	-39.9714	5.32711	0.888692	0.702988	0.448755	1.2536	0.677825	0.821138	0.81137	0.997099	0.976201	-0.290727	0.771087	0.269595	15.4828	0.295384	2.78353	0.794098	0.509629	30.9656	2.32919	1.55395	5.85382	119	0.0421986	57.8925	1188.06	2.15984
1723167	0	22	63	14522733	1.12832	21	10.9374	102	44.6447	13.6412	48	-129	231	9.11436	48.3008	-1.7252	14522733	0.483736	339.824	20.1561	1.85469	-0.189204	0.892308	0.220383	0.603023	0.215743	0.759119	0.172591	0.892847	0.892592	0.994067	0.96926	-0.280732	0.667546	0.212201	4.4708	0.328058	1.86327	0.611616	0.400105	8.94159	1.63997	0.278173	5.36794	386.865	0.0621469	42.4744	3011.26	0.299577
1727861	0	-13	69	5691892	1.52527	43	3.18334	94	34.9041	25.918	44	-78	172	18.4976	47.3848	-0.888724	5691892	0.378114	1027.02	11.4832	6.96678	-1.3644	1.5632	0.332183	0.646861	0.319954	0.928628	0.22667	0.842061	0.841246	0.980676	0.936417	-0.266222	0.717073	0.309253	3.34287	0.231692	2.47135	0.65948	0.351006	6.68575	2.11806	0.473846	5.81165	111.404	0.0439463	41.814	958.52	0.54139
1743272	0	16	88	185044910	1.77571	30	35.8439	857	61.5674	33.326	54	-288	1145	13.1763	96.6244	4.73282	185044910	0.400267	5545.73	63.9504	2548.03	120.912	8.73037	0.750217	0.842114	0.385689	1.13962	0.595882	0.84247	0.836248	0.998733	0.98508	-0.33776	0.821466	0.256183	7.87114	0.266829	2.86436	0.870673	0.43852	15.7423	2.41565	2.37015	5.86513	1021.14	0.0515206	51.6258	7933.29	2.30908
1746400	0	23	65	47840435	1.10169	20	5.70783	98	45.5207	13.2608	48	-95	193	8.72144	48.8169	-0.980413	47840435	0.488334	310.947	12.0768	1.32246	-0.103745	0.754482	0.329297	0.391335	0.328168	0.896799	0.215677	0.836104	0.836029	0.980649	0.934404	-0.133604	0.457666	0.327179	3.45983	0.280033	2.00204	0.499353	0.355903	6.91966	1.66986	0.270945	5.49638	1002.6	0.0499429	31.6878	9803.3	0.281356
1749088	0	29	80	44213405	0.970344	24	6.52108	220	59.9157	16.3293	65	-47	267	10.5956	63.8355	-0.440391	44213405	0.603639	485.081	7.99609	2.90869	-0.452276	0.693809	0.149655	0.641735	0.141965	0.599349	0.128781	0.930252	0.929787	0.99599	0.979854	-0.343824	0.664039	0.135685	2.80354	0.542459	1.44689	0.675768	0.718341	5.60708	1.29247	0.210866	4.20757	1907.12	0.175772	42.5271	6549.49	0.244697
1750445	0	64	102	336508214	0.814564	18	7.24299	149	83.593	12.1604	85	-77	226	7.81559	85.2618	-1.19971	336508214	0.69984	281.784	16.9103	1.25892	0.138982	0.446693	0.180124	0.423164	0.179239	0.672021	0.146308	0.910522	0.910469	0.99308	0.970147	-0.197452	0.489116	0.17852	4.1041	0.5724	1.37997	0.643408	0.745039	8.20821	1.19796	0.156704	4.40207	5544.65	0.119781	42.3467	32395.6	0.170464
1752076	0	40	79	24164442	0.822593	19	3.73028	119	60.2439	12.1409	62	-19	138	8.44681	62.2295	-0.396678	24164442	0.641497	243.178	7.82221	0.826529	-0.410696	0.495511	0.212923	0.398296	0.212923	0.736453	0.165516	0.893538	0.893538	0.987475	0.957415	-0.148478	0.430665	0.212923	2.78416	0.487186	1.47172	0.416874	0.671173	5.56832	1.2588	0.177109	4.8999	397.589	0.0637162	43.5948	4002.94	0.18423
1755043	0	16	57	16627362	1.01723	20	6.39208	87	37.7069	13.2824	40	-89	176	8.48687	41.836	-1.2205	16627362	0.581224	328.435	10.4763	1.44973	0.0944013	0.601436	0.312963	0.313812	0.311242	0.883459	0.211268	0.844666	0.844551	0.981621	0.937809	-0.116913	0.410721	0.309735	3.22555	0.38098	1.84005	0.507113	0.569173	6.45109	1.52197	0.2286	5.18586	457.627	0.0481712	35.8916	5521.63	0.241542
1756927	0	40	74	32079659	0.80148	17	3.76074	103	57.6097	10.4504	58	-3	106	7.11616	59.1951	-0.495984	32079659	0.634734	185.179	7.83166	0.933688	-0.531273	0.547367	0.141658	0.587789	0.141561	0.583687	0.120855	0.929236	0.929229	0.991669	0.971691	-0.294928	0.59401	0.141476	2.78032	0.535716	1.30451	0.588956	0.708959	5.56064	1.16248	0.172256	4.36589	1314.06	0.143534	39.6111	5810.99	0.183367
1758669	0	5	68	5626165	1.40377	29	6.64291	100	39.5282	21.0729	46	-96	196	12.8706	49.192	-1.64603	5626165	0.426257	857.38	11.7667	9.69783	-1.84484	1.40707	0.336681	0.609968	0.319962	0.933202	0.229609	0.842805	0.841691	0.987184	0.947071	-0.242878	0.67167	0.305333	3.39094	0.255528	2.33935	0.666083	0.348212	6.78189	2.00079	0.435939	5.75828	102.702	0.0441731	40.1501	991.048	0.487214
1762068	0	24	64	172084131	1.22144	17	16.909	113	45.408	13.4968	49	-233	346	7.68523	49.8405	-2.58845	172084131	0.464604	422.184	42.1651	4.45465	-0.746667	0.980207	0.293195	0.537643	0.287496	0.869552	0.207287	0.85713	0.856819	0.995499	0.968118	-0.214356	0.609923	0.283171	6.48022	0.284861	2.08614	0.654717	0.37745	12.9604	1.78623	0.318351	5.53404	3771.8	0.0544467	37.8832	32185.4	0.350191
1768616	0	35	72	55406352	0.825874	15	8.86268	94	56.4452	12.0256	60	-73	167	6.82455	59.0683	-2.01361	55406352	0.661035	303.003	14.6003	2.44939	-0.936795	0.597171	0.122313	0.657347	0.121702	0.533968	0.10719	0.939251	0.93921	0.992816	0.97568	-0.344677	0.630454	0.121167	3.80545	0.598379	1.23792	0.673134	0.761042	7.6109	1.11392	0.179871	4.06352	2975.11	0.187349	40.0144	10497.2	0.208122
1769602	0	9	59	5060581	1.29127	22	21.6791	86	35.3004	18.6325	42	-219	305	9.81498	47.1121	-3.63171	5060581	0.496239	973.432	39.2831	21.6861	-2.83189	1.26902	0.394878	0.517968	0.349213	1.00043	0.269335	0.831863	0.829907	0.992261	0.956943	-0.169148	0.559857	0.319667	6.25014	0.301645	2.21008	0.652846	0.476404	12.5003	1.84155	0.415973	5.52389	107.266	0.0470464	35.7781	1131.42	0.51295
1771424	0	37	87	2754074	0.781905	19	5.65923	106	65.8386	15.7569	71	-17	123	8.761	69.5105	-1.56786	2754074	0.727085	496.988	8.45668	2.37671	-0.803321	0.437333	0.155594	0.446297	0.140738	0.593895	0.134438	0.932107	0.931116	0.99111	0.972348	-0.221553	0.464754	0.12774	2.89583	0.694966	1.10576	0.507931	0.829803	5.79165	0.93542	0.148232	4.35061	49.4561	0.0867652	56.4736	414.439	0.205445
1774337	0	5	72	41200084	1.48933	29	15.4929	120	40.7495	24.8239	50	-271	391	12.9095	57.0132	-3.00373	41200084	0.426141	1589.98	55.5966	51.8652	-7.05429	2.0833	0.373345	0.684129	0.325039	0.981769	0.263734	0.844925	0.842299	0.9955	0.967924	-0.288087	0.729937	0.288414	7.42754	0.271616	2.37392	0.753721	0.415694	14.8551	2.04724	0.614162	5.69781	587.772	0.0463725	45.6729	5401.33	0.768763
1774378	0	35	74	145241459	1.05055	19	44.978	124	53.9888	14.0457	57	-321	445	8.1933	59.1983	-4.78976	145241459	0.560506	589.65	75.6249	19.3642	-2.69024	0.953767	0.267064	0.55657	0.252326	0.833542	0.201248	0.876001	0.875301	0.997368	0.977169	-0.20611	0.564055	0.242122	8.68638	0.402323	1.78292	0.740497	0.590694	17.3728	1.52659	0.305208	5.11646	2561.78	0.0618117	43.6505	23230.2	0.36379
1778229	0	-2	73	8811830	1.55779	35	6.47947	178	40.3547	24.7851	48	-123	301	15.391	53.0169	-1.33351	8811830	0.398324	1182.29	20.0721	13.9353	-2.08371	1.67719	0.320654	0.674742	0.297679	0.920457	0.228715	0.854937	0.853458	0.993641	0.963107	-0.296659	0.74603	0.27807	4.44208	0.261581	2.46677	0.710792	0.399431	8.88415	2.13104	0.499461	5.71625	148.765	0.0474528	46.0223	1248.75	0.591509
1779033	0	74	114	63220977	1.0391	21	4.83809	153	92.8475	13.0668	92	-5	158	8.81153	94.4295	-0.384813	63220977	0.532677	296.258	11.2887	1.16132	0.338213	0.772746	0.200745	0.587081	0.197861	0.719207	0.160156	0.90155	0.901358	0.992302	0.967092	-0.276186	0.642667	0.195337	3.33851	0.381899	1.73466	0.597353	0.547181	6.67702	1.52493	0.243373	5.09848	583.57	0.0823089	43.5411	3776.68	0.252028
1787188	0	7	70	166434809	1.36628	23	7.73479	131	44.8323	19.9037	52	-128	259	10.9227	53.3048	-1.95486	166434809	0.447475	831.463	20.6334	11.2075	-2.43269	1.39501	0.315126	0.62894	0.308463	0.899336	0.216455	0.846837	0.846434	0.991513	0.956051	-0.254605	0.680533	0.303029	4.51257	0.287273	2.24566	0.74685	0.456447	9.02513	1.91845	0.427535	5.59629	2859.37	0.0488156	38.1118	26210.8	0.488214
1789598	0	60	93	84896530	0.47747	17	20.2235	124	76.5589	10.6222	78	-119	243	6.92196	78.0114	-2.06396	84896530	0.858013	224.515	24.9958	1.92787	-0.288614	0.239498	0.088398	0.459262	0.0827536	0.415668	0.0812405	0.959511	0.959187	0.997638	0.988276	-0.217081	0.402634	0.0783102	4.9958	0.801744	0.78242	0.562287	0.89431	9.9916	0.693202	0.0819739	3.39273	3579.76	0.256614	37.3678	11969.3	0.089411
1795577	0	34	110	346337703	1.52242	36	5.53356	153	76.9958	24.6924	85	-89	242	15.9144	83.7395	-1.40755	346337703	0.425093	1083.95	17.063	12.4036	-1.80479	1.60569	0.319755	0.665748	0.307888	0.911458	0.221306	0.847994	0.847243	0.991409	0.956226	-0.283474	0.736159	0.297881	4.09161	0.267124	2.49145	0.721105	0.46081	8.18322	2.15229	0.481362	5.83768	2400.85	0.0486099	39.7946	20995.3	0.541643
1802874	0	8.9	197.1	16388367	2.18897	59.75	6.49779	423	73.5558	60.3427	43	-55	478	31.1374	112.713	1.97164	16388367	0.330846	7293.7	20.074	740.499	68.905	11.9586	1.54308	0.773218	0.73993	1.64947	0.962434	0.7271	0.704801	0.988113	0.943019	-0.275856	0.833775	0.345962	4.17925	0.159337	3.98635	0.787414	0.357124	8.3585	3.10653	3.37541	6.06392	61.893	0.0479791	36.3843	426.791	2.9896
1803377	0	19	62	11392502	1.0824	19	6.06141	103	42.1243	13.1642	44	-96	199	8.04754	45.9105	-0.964035	11392502	0.524115	333.312	11.0693	1.39405	0.209595	0.742295	0.261277	0.477763	0.259216	0.823264	0.191634	0.870731	0.870598	0.989968	0.956846	-0.185322	0.54449	0.257453	3.30893	0.351575	1.8747	0.502407	0.527034	6.61785	1.60973	0.250893	5.35381	276.123	0.0510867	37.771	2832.84	0.267607
1805663	0	4	69	1766325	1.29389	33	3.38041	87	40.4701	19.7995	45	-66	153	14.1181	47.4352	-0.705338	1766325	0.4432	612.269	11.9117	2.74494	-0.478191	1.01864	0.34501	0.492138	0.3331	0.929798	0.227956	0.835435	0.834641	0.979915	0.933777	-0.18181	0.571075	0.322678	3.42677	0.257413	2.2353	0.511389	0.343034	6.85353	1.87394	0.340913	5.56976	36.7478	0.0468124	36.1514	347.912	0.368719
1809230	0	6	59	113358080	1.18917	26	112.389	121	28.5587	21.9393	34	-894	1015	11.1573	60.2815	-8.97611	113358080	0.575536	2818.26	364.659	2056.9	-80.1221	4.3734	0.543741	0.779505	0.294392	0.940251	0.45391	0.872318	0.869738	0.998831	0.987035	-0.239049	0.640262	0.229317	19.0709	0.416428	2.04781	0.836596	0.619024	38.1419	1.73492	1.22929	5.20351	2107.94	0.0675731	49.3558	17953.9	1.18577
1816102	0	41	96	232359551	1.13255	26	108.966	186	68.1425	22.1995	76	-899	1085	11.2695	82.4145	-8.13129	232359551	0.635446	2148.75	396.34	467.196	-21.9788	1.96539	0.424776	0.631705	0.228015	0.815468	0.371721	0.901251	0.899005	0.999172	0.990385	-0.255144	0.628426	0.175584	19.8986	0.533613	1.78504	0.7074	0.723116	39.7972	1.53263	0.597542	4.77978	3474.88	0.101575	51.0358	21738.6	0.876076
1817495	0	26	71	493843777	1.08937	22	7.39527	117	50.1854	14.2086	53	-119	236	9.47873	53.7038	-1.2244	493843777	0.499751	365.52	21.0199	2.08068	-0.484023	0.836815	0.249421	0.539962	0.247742	0.800774	0.185141	0.876404	0.876297	0.993266	0.964638	-0.228551	0.601159	0.246314	4.5687	0.325201	1.88213	0.638103	0.459024	9.1374	1.62833	0.271559	5.22951	12275.6	0.0716909	39.7917	85572.3	0.283963
1817672	0	-1	128.2	2658856	2.11949	80	2.60205	199	59.8554	44.0444	58	-78	277	32.3036	80.043	0.0817334	2658856	0.26092	2824.21	15.9671	30.7588	0.402316	3.57918	0.692909	0.67292	0.560124	1.22974	0.35774	0.741662	0.733216	0.981842	0.922334	-0.255642	0.784131	0.447774	3.90412	0.108474	3.60207	0.703412	0.187916	7.80824	2.87703	1.06802	5.87708	26.7398	0.0644332	20.9036	108.282	1.1527
1818188	1	26	59	705330806	1.02653	16	27.3654	113	43.0039	10.727	45	-242	355	6.94604	45.7918	-2.79923	705330806	0.537009	247.554	40.1428	2.36905	0.0167227	0.700232	0.293411	0.408568	0.290789	0.861241	0.204575	0.855013	0.854867	0.99549	0.967719	-0.148571	0.47313	0.288762	6.32781	0.341232	1.85219	0.64189	0.508277	12.6556	1.55747	0.248411	5.22671	19947.9	0.0593035	37.7356	180634	0.261002
1827954	0	7	54	1658404	0.900471	24	3.96618	83	30.7462	14.8861	31	-55	138	10.2213	36.2076	-0.404047	1658404	0.659692	365.66	9.88668	1.42686	0.242349	0.545855	0.197963	0.46724	0.196844	0.712611	0.15788	0.901765	0.90169	0.988375	0.960669	-0.194546	0.51865	0.195864	3.13043	0.512998	1.55831	0.497842	0.700671	6.26086	1.35668	0.185954	5.12235	66.6332	0.0526745	45.5721	834.51	0.195925
1829302	0	30.4	82	2414970	0.827475	25	3.5619	98	61.6557	15.8544	67	-5	103	10.908	64.807	-1.0207	2414970	0.644346	398.528	8.0368	1.15722	-0.578071	0.470768	0.150465	0.509901	0.14935	0.600804	0.126278	0.925511	0.925437	0.985005	0.962718	-0.242676	0.509764	0.148374	2.82071	0.589955	1.21851	0.533191	0.753907	5.64142	1.06672	0.155308	4.39472	53.0591	0.0922767	49.1619	370.499	0.197971
1843046	0	31	101	1870092280	1.34599	47	2.08148	166	67.8072	23.2643	72	-231	397	18.8431	72.913	-0.15266	1870092280	0.440649	718.494	46.4093	4.55037	0.0909463	1.39246	0.151938	0.803207	0.150951	0.609473	0.128238	0.924676	0.924622	0.998148	0.984914	-0.512035	0.861597	0.150196	6.78964	0.338492	1.99673	0.84913	0.496383	13.5793	1.84149	0.3861	4.70125	66600.9	0.189334	34.2266	155005	0.387098
1844878	0	71	137	294086805	1.0783	31	6.2469	160	109.883	21.1606	118	-55	215	13.741	113.435	-1.57895	294086805	0.58305	793.124	22.7522	5.61086	-1.62684	0.921445	0.154674	0.709212	0.145665	0.612199	0.132977	0.928624	0.928068	0.99586	0.979349	-0.37788	0.713075	0.138204	4.74976	0.530398	1.55356	0.724161	0.711586	9.49953	1.38699	0.26903	4.18029	4714.17	0.206264	47.4929	13325.6	0.33515
1846816	0	8	66	3243627	1.24965	27.75	3.69804	87	40.8557	17.5315	45	-39	126	11.936	46.6576	-0.873883	3243627	0.455915	507.742	5.92043	2.54924	-0.384446	0.963709	0.336268	0.481003	0.334033	0.911819	0.220065	0.833356	0.833207	0.966476	0.916604	-0.177297	0.566711	0.332076	2.40066	0.257184	2.19831	0.553258	0.348187	4.80133	1.85666	0.324994	5.58146	71.9221	0.0482699	33.6336	679.314	0.343034
1846877	0	72	128	164811499	1.16346	26	6.09326	165	104.062	18.0824	109	-39	204	11.1642	106.964	-1.28761	164811499	0.531572	612.343	14.0125	4.82496	-1.25829	0.96764	0.173802	0.692704	0.165807	0.660178	0.145564	0.918374	0.917896	0.993386	0.972552	-0.365163	0.728232	0.15933	3.7167	0.456504	1.73377	0.707853	0.645424	7.43339	1.54997	0.28536	4.62535	1990.61	0.138189	44.1861	7657.29	0.335227
1848327	0	45	74	8384721	0.68535	14	4.07881	92	59.2946	9.05146	60	-3	95	6.26814	60.444	-0.477828	8384721	0.704142	137.629	8.09922	0.573832	-0.346787	0.350961	0.190979	0.292263	0.190501	0.697435	0.153345	0.904829	0.904797	0.980924	0.952399	-0.0967519	0.305307	0.190083	2.83887	0.577263	1.21393	0.293686	0.743976	5.67774	1.0217	0.135485	4.61334	160.472	0.0699224	48.3345	1616	0.149001
1849171	0	19	69	30933483	1.31447	22	21.924	89	44.8432	18.2893	51	-266	355	9.57432	54.213	-3.54229	30933483	0.458688	928.133	56.4768	24.5702	-3.66143	1.43299	0.336489	0.614145	0.31212	0.937427	0.235806	0.847723	0.846369	0.994865	0.965584	-0.234174	0.650581	0.293373	7.49683	0.287669	2.19126	0.716169	0.431057	14.9937	1.86908	0.44237	5.60679	482.958	0.0458868	40.9509	4827.69	0.527843
1865509	0	71	106	310899250	0.843317	19	8.76823	137	88.0309	11.268	89	-124	261	7.75896	89.2734	-0.947522	310899250	0.648435	220.299	27.1101	1.19954	0.401837	0.53825	0.176131	0.506028	0.174702	0.665767	0.144322	0.91288	0.912792	0.995246	0.975068	-0.225058	0.536984	0.173523	5.19803	0.516381	1.43479	0.535661	0.697159	10.3961	1.25542	0.178595	4.44654	5367.94	0.137604	41.1177	25295.5	0.187513
1870283	0	37	72	77162975	0.941609	16	8.16679	121	54.9117	11.5864	57	-63	184	6.9894	57.3876	-1.44318	77162975	0.591336	278.047	13.9779	1.78315	-0.711793	0.682211	0.199873	0.545743	0.199379	0.715404	0.158653	0.900393	0.90036	0.992317	0.966782	-0.237747	0.578904	0.198947	3.72254	0.448587	1.597	0.596271	0.635046	7.44507	1.39538	0.220521	4.92359	1895.69	0.0809087	40.7848	13855	0.234963
1875356	0	11	64	9496644	1.17762	25	3.11981	81	42.6028	15.7231	47	-21	102	10.9619	46.9404	-0.852274	9496644	0.470315	388.4	6.23943	1.66899	-0.224113	0.889869	0.273348	0.528438	0.272354	0.839061	0.196652	0.863989	0.863923	0.972711	0.931961	-0.208835	0.596739	0.271483	2.46677	0.292615	2.015	0.530877	0.373624	4.93355	1.73823	0.290804	5.45543	211.897	0.0491639	35.8212	2027.06	0.310827
1909488	0	30	90	126537871	1.26032	30	34.2612	203	60.3093	21.7216	66	-419	622	12.5808	70.0055	-3.91245	126537871	0.549749	1263.55	116.337	44.7737	-4.54542	1.30268	0.343365	0.574895	0.268261	0.898761	0.269719	0.874592	0.872529	0.998293	0.9824	-0.220273	0.616895	0.232497	10.7748	0.420847	2.04689	0.646947	0.626666	21.5496	1.73132	0.411511	5.1226	1987.94	0.0769923	54.2746	14194.5	0.557695
1915668	0	56	112	138620616	1.32039	24	7.90754	143	87.149	18.0524	92	-62	205	10.6864	90.9175	-1.83733	138620616	0.465238	671.047	18.5834	5.41628	-0.662073	1.116	0.285402	0.589563	0.278105	0.864233	0.205229	0.862154	0.861677	0.989082	0.953822	-0.245902	0.660331	0.271806	4.28666	0.29968	2.17278	0.626807	0.463292	8.57332	1.87854	0.35035	5.6113	843.932	0.0503239	42.0865	7802.04	0.400815
1920639	0	36	88	546096297	1.00478	26	5.89056	133	62.7222	16.4918	65	-221	354	11.2702	66.2865	-0.811771	546096297	0.599119	459.827	46.4199	2.46442	-0.601688	0.674544	0.217409	0.510671	0.214568	0.748879	0.16944	0.893147	0.892996	0.996661	0.97619	-0.209337	0.554869	0.212459	6.80482	0.461587	1.71029	0.551851	0.656094	13.6096	1.48748	0.222988	4.87581	9962.71	0.0801602	43.8828	74461.5	0.243513
1921419	0	24	69	139996746	1.32441	18	49.644	167	45.7436	20.3675	54	-728	895	8.14849	61.9783	-5.70104	139996746	0.498729	1748.84	275.386	152.624	-12.9379	2.10036	0.389322	0.67691	0.286103	0.935572	0.305569	0.868279	0.865794	0.998943	0.985919	-0.258758	0.672308	0.241045	16.5819	0.360278	2.1143	0.745881	0.552053	33.1637	1.79608	0.622421	5.34448	2344.99	0.0643432	49.578	18176.2	0.86728
1935931	0	61	129	212176483	1.275	41	22.1089	163	98.4758	23.2303	105	-426	589	16.9933	102.922	-2.18002	212176483	0.461514	895.444	133.857	13.6651	-1.84552	1.22368	0.181133	0.739741	0.160275	0.646777	0.154697	0.922072	0.921566	0.998952	0.988638	-0.434795	0.795843	0.151355	11.5584	0.383023	1.83842	0.801265	0.539042	23.1167	1.66293	0.351204	4.59146	3258.12	0.162662	41.9184	9244.13	0.420764
1945131	0	-8	52	139843962	1.28525	20	28.4461	91	23.0922	25.6678	35	-418	509	9.50286	54.8722	-4.51699	139843962	0.59101	2477.71	99.4742	242.785	-21.0048	2.81224	0.337391	0.773186	0.250036	0.872441	0.272254	0.886782	0.883587	0.997295	0.979692	-0.332893	0.727442	0.198746	9.94258	0.48214	1.95557	0.858544	0.682824	19.8852	1.69272	0.787407	4.87356	4997.38	0.107598	52.6244	27449.5	1.01694
1946100	0	15	91	523892943	1.35681	37	59.8275	149	55.9336	25.6762	64	-766	915	16.1207	70.058	-5.39875	523892943	0.497147	1779.55	312.493	195.759	-12.5285	1.96555	0.338784	0.702162	0.248099	0.848717	0.27544	0.884536	0.88305	0.999087	0.987785	-0.317023	0.739799	0.216818	17.666	0.368907	2.1735	0.752562	0.568645	35.3319	1.89615	0.576084	5.23476	8826.24	0.0826891	45.785	53065.5	0.747388
1952070	0	22	86	406260147	1.17194	32	6.46913	127	56.7267	20.2965	61	-127	254	13.4722	62.8446	-1.3156	406260147	0.52964	731.535	22.1752	5.51201	-1.27293	1.02742	0.186288	0.691338	0.179597	0.688673	0.152851	0.911291	0.91087	0.994994	0.974461	-0.356091	0.733728	0.173987	4.68667	0.41421	1.83954	0.711439	0.599902	9.37333	1.64202	0.303426	4.79865	13929.2	0.135413	42.3023	54481.4	0.340069
1969465	0	29	83	4727988	1.35128	26	13.6317	275	59.1158	19.9602	55	0	275	11.0604	67.2636	2.61846	4727988	0.455749	1029.71	3.44988	27.0313	4.02975	1.75941	0.418789	0.616282	0.336693	1.02951	0.300869	0.843965	0.839822	0.989123	0.9533	-0.248981	0.685852	0.277527	1.76481	0.284518	2.37058	0.668406	0.447757	3.52963	2.00059	0.544549	5.5914	52.1675	0.049921	39.3818	476.257	0.525003
1981102	0	14	97	860164395	1.37409	55	2.51067	154	58.5609	27.2369	64	-268	422	21.5895	66.6593	-0.265471	860164395	0.434043	1014.08	59.4148	4.74806	0.0384577	1.3792	0.18695	0.761054	0.181971	0.689114	0.152663	0.909741	0.909498	0.998154	0.983493	-0.449507	0.835978	0.178489	7.68874	0.320664	2.10535	0.81483	0.452598	15.3775	1.90886	0.391537	4.98778	25565.4	0.132066	40.623	84022	0.400172
1985051	0	2	72	8230239	1.57694	35	19.626	154	36.3365	25.7092	41	-313	467	14.9903	54.957	-2.85445	8230239	0.423249	1699.93	68.7779	58.9672	-5.24587	2.04699	0.479397	0.61311	0.35652	1.05539	0.348477	0.83693	0.833226	0.996183	0.97101	-0.253129	0.718059	0.293364	8.26957	0.257731	2.63584	0.686157	0.43205	16.5391	2.21302	0.631597	5.89402	120.753	0.0443129	42.5887	1153.35	0.785584
1991688	0	2.4	80	6261386	1.39835	36	5.19903	113	47.0486	24.2943	54	-98	211	15.4221	57.1809	-1.36165	6261386	0.440782	1056.09	12.891	8.55886	-2.04079	1.3099	0.373391	0.549247	0.334214	0.98713	0.256998	0.83928	0.836811	0.98597	0.94522	-0.195768	0.599189	0.301275	3.55755	0.304851	2.28382	0.577302	0.493903	7.11511	1.8952	0.420823	5.42873	86.1352	0.0449792	49.0646	844.098	0.501347
1995089	0	37	85	312979246	1.02409	23	7.00996	139	61.0247	15.7541	63	-127	266	9.70508	64.9006	-1.15142	312979246	0.608675	488.078	23.2391	3.25191	-0.818371	0.721191	0.214558	0.539074	0.211297	0.746846	0.168438	0.894879	0.894678	0.994216	0.969872	-0.222619	0.576213	0.208596	4.80754	0.476814	1.71257	0.60458	0.671229	9.61507	1.4899	0.233937	4.79721	6504.18	0.0875335	43.6202	45227.6	0.263402
2002210	0	49	81	384729653	0.527828	16	14.3828	110	65.0464	10.4306	67	-114	224	6.91924	66.6375	-1.92541	384729653	0.803796	209.522	24.0647	1.2802	-0.504062	0.301707	0.0852821	0.55653	0.0840109	0.416636	0.0779956	0.958198	0.958122	0.997701	0.988021	-0.284187	0.482368	0.0829781	4.90006	0.748925	0.825326	0.596275	0.861705	9.80012	0.738364	0.0967473	3.17612	27973.7	0.322872	33.3611	69640.9	0.11153
2014789	1	-40	84.2	181320	2.07293	40	4.06157	142	33.6889	39.4538	47	-116	258	21.2327	63.477	-0.906487	906600	0.289877	2894.39	18.9639	50.6859	-6.24873	3.19447	1.35401	0.401765	0.776397	1.54695	0.728677	0.688022	0.667357	0.967507	0.898372	-0.208125	0.744963	0.444817	4.30142	0.120131	3.57739	0.708286	0.215614	8.60284	2.58535	1.13712	4.03665	7.17778	0.159506	3.25136	13.0444	1.28691
2022374	0	34	61	167399121	1.03702	13	7.12744	92	47.5243	8.79952	49	-68	160	5.78253	49.0125	-1.17711	167399121	0.497095	143.669	12.1403	0.836704	0.0151787	0.707325	0.313958	0.385002	0.313821	0.878418	0.210345	0.843112	0.843103	0.981534	0.93724	-0.130931	0.444503	0.313701	3.47015	0.289018	1.916	0.445007	0.366876	6.9403	1.60142	0.255321	5.45578	3508.88	0.0503535	34.3242	34640.1	0.25845
2027288	0	69	119	39027826	1.12229	27	3.36966	144	95.8091	15.8678	98	4	140	11.1359	97.8641	-0.590509	39027826	0.480828	398.001	6.46246	1.46491	-0.258853	0.858508	0.2484	0.549861	0.247291	0.80163	0.184898	0.876539	0.876465	0.975211	0.938233	-0.231901	0.614049	0.246321	2.51189	0.31148	1.91941	0.556473	0.409875	5.02378	1.6674	0.276727	5.32119	220.673	0.0541529	36.5082	1959.37	0.288481
2029791	0	32	64	42734106	1.06831	13	15.9087	83	49.3893	11.2301	53	-93	176	5.74058	52.5754	-2.98344	42734106	0.537657	324.873	13.669	3.17528	-0.966017	0.798174	0.242415	0.53022	0.23171	0.796171	0.186365	0.885872	0.885215	0.985944	0.954008	-0.216463	0.568588	0.222881	3.67831	0.404508	1.7533	0.566393	0.591228	7.35662	1.50101	0.260147	5.01632	1141.51	0.0738364	45.9189	8312.17	0.302163
2036267	1	12	82	348070473	1.26852	38	5.45043	131	52.1742	23.3074	60	-237	368	16.0211	60.178	-1.25092	348070473	0.493127	899.245	44.1187	7.75393	-1.77307	1.28209	0.144419	0.796318	0.13932	0.589095	0.124325	0.931168	0.930849	0.997786	0.984576	-0.482684	0.825416	0.135058	6.62074	0.415779	1.82588	0.809089	0.591697	13.2415	1.6714	0.356626	4.43888	21940.2	0.22827	39.8293	47396.9	0.402503
2041478	0	-6	59	2271659	1.38373	33	3.90375	75	32.2438	20.5796	39	-73	148	14.1506	41.406	-1.0741	2271659	0.440641	674.799	10.6695	3.90488	-0.283446	1.14072	0.289789	0.591685	0.287383	0.866805	0.205108	0.856709	0.856549	0.982996	0.942604	-0.246377	0.675389	0.285278	3.23363	0.283263	2.25298	0.599899	0.4572	6.46726	1.95831	0.357627	5.66198	60.5683	0.0457119	39.4972	583.85	0.411669
2045128	0	52	86	32366619	0.519838	17	23.4437	122	68.8089	11.6831	71	-142	264	7.24593	71.1146	-3.06245	32366619	0.835708	322.619	24.4091	2.14253	-0.556145	0.258633	0.114358	0.375566	0.097988	0.472086	0.10444	0.953408	0.952624	0.997002	0.986278	-0.147314	0.321251	0.0866139	4.9369	0.793128	0.785812	0.417854	0.88885	9.8738	0.678154	0.0932479	3.77426	1056.69	0.165108	46.2851	5348.53	0.126976
2045718	1	26	84	1386987377	1.16847	30	50.4741	163	57.0077	19.1128	61	-633	796	12.7472	63.1076	-3.37883	1386987377	0.526526	732.686	215.862	58.4104	-3.84267	1.14208	0.20981	0.688738	0.191444	0.71781	0.171732	0.906388	0.90585	0.999281	0.989413	-0.335293	0.718654	0.182523	14.6843	0.402365	1.86834	0.776812	0.586915	29.3686	1.65608	0.337973	4.79016	48913.5	0.140449	41.552	183370	0.363408
2048282	0	76	194	222391751	1.94894	59	3.23485	251	140.329	35.8115	147	-69	320	24.7846	147.478	-0.602305	222391751	0.302118	2057.49	30.0209	23.6566	-2.12795	2.73959	0.452124	0.714282	0.391873	1.07464	0.292831	0.813618	0.810072	0.993141	0.957116	-0.295896	0.802754	0.343636	5.42662	0.167753	3.15046	0.726905	0.306324	10.8532	2.64466	0.79793	6.26858	439.698	0.0430023	42.4544	3089.16	0.921837
2050685	0	23	80	10060227	1.16249	26	3.77648	109	53.0582	17.1329	55	-34	143	11.1507	57.6688	-0.621044	10060227	0.502289	510.524	7.29908	2.33379	-0.700887	0.849804	0.246321	0.546586	0.245209	0.801463	0.184597	0.877581	0.877507	0.98553	0.950995	-0.22416	0.605068	0.244236	2.67352	0.373153	1.90277	0.561569	0.561287	5.34705	1.65326	0.274031	5.17066	162.442	0.0536998	45.3104	1519.42	0.312684
2058855	0	25	69	159998465	1.08769	23	6.32131	114	47.8517	14.143	49	-133	247	9.64269	51.2902	-0.828031	159998465	0.488968	340.899	20.3199	1.44097	-0.147659	0.796259	0.279412	0.479884	0.277309	0.844038	0.198752	0.861684	0.861556	0.992458	0.960421	-0.184244	0.543666	0.275578	4.4934	0.29921	1.93448	0.556951	0.365432	8.9868	1.65054	0.268918	5.43635	3333.27	0.0548055	39.0929	29739	0.277828
2060784	0	29	66	477997545	1.23403	18	46.294	541	46.7999	14.2026	51	-468	1009	7.52487	53.6853	-4.36159	477997545	0.47347	691.873	132.743	25.5642	-2.841	1.25032	0.292884	0.616054	0.270654	0.87015	0.217151	0.86768	0.866765	0.999339	0.98774	-0.252313	0.655991	0.256891	11.511	0.304708	2.05578	0.780981	0.427464	23.0221	1.77327	0.385801	5.42992	10393	0.0626653	41.4129	78525	0.45767
2062114	0	48	111	455237955	1.36697	30	40.1811	571	84.3728	19.8811	89	-570	1141	13.2069	88.9708	-0.0629664	455237955	0.460464	797.044	202.114	30.0572	0.882624	1.36934	0.334549	0.606472	0.295536	0.895118	0.242284	0.856164	0.855369	0.999424	0.988233	-0.276501	0.708024	0.280396	14.2076	0.285119	2.31837	0.711693	0.467556	28.4151	1.99931	0.425973	5.71416	3044.47	0.0529381	40.9009	26481.3	0.445596
2072020	0	12	62	208475565	1.22124	25	44.2959	118	36.3612	17.8898	40	-605	723	10.4521	47.0575	-4.42886	208475565	0.516616	892.273	202.993	43.1115	-3.62943	1.19909	0.360944	0.531747	0.329826	0.9508	0.247483	0.839112	0.837907	0.998604	0.980693	-0.177848	0.556928	0.311553	14.2402	0.324531	2.12418	0.779911	0.506041	28.4804	1.77357	0.390009	5.45575	4534.64	0.0481666	40.3492	48636.8	0.464508
2084441	0	37	82	40554622	0.853356	21	3.84402	113	60.7913	13.502	62	-36	149	8.76882	63.3665	-0.465574	40554622	0.640431	319.729	8.07699	1.13883	-0.486215	0.520673	0.15329	0.542542	0.153272	0.613077	0.129009	0.923367	0.923366	0.990983	0.969346	-0.253407	0.561718	0.153256	2.82578	0.5536	1.36955	0.555556	0.72815	5.65156	1.21619	0.168491	4.48045	1203.98	0.119206	45.1375	6468.35	0.19072
2084447	0	15	54	38985	0.708836	19	2.45413	63	32.1613	12.2414	30	0	63	9.1104	35.4624	0.174075	194925	0.687825	223.232	1.61768	0.681891	0.369634	0.48923	0.255357	0.323062	0.255357	0.798596	0.184381	0.872321	0.872321	0.948929	0.914881	-0.106257	0.34974	0.255357	1.24845	0.443326	1.52972	0.323062	0.623869	2.4969	1.27436	0.186147	3.03079	6.6129	0.213319	2.36629	21.3226	0.156087
2097331	0	26	71	136890528	1.06015	23	4.56522	201	51.0252	14.082	54	-52	253	9.5699	54.1964	-0.571383	136890528	0.508507	333.678	13.2331	1.38892	-0.395069	0.803379	0.211772	0.581955	0.210296	0.739225	0.165881	0.895092	0.895	0.995768	0.973733	-0.266165	0.636232	0.209063	3.61734	0.362888	1.77258	0.596034	0.518681	7.23468	1.55799	0.253788	5.02862	3937.6	0.0844888	38.6246	23699	0.267125
2100125	0	5	60	38326114	1.35068	20	8.13189	96	38.3085	17.3268	45	-114	210	9.49967	45.77	-1.99705	38326114	0.44742	627.354	18.7423	5.97803	-0.881913	1.13863	0.3259	0.551943	0.319901	0.911363	0.219963	0.841047	0.840649	0.987513	0.946826	-0.215361	0.632361	0.314675	4.30568	0.26804	2.26883	0.667515	0.413089	8.61136	1.93268	0.366133	5.72891	858.908	0.0469477	35.9332	8185.54	0.414501
2102443	0	23	75	25270759	1.12466	25	4.93836	104	51.5922	16.4742	55	-68	172	10.8176	56.0288	-1.08423	25270759	0.503986	477.472	13.3321	2.48324	-0.780781	0.825317	0.279707	0.491112	0.277557	0.850459	0.200122	0.861579	0.861436	0.989259	0.953792	-0.182232	0.546984	0.275677	3.63256	0.344911	1.91855	0.557101	0.522985	7.26513	1.63295	0.276256	5.31089	398.218	0.0494681	44.3094	4057.09	0.304913
2123362	0	20	70	4381587	1.08908	26	3.08213	99	47.9982	15.742	51	-26	125	11.1072	51.8468	-0.651444	4381587	0.490299	384.267	6.71687	1.22324	-0.313815	0.81619	0.23766	0.547806	0.237295	0.785808	0.179857	0.881413	0.881389	0.976251	0.940694	-0.229857	0.607874	0.236976	2.56362	0.328811	1.85139	0.549292	0.460415	5.12724	1.61247	0.263463	5.40765	82.8466	0.0508262	38.9114	799.188	0.278752
2127533	0	19	71	18610599	1.18012	25	5.35327	99	48.1576	16.5892	53	-79	178	10.8332	52.9216	-1.24803	18610599	0.479744	481.541	13.0092	2.47505	-0.71656	0.867449	0.30768	0.473256	0.301363	0.891846	0.213568	0.850371	0.84995	0.982013	0.939938	-0.165215	0.527905	0.295836	3.58733	0.313974	2.01285	0.488388	0.47753	7.17466	1.69342	0.293782	5.39601	304.661	0.0458482	43.4412	3187.9	0.331044
2128385	0	27	71	96238084	1.04832	20	4.61602	111	51.2663	13.5401	54	-72	183	8.96096	54.2957	-0.961711	96238084	0.516722	319.787	13.3766	1.24922	-0.45494	0.724494	0.255926	0.475907	0.255015	0.810425	0.187896	0.872645	0.872584	0.990164	0.957519	-0.182642	0.52658	0.254218	3.64134	0.356171	1.79968	0.481802	0.5252	7.28268	1.54076	0.245105	5.18038	1883.99	0.0577114	40.6863	16868.4	0.266278
2145226	0	23	66	58723425	1.0951	22	4.60211	103	45.6711	13.7998	48	-66	169	9.40812	49.043	-0.763663	58723425	0.488985	319.373	11.9673	1.21604	-0.0467591	0.756857	0.323354	0.400598	0.32239	0.88881	0.21343	0.838966	0.838901	0.987571	0.946291	-0.139678	0.465779	0.321547	3.44369	0.283069	1.99964	0.424501	0.373738	6.88737	1.67334	0.270053	5.54812	1158.91	0.0474672	37.3869	11938.6	0.277224
2150307	0	46	94	84057504	0.893307	24	4.37477	126	69.9409	15.1779	71	-27	153	9.91409	72.7894	-0.633038	84057504	0.679584	406.572	8.89051	1.9189	-0.188714	0.533587	0.153773	0.549963	0.152521	0.61564	0.129765	0.923948	0.923865	0.990977	0.969538	-0.262968	0.582385	0.151425	2.96571	0.588597	1.43089	0.55815	0.76068	5.93143	1.27326	0.17184	4.31046	2431.24	0.153246	44.1113	10781.6	0.195466
2152215	0	18	74	87185056	1.57827	25	30.5891	184	41.9513	26.8478	52	-613	797	10.7497	68.5751	-4.53816	87185056	0.426801	2942.62	209.931	236.232	-19.4218	3.00057	0.61103	0.648176	0.352754	1.07683	0.484012	0.849385	0.844478	0.997981	0.981067	-0.262443	0.71732	0.255683	14.4683	0.282458	2.50598	0.695055	0.434522	28.9367	2.09722	0.902899	5.63198	1135.08	0.0612234	55.0641	7912.88	1.33126
2152926	1	30	126	341810899	1.72803	47	7.81006	206	82.294	31.6764	91	-413	619	19.7242	93.0887	-1.66126	341810899	0.361635	1893.21	126.714	38.9125	-5.38295	2.4972	0.343848	0.755434	0.295855	0.942006	0.253239	0.858929	0.856648	0.998269	0.980468	-0.351271	0.818052	0.263101	11.2328	0.234985	2.69704	0.769247	0.332879	22.4655	2.33289	0.710262	5.91185	2309.44	0.0585483	47.2597	14264.7	0.842115
2159969	0	15	66	4526825247	1.07734	31	35.4708	486	41.3551	16.9747	44	-680	1166	12.5437	47.0086	-2.42512	4526825247	0.506919	499.56	236.757	9.90238	-0.538205	0.914671	0.208694	0.627573	0.201453	0.726944	0.166272	0.900213	0.89995	0.999639	0.991953	-0.301414	0.674591	0.197309	15.3812	0.357704	1.79592	0.756854	0.498876	30.7623	1.58941	0.280841	4.72467	280711	0.137032	39.6961	1.03843e+06	0.301742
2161829	0	48	97	49822223	0.857317	23	4.31944	124	75.6886	15.0576	79	-41	165	10.2057	78.1388	-0.967071	49822223	0.693961	376.9	8.93543	1.67868	-0.204738	0.519689	0.159933	0.528429	0.158968	0.630306	0.133858	0.920677	0.920613	0.990609	0.968239	-0.254237	0.575612	0.158123	2.97413	0.579821	1.43927	0.604327	0.754217	5.94827	1.27616	0.169905	4.58086	853.28	0.104569	41.6981	5662.72	0.181045
2163502	0	19.4	74	1078605	1.1125	21	5.3915	89	51.7224	16.9381	58	-41	130	9.77988	56.7425	-1.5363	1078605	0.536681	544.511	7.45162	2.69424	-0.964042	0.735562	0.350984	0.33859	0.313905	0.948839	0.245696	0.849228	0.846756	0.966613	0.923378	-0.125873	0.391568	0.28146	2.71197	0.41795	1.79204	0.375219	0.613404	5.42394	1.44961	0.271637	5.0423	14.8328	0.0442771	49.566	179.788	0.341368
2173380	0	19	113	82430541	1.8501	46	27.9503	181	69.2819	35.6943	83	-656	837	19.5931	91.1337	-3.98707	82430541	0.358712	3505.36	256.794	305.256	-21.8536	3.65801	0.723278	0.664386	0.43473	1.18944	0.528329	0.81186	0.806094	0.997851	0.977794	-0.257626	0.755626	0.323162	16.0018	0.200864	3.0285	0.736004	0.367687	32.0037	2.49701	1.09532	6.21293	410.039	0.0413137	47.9403	3560.22	1.51649
2179218	0	74	124	392226263	1.19323	21	13.4695	174	100.79	17.3551	106	-113	287	9.07212	104.46	-2.66376	392226263	0.525811	753.252	32.1659	10.8944	-2.32388	1.09374	0.286753	0.578132	0.267638	0.867453	0.211949	0.869148	0.868088	0.994318	0.966803	-0.218925	0.594746	0.252948	5.65366	0.389036	1.93359	0.651589	0.584332	11.3073	1.63775	0.345122	5.12968	2290.47	0.0637216	47.0895	18900.3	0.428132
2184336	0	44.4	98	6329615	1.01961	27	4.23111	140	74.4967	17.1255	78	-27	167	11.1355	77.827	-0.560022	6329615	0.624629	507.297	8.97882	2.0038	-0.0583825	0.5831	0.16365	0.552221	0.158737	0.6386	0.137809	0.921451	0.921123	0.99046	0.968416	-0.276359	0.606759	0.154437	2.9789	0.56389	1.49955	0.587274	0.743142	5.95779	1.33033	0.186688	4.89654	77.6373	0.0742941	50.3688	652.738	0.237619
2187468	0	17	101	253659112	1.47757	34	13.2156	142	67.4698	26.8052	78	-431	573	15.6384	77.4702	-2.2647	253659112	0.48852	1449.46	118.916	35.658	-4.39246	1.73569	0.339655	0.668847	0.289625	0.926976	0.252678	0.86174	0.859793	0.997691	0.977976	-0.286418	0.726148	0.259962	10.8888	0.359109	2.36133	0.734674	0.578933	21.7777	2.01453	0.518836	5.4902	2420.99	0.0572811	47.4883	20647.3	0.621196
2192423	0	27	64	144224742	1.09329	19	28.1907	106	45.3728	12.178	47	-216	322	8.05534	48.7565	-2.85094	144224742	0.496131	318.509	41.4587	4.13568	-0.352265	0.894799	0.227979	0.593068	0.225194	0.769672	0.175496	0.887844	0.887681	0.996497	0.975009	-0.271043	0.653347	0.222977	6.42588	0.328959	1.85478	0.704344	0.441081	12.8518	1.62898	0.280694	5.19792	4807.5	0.0792402	37.5726	30100.3	0.294376
2205490	1	8	52	500337273	0.833982	24	7.56544	172	29.352	14.6911	30	-121	293	9.92748	35.4975	-0.970926	500337273	0.705608	398.536	16.8012	2.36503	0.043031	0.512932	0.147732	0.550258	0.145804	0.599417	0.125651	0.927418	0.927291	0.99705	0.981801	-0.264726	0.567512	0.144132	4.08777	0.607704	1.33961	0.641423	0.771836	8.17555	1.18694	0.165166	3.8536	90897.9	0.228922	38.905	280176	0.187328
2211400	0	17	79	116347082	1.13832	33	2.66886	126	50.5672	19.0888	54	-48	174	13.8731	55.7418	-0.419941	116347082	0.488039	550.101	6.73587	1.87343	-0.460746	0.910202	0.259927	0.555604	0.25785	0.821395	0.191059	0.871421	0.871282	0.984747	0.948499	-0.227567	0.619895	0.256033	2.56384	0.316016	2.00117	0.559957	0.461275	5.12769	1.73371	0.292532	5.40896	2105.06	0.0562174	43.7316	18274.6	0.295606
2214411	0	20	78	4844925853	1.24859	27	6.67599	169	49.7346	17.8642	51	-344	513	11.7244	55.2649	-0.455304	4844925853	0.463611	580.682	72.9845	4.17836	-0.204639	1.04929	0.262111	0.599601	0.255863	0.823153	0.193348	0.873022	0.872682	0.997855	0.978717	-0.266904	0.675112	0.251142	8.53157	0.294878	2.11929	0.625356	0.385714	17.0631	1.84447	0.32785	5.34958	124681	0.078598	40.5304	735431	0.341227
2214962	0	23	64	208132801	1.12061	22	48.0123	132	41.7086	14.3608	42	-454	586	9.28063	47.1631	-3.81965	208132801	0.515944	484.747	128.304	10.6655	-0.666696	0.932453	0.216474	0.62122	0.20202	0.741362	0.174244	0.900929	0.900351	0.998733	0.985635	-0.299979	0.677744	0.193227	11.3192	0.377886	1.8115	0.689298	0.545498	22.6385	1.58925	0.287232	4.87272	11708.4	0.12513	43.7263	48276.9	0.32625
2219173	0	50	131	6681081	1.3962	45.25	3.42617	150	95.453	25.8136	102	-26	176	19.0658	100.612	-0.815034	6681081	0.42523	1011.57	12.6959	4.7713	-1.24799	1.22288	0.329263	0.570743	0.295652	0.93194	0.238956	0.857513	0.855535	0.987639	0.951506	-0.233916	0.649995	0.268728	3.53148	0.305009	2.21771	0.612116	0.484284	7.06297	1.86457	0.388036	5.51723	28.9879	0.043921	49.0381	280.652	0.468035
2221025	0	28	67	10020509	1.07219	19	4.54509	101	47.7843	12.2823	49	-33	134	8.39204	50.3989	-0.657714	10020509	0.490762	256.715	6.23313	0.853539	-0.0329986	0.678083	0.365979	0.298109	0.363631	0.926854	0.225432	0.818576	0.818419	0.978513	0.927352	-0.0934	0.347435	0.361576	2.48095	0.273158	1.99219	0.314402	0.327504	4.96189	1.61987	0.261016	5.42352	208.119	0.0527552	27.9235	1936.06	0.269134
2226602	0	6	87	10215859	1.25685	36	5.5451	106	55.3966	26.3629	67	-104	210	16.4394	65.5852	-1.59061	10215859	0.53513	1232.63	22.1721	13.0044	-3.15592	1.36527	0.254932	0.680598	0.226699	0.809999	0.20177	0.891204	0.889474	0.993236	0.968111	-0.298643	0.686136	0.203434	4.67911	0.461712	1.88808	0.700193	0.663515	9.35822	1.62427	0.405051	4.94185	188.832	0.079508	56.2825	1270.93	0.507947
2233813	0	19	60	123631416	1.13827	18	7.36781	112	41.7882	12.998	45	-102	214	7.74279	45.6678	-1.46668	123631416	0.504788	339.294	18.9179	1.87203	-0.00939693	0.77903	0.313121	0.424942	0.31136	0.883185	0.211158	0.844612	0.844496	0.991545	0.955551	-0.156356	0.504721	0.309838	4.33605	0.307823	2.01164	0.537151	0.464168	8.67211	1.69328	0.273038	5.47138	2928.03	0.0493931	34.6668	29923.8	0.291126
2239698	0	27	69	40697304	1.03616	20	5.90508	109	51.3985	13.3681	55	-102	211	8.67245	54.3843	-1.09675	40697304	0.526307	315.842	21.8401	1.55429	-0.545287	0.772604	0.19615	0.593496	0.1958	0.709378	0.156648	0.902158	0.902135	0.9947	0.972035	-0.27613	0.639062	0.195494	4.65789	0.394728	1.69917	0.613503	0.566421	9.31577	1.50207	0.242188	5.01726	1111.31	0.0807638	40.4385	7241.99	0.261482
2240480	0	20	83	11266284	1.16893	31	3.06144	129	54.6885	19.3362	58	-35	164	13.3953	59.8998	-0.463276	11266284	0.50455	597.153	7.37892	2.09605	-0.551198	0.852282	0.236764	0.562669	0.233888	0.789215	0.180804	0.883535	0.883343	0.986123	0.953318	-0.237182	0.624815	0.231372	2.68788	0.37333	1.91516	0.572632	0.559868	5.37576	1.6706	0.272261	5.33101	167.669	0.0533979	48.4489	1584.29	0.306143
2241429	0	66	106	50044561	0.830891	20	3.55701	129	86.5167	12.5222	87	-6	135	8.77333	87.9481	-0.403545	50044561	0.651789	249.725	10.3491	0.948839	0.432148	0.525728	0.190207	0.467617	0.189384	0.695164	0.152814	0.905445	0.905391	0.988826	0.962151	-0.192375	0.498825	0.188663	3.20393	0.502056	1.46673	0.4753	0.685336	6.40786	1.27357	0.178984	4.73376	581.982	0.0899509	42.8017	4217.07	0.182502
2249864	0	25	68	159340773	1.18403	21	26.9302	137	47.4057	14.4987	50	-251	388	8.78589	52.3376	-3.10487	159340773	0.476743	491.923	56.6898	9.78524	-1.37086	1.0052	0.282227	0.559522	0.278382	0.853382	0.201628	0.861424	0.861193	0.996562	0.972196	-0.223132	0.614377	0.275257	7.51724	0.297865	2.02149	0.771118	0.409607	15.0345	1.73929	0.321855	5.4794	3131.68	0.0538366	37.4703	27732.1	0.355414
2251867	0	33	79	98663351	0.986482	22	14.0265	126	57.1483	14.6867	60	-228	354	9.38524	60.7148	-1.74677	98663351	0.585212	420.36	45.5473	3.40776	-0.904596	0.698229	0.213424	0.528796	0.205252	0.741856	0.169781	0.898553	0.898166	0.996734	0.97728	-0.220249	0.560833	0.199651	6.73988	0.459215	1.62905	0.544666	0.647703	13.4798	1.41058	0.227913	4.75781	2408.7	0.0899945	42.0242	15663.2	0.258618
2254249	0	20	69	128838137	1.22841	24	12.1152	111	44.7595	16.1367	48	-249	360	10.2966	50.2051	-1.87138	128838137	0.463755	517.143	41.6959	4.58967	-0.704471	0.968949	0.311013	0.512225	0.306639	0.887224	0.212615	0.847365	0.847116	0.995222	0.965976	-0.198277	0.587193	0.303218	6.44448	0.27627	2.11399	0.64748	0.347617	12.889	1.79812	0.31999	5.62984	2486.65	0.0486482	37.4589	23704.9	0.352379
2260638	0	9	57	852433987	1.0159	24	26.6447	119	33.8413	15.6067	36	-414	533	10.3563	40.6338	-2.74072	852433987	0.606413	505.872	103.462	8.32324	-0.618949	0.74032	0.244473	0.500917	0.23675	0.794743	0.185849	0.882759	0.88239	0.998317	0.98183	-0.196164	0.540224	0.231385	10.1655	0.447179	1.75266	0.696901	0.642872	20.331	1.50728	0.246198	4.84211	45027.4	0.0872152	42.5219	313079	0.276656
2261912	0	32	72	215226536	0.979062	19	6.97504	117	53.9436	12.681	56	-100	217	8.13795	56.6563	-1.29178	215226536	0.559962	300.033	13.786	1.70184	-0.648256	0.703769	0.209778	0.539435	0.209504	0.732529	0.164042	0.895293	0.895275	0.991934	0.965089	-0.234517	0.580131	0.209267	3.69627	0.418782	1.64817	0.600885	0.60195	7.39254	1.43749	0.228387	4.86238	5943.41	0.0886415	40.3218	37545.5	0.245726
2266765	0	27.4	71	1501914	1.08486	22	7.27838	90	51.6577	14.7518	55	-53	143	8.90492	55.6483	-1.71622	1501914	0.528749	428.209	13.8895	1.8048	-0.671956	0.635816	0.332743	0.304113	0.301028	0.931581	0.238513	0.85466	0.852658	0.981015	0.940839	-0.104277	0.373785	0.274335	3.71658	0.409104	1.76066	0.355963	0.600468	7.43315	1.42363	0.24214	5.0371	21.1443	0.0435966	52.1758	256.443	0.300929
2267507	0	4	61	175518531	1.25212	29	18.1007	138	32.1264	19.5087	35	-343	481	12.0253	43.2286	-2.49398	175518531	0.525341	836.603	66.8187	16.4493	-1.87903	1.08004	0.348388	0.508301	0.328613	0.94585	0.235402	0.838822	0.837667	0.996564	0.970274	-0.171153	0.548223	0.312855	8.16307	0.340414	2.1708	0.725195	0.538982	16.3261	1.80544	0.357106	5.42578	4426.96	0.047133	43.1123	49342.6	0.414783
2271813	1	16	65	1777640135	1.06927	27	32.3842	159	40.9476	15.898	42	-579	738	10.9686	46.5268	-2.56915	1777640135	0.524967	488.032	177.955	8.2437	-0.411299	0.879892	0.214255	0.60709	0.206009	0.739025	0.170018	0.898117	0.897786	0.999168	0.987908	-0.282692	0.654186	0.200951	13.3337	0.376472	1.7847	0.714946	0.542259	26.6674	1.57112	0.273537	4.79742	104974	0.127833	40.2189	431092	0.298997
2272133	0	12	66	3329829	1.11926	29	2.64658	84	41.455	16.641	45	-31	115	12.4658	46.1268	-0.503519	3329829	0.490939	409.173	6.05485	1.27964	-0.00231332	0.833912	0.258864	0.525497	0.258478	0.819998	0.190511	0.870826	0.8708	0.974131	0.9354	-0.208557	0.593578	0.25814	2.43121	0.306146	1.94324	0.527742	0.411514	4.86242	1.68296	0.273194	5.48277	75.1904	0.048045	37.5745	768.32	0.2839
2284487	0	24	119	308718067	1.71253	40	5.85469	159	81.644	30.3014	94	-124	283	18.7542	91.2393	-1.60102	308718067	0.353632	1658.87	27.9077	28.2658	-4.58751	2.37494	0.356552	0.736421	0.323201	0.964428	0.248318	0.843503	0.841719	0.992966	0.960048	-0.325453	0.797102	0.298207	5.23476	0.214754	2.70545	0.778267	0.322065	10.4695	2.32067	0.682872	6.0199	1851.66	0.0499302	44.0544	13114.4	0.800697
2288518	0	14	74	2202905048	1.21609	35	19.7437	224	44.7754	19.6529	47	-684	908	14.0057	51.5887	-1.33078	2202905048	0.471737	656.56	238.968	8.36417	-0.458208	1.04366	0.223645	0.645946	0.211073	0.754795	0.17725	0.896061	0.895583	0.999384	0.989474	-0.319747	0.716917	0.203828	15.452	0.326853	1.97641	0.684192	0.424899	30.9039	1.74266	0.316827	5.0158	101094	0.122134	41.8644	390468	0.343055
2289943	0	45	105	72858928	1.26352	27	8.28011	135	77.6783	19.7149	83	-101	236	12.0745	82.4989	-1.84393	72858928	0.538183	772.15	25.8993	8.4151	-1.2262	1.06387	0.271384	0.589272	0.264127	0.843742	0.198967	0.869134	0.868662	0.992696	0.962397	-0.251755	0.654436	0.257891	5.06962	0.391884	2.05664	0.727873	0.600887	10.1392	1.77497	0.333812	5.38037	588.914	0.055013	44.5446	5761.25	0.38682
2291606	0	8	54	493043654	0.843128	25	6.37804	162	28.7889	15.2491	27	-144	306	10.4598	35.1105	-0.34075	493043654	0.690052	403.949	17.0448	2.24786	0.218063	0.547193	0.138304	0.594692	0.136861	0.573794	0.118682	0.931806	0.931714	0.997237	0.982912	-0.302846	0.60634	0.135637	4.11614	0.593965	1.3469	0.640263	0.760868	8.23228	1.2058	0.171374	3.76891	101704	0.254289	36.9947	275990	0.188906
2297411	0	59	91	139466203	0.409066	16	18.9798	138	74.9259	10.5774	76	-141	279	6.91673	76.4058	-2.15097	139466203	0.882454	223.963	24.853	1.19798	-0.23897	0.170461	0.0738115	0.388416	0.0717214	0.372805	0.068456	0.964456	0.964347	0.998016	0.98979	-0.169325	0.319834	0.0701846	4.98285	0.836057	0.653227	0.598413	0.913572	9.9657	0.577824	0.061068	3.01334	7607.54	0.318441	35.6422	21081.8	0.0758042
2298013	0	47	77	73380126	0.617271	15	3.58823	115	61.2992	9.30585	61	0	115	6.5987	62.4341	0.01305	73380126	0.745426	140.419	3.45642	0.504907	-0.304826	0.318919	0.194995	0.241123	0.194977	0.700559	0.154947	0.902515	0.902513	0.980501	0.951257	-0.082187	0.249987	0.194961	1.85079	0.588756	1.1864	0.241419	0.751779	3.70159	0.9913	0.128479	4.41526	1449.14	0.0769796	40.9159	14032.6	0.127737
2301511	0	23	73	11374186	1.07089	24	3.65067	94	50.751	15.2985	54	-28	122	10.4459	54.4245	-0.818569	11374186	0.507829	386.359	7.00751	1.57761	-0.533736	0.791629	0.2384	0.535911	0.238154	0.785227	0.179835	0.880964	0.880948	0.976171	0.940474	-0.221417	0.590525	0.237939	2.62089	0.353695	1.81453	0.54555	0.519325	5.24177	1.57537	0.257507	5.37862	195.485	0.0509075	42.9542	1950.06	0.276647
2302614	0	20.9	91	75211163	1.18738	30	7.78233	127	61.6634	23.6564	71	-110	237	13.3055	70.3659	-2.00181	75211163	0.591829	1148.99	23.1779	14.8361	-3.12646	1.22844	0.227582	0.681356	0.201566	0.758795	0.18547	0.903359	0.901819	0.993969	0.97166	-0.300964	0.672698	0.180638	4.78825	0.521248	1.78346	0.71452	0.713206	9.5765	1.54452	0.364005	4.61421	1856.07	0.12219	54.0195	8989.89	0.468756
2304502	0	-107	188.1	8612756	3.08538	110.25	3.87737	371	54.8407	83.3572	58.5	-314	685	51.1434	126.292	-0.457169	8612756	0.156962	12942	83.7759	905.009	-22.9888	15.5161	3.3651	0.636384	1.27775	2.10697	1.64575	0.585805	0.541628	0.985957	0.927019	-0.212548	0.826814	0.419375	8.98421	0.0424094	5.44057	0.682516	0.110728	17.9684	3.88324	4.7203	6.42482	42.0444	0.0778601	20.4215	84.7593	5.22775
2305246	0	26	112	181222819	1.63746	48	4.14427	157	74.0943	27.88	82	-101	258	19.9625	81.8508	-0.946276	181222819	0.368114	1209.58	25.6233	12.2298	-1.30256	1.9423	0.310574	0.723557	0.297626	0.899885	0.218289	0.853277	0.852481	0.993821	0.962974	-0.339841	0.804959	0.286937	5.02149	0.215347	2.65608	0.748109	0.374556	10.043	2.32171	0.563217	6.01624	1354.24	0.0500643	40.0884	9957.49	0.598238
2306664	0	52	107	44291004	1.16082	27	3.80925	130	83.0126	17.012	88	-26	156	11.8414	85.7748	-0.913208	44291004	0.533888	466.214	10.2912	2.21657	0.0158125	0.805759	0.293451	0.464833	0.292226	0.864486	0.204789	0.854091	0.854009	0.98276	0.941596	-0.176779	0.550052	0.291155	3.18794	0.347227	2.03244	0.559368	0.545229	6.37588	1.73487	0.274803	5.45856	284.501	0.0472594	37.3737	3214.01	0.29233
2311332	0	19	70	2937683	1.04524	27	2.85935	100	44.6842	15.701	45	-20	120	11.2858	48.7718	-0.0848373	2937683	0.507066	382.012	6.14722	0.87282	0.0667005	0.742861	0.283846	0.44705	0.283223	0.8529	0.201148	0.858492	0.858451	0.983314	0.943376	-0.157479	0.509365	0.282678	2.45605	0.300307	1.90441	0.454857	0.396184	4.91211	1.61844	0.256677	5.38063	59.936	0.0485312	34.7749	626.226	0.257814
2312860	0	55	107	79900478	1.23636	23	13.5299	144	83.2074	17.6188	89	-130	274	10.2882	87.2952	-2.49754	79900478	0.529609	696.978	26.8665	9.94265	-1.25303	1.00825	0.323332	0.510112	0.307623	0.914916	0.224852	0.848655	0.847757	0.991337	0.956327	-0.184425	0.564967	0.295299	5.16673	0.352668	2.10215	0.682726	0.552026	10.3335	1.77036	0.332894	5.50175	478.973	0.0456818	43.8318	5552.95	0.384103
2324166	0	49	95	293775147	1.12284	19	42.7758	192	59.1131	37.636	77	-983	1175	8.34396	110.973	-5.89277	293775147	0.705859	8820.68	475.869	3195.69	-137.116	7.50551	1.34837	0.681234	0.310901	0.889624	1.24762	0.90932	0.903511	0.997905	0.988855	-0.286916	0.645101	0.116281	21.7791	0.647597	1.66822	0.758425	0.80254	43.5582	1.36173	2.21347	3.99445	5432.86	0.227745	62.5142	16838.3	3.51357
2334476	0	10	75	4313251	1.20848	35	2.97981	91	49.1766	20.7731	57	-27	118	14.9138	55.3086	-0.898086	4313251	0.481347	640.706	7.03205	3.38499	-1.09821	1.04213	0.203292	0.667949	0.194692	0.721105	0.163343	0.904088	0.903514	0.980068	0.951757	-0.339689	0.713452	0.187166	2.61188	0.38948	1.83009	0.682521	0.571917	5.22377	1.61185	0.311354	5.1796	96.0993	0.0681555	46.2398	678.699	0.364379
2337497	0	8	75	22265052	1.30986	27	6.04907	110	47.303	21.1668	55	-100	210	12.7403	55.532	-1.57994	22265052	0.471313	846.224	13.1444	7.42884	-1.89548	1.19138	0.302102	0.589914	0.288108	0.893449	0.216418	0.858254	0.857346	0.988495	0.952313	-0.22567	0.627656	0.276098	3.59467	0.339795	2.10172	0.62579	0.532572	7.18934	1.7829	0.37337	5.36267	359.381	0.0497757	48.0603	3402.88	0.455137
2340341	0	53	95	21464090	0.836901	20	14.4633	169	72.8791	15.6411	76	-91	260	8.67651	77.0552	-2.53343	21464090	0.738454	626.142	15.7839	7.64185	-1.38587	0.637786	0.161955	0.582958	0.142307	0.605731	0.140544	0.931938	0.930811	0.995716	0.980013	-0.273071	0.555123	0.126849	3.95789	0.67464	1.2614	0.670425	0.818514	7.91577	1.10455	0.199935	4.20485	533.92	0.147696	51.2727	2669.51	0.255013
2343562	0	56	116	42378350	1.36821	31	6.55142	225	88.3185	20.1757	93	-60	285	13.2079	92.4339	-1.04922	42378350	0.443919	743.856	19.2819	5.86512	-0.630272	1.18125	0.358356	0.531065	0.32983	0.963744	0.244604	0.839642	0.837935	0.992907	0.959161	-0.20196	0.61346	0.306713	4.36758	0.258972	2.34774	0.570553	0.373363	8.73516	1.97321	0.384901	5.69525	227.917	0.045951	38.0253	2201.84	0.422096
2344319	0	0	110	13211737	1.92366	51	3.54853	223	52.3053	33.3434	51	-98	321	22.0232	68.2057	0.0533166	13211737	0.314373	1916.18	14.0211	23.7159	0.121384	2.67969	0.459484	0.705525	0.40982	1.07454	0.285466	0.80317	0.800056	0.990932	0.949456	-0.28514	0.795802	0.36823	3.66947	0.160918	3.19454	0.711674	0.270988	7.33894	2.67641	0.784795	6.19635	133.177	0.0468932	34.9029	892.82	0.854493
2345542	0	45	74	240672229	0.693654	15	13.2089	109	59.4303	9.87345	61	-90	199	6.20841	61.1322	-2.0563	240672229	0.723057	205.186	14.8621	1.31048	-0.548346	0.392849	0.164653	0.404759	0.163185	0.639113	0.13681	0.918651	0.918554	0.993679	0.972837	-0.156294	0.398454	0.161913	3.84773	0.615489	1.17141	0.465833	0.773379	7.69545	1.00428	0.139376	4.02069	9682.48	0.150349	43.2859	46564.9	0.160132
2346863	0	34	76	109917452	1.00046	20	35.6715	123	55.5486	13.7912	58	-401	524	8.71679	59.0668	-2.89862	109917452	0.567093	403.237	114.817	6.07355	-1.13315	0.787452	0.188691	0.611479	0.176983	0.682908	0.156408	0.912924	0.912563	0.998708	0.986444	-0.297679	0.648703	0.170998	10.7083	0.448527	1.61355	0.6267	0.630619	21.4166	1.42656	0.244036	4.78644	3425.44	0.108727	40.759	17866.3	0.271442
2353123	0	47	108	175189633	1.33456	31	6.67993	136	81.0323	20.1739	87	-96	232	13.221	85.3753	-1.50506	175189633	0.481487	722.707	17.6316	6.45829	-0.761853	1.14155	0.297419	0.584692	0.286165	0.881715	0.212259	0.85872	0.858043	0.98866	0.952569	-0.245249	0.665086	0.277005	4.17376	0.313819	2.22784	0.662488	0.508809	8.34753	1.91289	0.359742	5.65432	1177.85	0.0490054	39.5558	11572.5	0.400703
2354804	0	-8	38.9	75841	0.942711	24.25	3.03339	56	17.0625	15.6998	20	-40	96	10.7428	26.0221	-0.524026	379205	0.61942	386.023	3.6266	1.33865	-0.413052	0.569188	0.186057	0.504851	0.186057	0.686476	0.150072	0.906972	0.906972	0.981394	0.953486	-0.248985	0.574061	0.186057	1.87903	0.516781	1.53305	0.580153	0.70344	3.75805	1.34699	0.188811	3.15647	19.4464	0.173629	4.05102	69.375	0.212293
2356979	0	29	95	36212189	1.43202	30	23.7108	458	69.9177	25.1418	69	-105	563	13.336	83.3698	3.34705	36212189	0.515105	2062.04	25.45	191.66	17.065	2.92706	0.552223	0.682385	0.308775	1.00272	0.453072	0.871734	0.866623	0.996921	0.97897	-0.288675	0.725401	0.209156	4.98556	0.410732	2.32641	0.714497	0.623898	9.97112	1.94909	0.86982	5.29076	365.466	0.070147	57.3728	2683.7	0.866677
2358887	0	36	80	155809223	0.712899	17	6.18001	110	62.2187	13.4191	67	-106	216	7.71718	65.0423	-1.63197	155809223	0.721859	359.337	23.7372	1.69958	-0.728148	0.446052	0.0889913	0.66288	0.0874185	0.42972	0.081184	0.956547	0.956448	0.997602	0.987539	-0.375155	0.600349	0.0860944	4.86291	0.698329	0.982933	0.669382	0.829778	9.72581	0.890523	0.133761	3.17103	12864	0.349282	37.7029	26586.1	0.17022
2367485	0	21	68	24294205	1.13658	23	5.5772	94	47.4466	14.8776	51	-112	206	9.91457	51.29	-1.19781	24294205	0.482626	379.49	20.9275	1.79771	-0.456757	0.861718	0.250779	0.547541	0.24855	0.806701	0.186595	0.876092	0.875948	0.990373	0.958628	-0.228464	0.608012	0.246643	4.55792	0.32231	1.91146	0.555359	0.4584	9.11583	1.65598	0.278124	5.29921	590.7	0.0639632	43.7653	4457.05	0.301927
2373966	0	49	99	701581190	0.947387	26	7.29727	147	75.6002	16.0912	78	-188	335	10.9853	78.5212	-1.19685	701581190	0.664292	450.192	36.0795	2.68444	-0.254842	0.62129	0.185409	0.538702	0.17912	0.68543	0.152047	0.911423	0.911066	0.996309	0.977695	-0.249447	0.590028	0.174211	5.99754	0.539404	1.59278	0.597099	0.725565	11.9951	1.39646	0.201675	4.51308	14835.2	0.130374	41.9265	75589.8	0.219422
2379113	1	43	70	551776639	0.806647	14	123.725	110	56.3828	8.65492	57	-529	639	5.83509	57.7024	-4.05629	551776639	0.640637	150.552	163.165	3.48048	-0.604681	0.501559	0.228908	0.372277	0.227462	0.764588	0.174789	0.886441	0.886395	0.998839	0.984841	-0.128992	0.394638	0.226719	12.7709	0.475543	1.47304	0.812981	0.659572	25.5419	1.24388	0.182617	4.68757	13608	0.0821142	42.3831	106166	0.191591
2382057	0	9.9	63.3	204094	1.28451	32.5	3.02545	85	42.6818	18.0496	50.5	-14	99	12.2	48.1586	-0.816068	1020470	0.442924	497.512	6.5038	2.477	-0.674072	0.949376	0.382805	0.420871	0.375956	0.948187	0.233312	0.813164	0.812707	0.962036	0.906354	-0.165137	0.556342	0.369963	2.5223	0.268053	2.17489	0.500744	0.408161	5.0446	1.78357	0.333045	3.70261	12.9318	0.146952	4.02841	38.9773	0.383135
2383326	0	32	68	45480091	1.05888	18	24.3608	115	50.8868	12.063	53	-205	320	7.65365	53.7452	-2.42577	45480091	0.510539	299.073	43.8878	2.48038	-0.56963	0.764177	0.272091	0.473166	0.264874	0.835972	0.199533	0.868434	0.868225	0.995837	0.97064	-0.177786	0.531473	0.261281	6.61549	0.337671	1.84716	0.507393	0.495676	13.231	1.57796	0.259067	5.31956	827.237	0.0525397	39.6013	8038.44	0.282115
2384742	0	36	67	771154165	1.06362	15	445.445	127	50.7076	12.1232	54	-1007	1134	6.55751	60.3133	-17.5875	771154165	0.53322	1066.43	512.681	607.057	-20.1505	1.48106	0.339891	0.617529	0.265975	0.845535	0.265896	0.871798	0.871264	0.999429	0.989453	-0.197457	0.553163	0.250834	22.6362	0.364112	1.83349	0.787366	0.538918	45.2723	1.56209	0.455238	5.14318	14471.3	0.0682639	41.1308	113037	0.59796
2396094	0	28	63	230315049	1.15748	17	53.6409	102	44.4965	12.4977	47	-321	423	7.3194	49.5862	-5.17875	230315049	0.487125	478.856	70.6597	15.524	-1.65057	0.984417	0.330025	0.495103	0.319525	0.912146	0.22306	0.841823	0.841282	0.996741	0.971029	-0.174401	0.540965	0.311853	8.3962	0.288307	2.04226	0.761681	0.405181	16.7924	1.71607	0.328611	5.54117	4613.1	0.0492484	36.4276	45629	0.367271
2399146	0	27	75	78151220	1.14064	21	54.7062	590	56.9103	16.9616	60	-326	916	9.4623	64.7768	3.69032	78151220	0.554516	957.258	77.4633	76.9606	5.10337	1.44552	0.317552	0.638477	0.225748	0.812394	0.264851	0.896728	0.894891	0.999139	0.988911	-0.28574	0.665789	0.189454	8.78527	0.448919	1.82961	0.708985	0.641995	17.5705	1.59147	0.440768	4.82618	1792.7	0.0962524	47.465	10327.9	0.46758
2405892	0	20	66	136205950	1.12182	24	24.1607	122	41.9448	15.5272	43	-251	373	10.0383	47.7591	-2.66937	136205950	0.511221	521.564	54.0321	6.86451	-0.648934	0.83067	0.341036	0.414915	0.330343	0.924596	0.2269	0.836442	0.835891	0.995854	0.96706	-0.13735	0.47145	0.322531	7.34232	0.307137	2.01494	0.659985	0.460568	14.6846	1.67361	0.292927	5.47813	2811.68	0.047085	38.4658	30527.5	0.328214
2407028	0	38	71	174072416	0.944746	16	16.9195	134	54.7651	10.61	55	-257	391	7.01512	56.6507	-1.30508	174072416	0.562989	210.086	59.38	1.46317	-0.509584	0.666918	0.211256	0.517944	0.208677	0.735592	0.165841	0.896013	0.895909	0.997428	0.979154	-0.222882	0.562051	0.207094	7.69844	0.415083	1.62543	0.588548	0.595003	15.3969	1.41248	0.219544	4.94026	4481.29	0.0826197	40.6623	30536.5	0.231283
2415117	0	-195.2	45	6029074	2.44494	64	4.82154	73	-36.8064	67.1646	-9	-351	424	36.3357	98.2167	-1.60035	6029074	0.250739	8291.81	65.563	455.55	-44.8732	9.76753	1.32184	0.745706	0.712949	1.49943	0.725062	0.726333	0.703516	0.987516	0.939527	-0.38834	0.899899	0.35022	7.96499	0.121156	3.79661	0.800785	0.229502	15.93	3.15045	2.77234	6.16452	31.3904	0.0502246	33.0321	156.712	3.34803
2415148	0	44	70	36278141	0.861507	13	10.7589	102	55.5296	8.37652	55	-64	166	5.54657	56.7362	-0.851888	36278141	0.607946	135.46	13.9354	0.830081	-0.392176	0.536518	0.27766	0.31788	0.276881	0.839379	0.197269	0.861689	0.861637	0.989327	0.953872	-0.100823	0.353254	0.276199	3.72434	0.406152	1.63902	0.347409	0.589067	7.44868	1.35964	0.203545	5.05481	587.215	0.0521043	35.3536	6851.55	0.203534
2415387	0	40	91	127195940	0.820385	21	8.2698	118	69.5048	16.8688	76	-88	206	9.80165	73.5625	-1.99508	127195940	0.71863	580.527	15.2081	3.33007	-0.961165	0.532583	0.140838	0.574066	0.133222	0.577077	0.122647	0.934634	0.934151	0.994647	0.977976	-0.262407	0.546559	0.126788	3.88717	0.664787	1.22323	0.609462	0.811119	7.77434	1.0751	0.168355	3.80151	4881.73	0.207689	46.0111	16891.4	0.221691
2416007	0	22.4	95	12981784	1.23113	35	3.89405	126	64.5621	22.1791	71	-61	187	15.0466	70.4582	-0.9838	12981784	0.538736	796.083	14.9408	4.28687	-0.870442	0.92024	0.283741	0.524547	0.266014	0.870425	0.211136	0.869948	0.868766	0.989228	0.956086	-0.203223	0.592022	0.250502	3.84464	0.413321	2.03153	0.557182	0.623836	7.68928	1.73112	0.300995	5.30727	119.998	0.0458884	50.2511	1408.8	0.351179
2429211	0	21	68	79678671	1.25087	21	8.7682	104	46.2995	15.8331	51	-110	214	9.11239	51.739	-1.8981	79678671	0.46065	533.28	20.4778	4.22558	-0.933244	0.99437	0.332646	0.495954	0.326899	0.914239	0.220895	0.8375	0.837125	0.991034	0.953402	-0.18181	0.565774	0.321951	4.50691	0.274536	2.15208	0.612731	0.396561	9.01382	1.80872	0.331754	5.61907	1409.5	0.0473542	36.2918	13711.3	0.372659
2430048	0	60	124	127900636	1.24234	33	4.09308	147	97.3075	20.2004	104	-50	197	13.8412	100.632	-1.06454	127900636	0.467426	657.979	13.0766	3.92497	-1.18127	1.09638	0.21843	0.665055	0.213437	0.753839	0.171168	0.894086	0.893781	0.987246	0.957476	-0.317482	0.708801	0.209326	3.58564	0.361554	1.92396	0.671104	0.541782	7.17128	1.69522	0.328703	5.03283	1102.44	0.0872871	45.6857	5903.59	0.376147
2431964	0	21	77	44514794	1.11334	22	8.57195	126	54.0022	17.7289	60	-136	262	10.1021	59.7714	-1.90231	44514794	0.566319	656.373	22.4423	6.53562	-1.81328	0.998893	0.174929	0.698933	0.167549	0.664359	0.146248	0.917389	0.916962	0.995307	0.976193	-0.349307	0.704631	0.161709	4.71553	0.48844	1.65523	0.717526	0.677885	9.43105	1.47165	0.293456	4.60489	1732.06	0.13901	45.3225	7056.33	0.355268
2432414	0	24	63	56505198	1.11202	19	6.93302	97	44.0306	12.6024	46	-99	196	8.13104	47.2963	-1.21035	56505198	0.495529	298.246	11.6075	1.37172	0.00104849	0.734072	0.337294	0.369027	0.335704	0.906529	0.218886	0.832413	0.832307	0.980187	0.932912	-0.124265	0.439689	0.334313	3.39239	0.287663	2.00912	0.53535	0.412786	6.78478	1.66712	0.267841	5.51728	1214.8	0.0480918	34.0922	12517.1	0.282169
2432700	0	6	56	7093688	1.08663	26	3.42221	90	34.8489	15.8301	40	-49	139	11.2141	40.0613	-0.829019	7093688	0.556143	390.463	5.02604	1.86872	0.133877	0.748358	0.259501	0.484022	0.259168	0.815501	0.189515	0.870472	0.87045	0.974065	0.935225	-0.19644	0.563043	0.258876	2.21444	0.37706	1.89806	0.541286	0.572531	4.42887	1.6372	0.251965	5.37363	219.769	0.0497214	37.4907	2458.15	0.263205
2438874	0	40	70	550399998	0.943804	14	72.6588	187	55.1229	10.9833	57	-405	592	6.19744	58.8431	-6.02143	550399998	0.61364	423.971	115.653	15.8506	-2.18755	0.826201	0.210019	0.590345	0.191784	0.722114	0.172063	0.906524	0.905849	0.998772	0.986383	-0.259549	0.603059	0.181143	10.7471	0.477193	1.58317	0.72086	0.66309	21.4941	1.38006	0.259055	4.5647	21193.3	0.133325	40.4815	97544.1	0.300612
2442314	0	29	71	59214165	1.12609	21	9.49477	110	49.2005	13.6904	49	-142	252	8.61083	52.7444	-0.928495	59214165	0.483663	361.276	20.3848	2.12321	-0.224869	0.867462	0.254882	0.545154	0.25134	0.815627	0.189361	0.87492	0.874684	0.993126	0.964158	-0.228571	0.61381	0.248241	4.49796	0.308189	1.94805	0.648446	0.381029	8.99591	1.68519	0.280586	5.43778	1211.88	0.0569359	38.8608	10294.8	0.292559
2443125	0	81	147	45893593	1.28884	33	33.2161	207	114.717	21.4902	118	-363	570	13.8763	118.924	-3.11503	45893593	0.528117	982.85	118.738	22.7097	-2.2364	1.08089	0.32099	0.5363	0.275313	0.889891	0.243185	0.867428	0.86618	0.998147	0.980526	-0.207883	0.603355	0.254173	10.888	0.401136	2.09238	0.68098	0.613958	21.7759	1.78596	0.35047	5.36731	157.134	0.0484235	50.1907	1713.74	0.454712
2444030	0	42	172.2	21535964	1.80414	28.5	14.35	583	92.0137	47.928	69	0	583	16.9089	121.661	3.15753	21535964	0.446991	6334.82	8.49889	1129.71	86.6827	10.0191	1.33795	0.765885	0.549617	1.41758	1.0201	0.808796	0.793294	0.991506	0.961517	-0.323872	0.824606	0.236689	2.51532	0.32338	3.07805	0.79815	0.555278	5.03065	2.50685	2.83926	5.68257	66.8282	0.04593	60.8565	650.372	2.51855
2449189	0	15	97	533323276	1.52349	47	136.98	1301	61.7427	28.2444	67	-118	1419	19.1862	77.2264	6.90827	533323276	0.441751	2151.76	23.3765	1331.6	40.0501	3.043	0.40768	0.763329	0.260389	0.877912	0.33723	0.881105	0.879124	0.999561	0.991728	-0.362295	0.802426	0.219395	4.7663	0.314283	2.41288	0.815703	0.50389	9.5326	2.10415	0.86267	5.47008	7365.64	0.0823667	46.6258	39503.6	0.885929
2455532	0	24	73	113583487	1.14963	21	25.7735	104	50.8108	16.8781	56	-254	358	9.33538	57.5916	-3.60117	113583487	0.532348	735.05	58.8882	20.0257	-3.15408	1.1487	0.238817	0.651073	0.225206	0.78873	0.186379	0.889468	0.888753	0.997103	0.9776	-0.276306	0.653401	0.215125	7.65902	0.412468	1.81729	0.757587	0.604308	15.318	1.5797	0.34688	4.99375	2840.5	0.0829464	46.207	18230.3	0.422606
2462664	0	32	87	6113626	0.919576	28	3.04125	104	61.654	16.5011	64	-13	117	11.7414	65.0452	-0.580026	6113626	0.606069	429.67	8.04474	1.02734	-0.424365	0.496339	0.198873	0.421319	0.198067	0.717039	0.158843	0.901101	0.901047	0.988316	0.960413	-0.158575	0.458228	0.197362	2.82312	0.518867	1.47621	0.432328	0.701965	5.64623	1.27545	0.173803	4.74699	88.9529	0.0615591	52.3751	875.77	0.212648
2465194	0	22	70	58516611	1.19505	24	14.5077	123	46.3345	15.9981	49	-193	316	10.2038	51.6265	-1.91394	58516611	0.473496	518.407	30.2602	4.57747	-0.615186	0.955358	0.28297	0.540979	0.272551	0.860485	0.205895	0.86533	0.86476	0.994371	0.966071	-0.215738	0.607336	0.264629	5.48561	0.29667	2.04447	0.596925	0.374297	10.9712	1.75499	0.309582	5.4678	1202.64	0.0547773	39.1444	10395.6	0.342386
2466722	0	12	83	16200292	1.48989	31	13.3169	120	45.8258	24.391	52	-222	342	13.7088	59.3126	-2.46924	16200292	0.432856	1417.97	43.0967	32.1519	-4.53988	1.78447	0.3428	0.666775	0.290471	0.935303	0.25421	0.862854	0.859986	0.994816	0.968291	-0.304196	0.739891	0.250575	6.53724	0.296656	2.3426	0.718412	0.460705	13.0745	2.028	0.531817	5.61827	236.16	0.0512834	50.0558	1993.3	0.666188
2473903	0	30	82	37905564	1.2664	21	30.231	395	58.0101	17.58	57	-149	544	9.58059	65.3717	3.13705	37905564	0.501947	908.28	23.0875	42.5857	4.00292	1.45094	0.309079	0.648197	0.256385	0.87072	0.241405	0.878478	0.876784	0.997512	0.978946	-0.27696	0.687753	0.228173	4.77514	0.365893	2.0695	0.735963	0.557644	9.55027	1.80101	0.440006	5.3222	559.689	0.0630991	46.5725	4452.27	0.460742
2478153	0	25	109	291487298	1.5603	45	13.5454	164	67.4412	26.8994	72	-518	682	18.887	76.004	-1.39587	291487298	0.404648	1228.28	165.964	17.5796	-1.04322	1.73741	0.250687	0.746728	0.21808	0.785406	0.201579	0.894864	0.893829	0.998903	0.986479	-0.414194	0.839723	0.201299	12.8683	0.285086	2.39127	0.789921	0.471662	25.7365	2.13185	0.497024	5.49219	5191.5	0.102884	45.758	20418.5	0.557608
2478211	0	15	82	8489357	1.4259	27	13.3736	117	49.8106	23.8259	58	-214	331	12.2531	62.4035	-2.62153	8489357	0.479048	1413.11	44.5313	31.6494	-4.94316	1.66516	0.35736	0.629821	0.297998	0.945974	0.262363	0.860013	0.856913	0.994609	0.967527	-0.267944	0.675285	0.254206	6.64849	0.371084	2.19405	0.665472	0.576926	13.297	1.87763	0.50563	5.2352	117.823	0.0540472	53.6864	1044.32	0.662666
2480302	0	32	75	66122405	0.869369	19	6.32386	98	57.1346	13.5308	61	-78	176	8.36385	60.0529	-1.50947	66122405	0.628156	341.986	14.4593	1.48805	-0.68661	0.564248	0.157201	0.560422	0.152644	0.623725	0.133287	0.924429	0.924134	0.990835	0.969622	-0.262395	0.568437	0.148734	3.78912	0.551208	1.34145	0.573505	0.724919	7.57823	1.17608	0.180362	4.20047	3061.37	0.166969	46.2124	11517.2	0.215198
2481220	0	39	73	59241660	0.865247	16	21.8755	159	57.4539	11.2706	59	-217	376	6.92441	59.7302	-1.60507	59241660	0.636325	266.75	46.4213	2.1259	-0.618088	0.566601	0.153441	0.571539	0.145642	0.601494	0.131678	0.927992	0.927833	0.998151	0.985495	-0.292988	0.604542	0.142547	6.80573	0.549783	1.36352	0.602612	0.723675	13.6115	1.21076	0.180011	4.28418	2696.75	0.162406	42.174	10566.2	0.205147
2482765	0	39.9	83	34953196	1.02716	20	28.0454	373	62.1199	15.2163	62	-48	421	8.55233	66.7706	2.3117	34953196	0.621745	599.434	8.3756	14.9014	1.10484	0.849295	0.243575	0.551547	0.215185	0.780694	0.196068	0.896092	0.895095	0.997079	0.978718	-0.222581	0.576123	0.199177	2.86775	0.506402	1.6944	0.622973	0.697172	5.7355	1.46534	0.273218	4.8828	543.654	0.0693436	47.8021	4874.48	0.302434
2484231	0	7	58	5345328	1.14261	28	3.67716	89	35.6932	16.3979	39	-62	151	11.7852	41.1611	-0.773976	5345328	0.522181	420.237	10.8457	1.97113	0.122378	0.835214	0.264929	0.517337	0.261162	0.831687	0.194219	0.870047	0.869796	0.984482	0.947893	-0.205184	0.587298	0.257866	3.27154	0.34223	1.98447	0.520178	0.524765	6.54308	1.70966	0.275036	5.45136	155.41	0.0492584	36.8774	1647.48	0.288314
2493130	0	56	98	380648279	0.893263	20	24.6366	144	75.3216	16.2494	80	-377	521	8.58134	80.1662	-3.49607	380648279	0.71855	753.273	100.075	17.9506	-2.34052	0.829717	0.171105	0.653223	0.149227	0.627506	0.148145	0.928403	0.927468	0.998615	0.987696	-0.294096	0.607486	0.1353	9.99553	0.637004	1.38558	0.746442	0.793975	19.9911	1.21003	0.250206	3.95373	12766.3	0.215537	44.2858	42559.7	0.313426
2494948	0	22	80	72022610	1.11581	28	11.1792	115	55.0209	20.0765	62	-175	290	12.1021	62.1434	-2.29822	72022610	0.559818	834.501	32.849	10.3983	-2.34834	1.04518	0.180508	0.699038	0.169746	0.671952	0.150783	0.91687	0.916203	0.996416	0.97893	-0.352733	0.700646	0.160804	5.71247	0.493057	1.62432	0.730436	0.679713	11.4249	1.44377	0.306422	4.4403	2943.37	0.157821	50.1084	10440.6	0.392979
2500846	0	38	85	1555522577	0.858137	23	9.79009	276	63.5	14.5241	66	-325	601	9.95442	66.2962	-1.04252	1555522577	0.652122	362.94	77.7414	3.03367	-0.742909	0.633803	0.130939	0.657173	0.128216	0.551517	0.113644	0.936273	0.936155	0.999231	0.990854	-0.360389	0.666258	0.126458	8.80997	0.552544	1.38271	0.674186	0.725159	17.6199	1.24945	0.191186	3.89241	89129.7	0.251839	33.8722	230796	0.196238
2506002	0	27.4	69.8	281236	1.06227	23.5	3.67632	82	49.3981	13.4507	52	-12	94	9.15592	52.2537	-0.675535	1406180	0.495146	290.278	6.8046	1.00355	-0.296282	0.728344	0.29675	0.420646	0.29675	0.87307	0.207491	0.851625	0.851625	0.970325	0.925812	-0.135641	0.484152	0.29675	2.58777	0.309742	1.90897	0.421616	0.453523	5.17554	1.61222	0.256273	3.77491	13.7184	0.133189	4.51277	51	0.268263
2510973	0	29	80	327876628	0.996654	25	5.79834	126	56.8581	16.1804	61	-93	219	10.9304	60.6875	-1.16237	327876628	0.569687	450.127	13.9334	2.22883	-0.789266	0.752543	0.175125	0.620971	0.172058	0.664581	0.144372	0.914476	0.914278	0.99329	0.971396	-0.303448	0.650437	0.169437	3.71335	0.454833	1.60033	0.626731	0.637518	7.42671	1.41732	0.231917	4.49343	14200.1	0.159507	41.6029	50716.4	0.255343
2511135	0	33	68	40116164	1.01131	17	6.67272	93	51.5201	11.2478	53	-64	157	7.31542	53.7027	-1.21528	40116164	0.524454	229.664	13.3323	1.1641	-0.411357	0.701634	0.265813	0.448959	0.265478	0.820411	0.191574	0.867316	0.867294	0.98437	0.946915	-0.170186	0.5013	0.265186	3.63638	0.348244	1.79153	0.487602	0.511966	7.27276	1.5252	0.241862	5.30083	724.916	0.0521148	40.0493	7295.15	0.25342
2513143	0	59	94	577256947	0.495729	19	204.893	887	76.1205	11.6709	76	-285	1172	7.72446	78.4503	3.85969	577256947	0.855025	360.128	64.349	33.4558	1.48252	0.341284	0.119636	0.477977	0.0897358	0.436449	0.11137	0.957479	0.957112	0.999798	0.99645	-0.194356	0.38817	0.0815242	8.01833	0.796555	0.804228	0.651906	0.89131	16.0367	0.709178	0.11523	2.98878	32259.3	0.343934	33.8371	80197.1	0.133916
2523024	0	39	68	54594573	0.914448	14	9.36381	115	53.6095	9.62424	55	-76	191	5.94835	55.3504	-1.68414	54594573	0.588455	189.692	14.0386	1.06382	-0.479153	0.554714	0.254838	0.367661	0.253171	0.809999	0.187909	0.873683	0.873581	0.990213	0.957844	-0.12461	0.402569	0.251802	3.73679	0.430652	1.60553	0.502587	0.616969	7.47358	1.34719	0.202388	4.9721	987.089	0.0553922	44.0847	10486.3	0.222434
2523576	0	5	65	48091391	1.34991	28	5.43806	109	38.6169	19.0161	43	-87	196	11.955	46.4284	-1.33693	48091391	0.440983	664.333	11.3281	4.6463	-0.585135	1.17009	0.260977	0.633408	0.249334	0.831376	0.196809	0.877224	0.876497	0.990062	0.958718	-0.289478	0.710689	0.239619	3.33177	0.295344	2.16865	0.651493	0.43191	6.66355	1.88418	0.357766	5.50531	1659.23	0.0743716	48.2687	9838.33	0.405977
2523778	0	19	88	515729535	1.26561	24	51.287	137	51.1881	35.7329	69	-884	1021	11.256	96.7289	-6.29762	515729535	0.626814	6736.27	384.314	5668.18	-216.515	10.664	0.568167	0.899123	0.252605	0.870759	0.501617	0.902697	0.898044	0.998767	0.98907	-0.400803	0.791402	0.149578	19.5394	0.541866	2.00303	0.906628	0.730265	39.0789	1.70861	2.80804	4.46979	9745.27	0.176801	52.6536	34550	2.72619
3060760	0	59	113	591542049	1.124	25	9.27473	144	85.0155	16.4408	86	-242	386	10.8168	87.9523	-1.2274	591542049	0.550454	507.966	52.0789	3.87207	0.06996	0.9454	0.132411	0.75373	0.128297	0.558192	0.115519	0.936488	0.93626	0.99797	0.985789	-0.463249	0.793122	0.125142	7.20247	0.457839	1.66453	0.768433	0.639742	14.4049	1.52601	0.269453	4.31457	17589	0.230012	38.0689	42093.2	0.290421
3109693	0	20	116	242136197	1.74825	55	3.72124	158	69.884	31.3349	75	-110	268	22.2261	80.2003	-0.761354	242136197	0.338901	1548.31	25.0239	17.3689	-1.86045	2.34217	0.279284	0.786138	0.267299	0.857629	0.205334	0.86824	0.867548	0.994446	0.966751	-0.402935	0.858017	0.257819	4.95056	0.210426	2.71132	0.795079	0.361547	9.90112	2.41121	0.655363	6.05477	2182.17	0.0579669	43.0903	12757.9	0.71231
3797401	0	26	97	71286186	1.44004	30	41.4889	213	62.0428	26.968	70	-740	953	13.2239	78.5618	-4.5276	71286186	0.536357	2322.66	284.269	217.974	-14.8039	2.31132	0.458493	0.659442	0.275789	0.94135	0.380213	0.88132	0.87689	0.998894	0.987221	-0.294535	0.718209	0.198005	16.8465	0.448933	2.18433	0.755466	0.659632	33.693	1.8468	0.692454	5.08039	1112.08	0.0962844	60.8382	6194.92	0.969704
3799399	0	-143	92	10224395	2.51582	92	4.09008	118	7.01401	67.603	32	-287	405	41.9303	89.2005	-1.3397	10224395	0.229628	7907.53	49.1764	378.813	-37.7969	9.52019	1.23595	0.752579	0.712604	1.47143	0.632723	0.717184	0.695751	0.985641	0.933243	-0.391079	0.902211	0.382445	6.86244	0.113584	3.86315	0.802464	0.221678	13.7249	3.21535	2.68904	6.16278	71.8436	0.0559094	31.1358	295.072	3.1979
4295970	0	68	120	49838182	1.19608	25	9.86292	137	98.1667	17.7885	105	-87	224	10.7514	101.266	-2.11376	49838182	0.50236	618.076	21.835	5.93301	-1.56411	1.00824	0.235794	0.615696	0.222629	0.788178	0.184968	0.890824	0.890002	0.991043	0.963205	-0.268397	0.64866	0.211637	4.65203	0.405986	1.83575	0.628534	0.597957	9.30405	1.58943	0.31101	4.98866	370.06	0.0761441	50.8711	2441.47	0.383819
4515504	0	11	86	5268131	1.20321	34	5.67497	104	55.9992	24.9591	67	-76	180	15.5942	65.1805	-1.63077	5268131	0.542337	1112.58	13.9234	10.5882	-2.61419	1.14256	0.278228	0.59825	0.237572	0.836822	0.218198	0.887769	0.88528	0.989652	0.961357	-0.254042	0.613206	0.20409	3.70223	0.477792	1.76996	0.694198	0.674317	7.40447	1.50009	0.355198	4.69337	104.552	0.0843158	58.7734	672.498	0.470754
5095341	0	65	112	309818160	1.10575	24	3.78951	141	89.9747	14.7767	92	-20	161	10.3892	91.9049	-0.713467	309818160	0.513035	351.068	11.2484	1.72735	0.132067	0.85155	0.22266	0.585065	0.222211	0.757378	0.171402	0.888969	0.888939	0.98691	0.955573	-0.268092	0.652368	0.221818	3.33034	0.348391	1.87685	0.59234	0.511714	6.66067	1.65229	0.268553	5.25852	2614.16	0.0712694	37.8374	18818.1	0.275725
5176891	0	-9.6	79	2768315	1.48175	22	9.66549	98	43.4027	26.8363	53	-186	284	11.1501	61.3711	-2.48445	2768315	0.454127	1882.62	30.7994	45.0535	-7.87701	2.35636	0.41158	0.689677	0.348648	1.01812	0.282253	0.835522	0.831969	0.98918	0.951286	-0.325694	0.75206	0.299649	5.50562	0.331348	2.26191	0.780778	0.534961	11.0112	1.90709	0.691986	5.43532	32.4612	0.0441649	49.2956	333.784	0.868386
5426043	0	21	63	118659074	1.09195	22	11.2712	105	42.5525	13.6375	44	-228	333	9.09618	46.3976	-1.42913	118659074	0.51048	342.025	40.5519	1.98648	-0.0114075	0.767927	0.297607	0.440448	0.295818	0.864502	0.205583	0.852366	0.852269	0.995425	0.967151	-0.165667	0.514423	0.294471	6.3588	0.313232	1.95207	0.603349	0.46312	12.7176	1.65226	0.266383	5.43918	2819.52	0.0511524	36.323	28137.7	0.278389
5465254	0	47	110	19066862	1.39995	25	4.68647	124	87.4667	19.3316	96	-12	136	11.7084	91.1482	-1.49757	19066862	0.412274	657.583	11.479	5.71434	-1.09625	1.41546	0.258067	0.690913	0.257981	0.816867	0.189636	0.871024	0.871018	0.984821	0.948407	-0.346183	0.77638	0.257906	3.34504	0.255402	2.25484	0.805961	0.34384	6.69007	1.99645	0.418383	5.75869	111.773	0.0487028	36.6737	946.169	0.433826
5513783	0	30	70	232613550	1.19168	19	48.4134	111	48.8393	15.4527	53	-344	455	8.22654	56.7412	-5.36795	232613550	0.496075	834.284	73.8135	41.352	-4.6544	1.33315	0.281248	0.645488	0.251802	0.84659	0.215538	0.878177	0.876987	0.997244	0.97732	-0.265828	0.659538	0.233475	8.57615	0.343098	1.958	0.757085	0.5067	17.1523	1.69511	0.4036	5.22753	5502.93	0.0761651	44.0123	35841.4	0.49209
5609634	0	27	89	67687210	1.12206	30	24.4552	138	61.2223	20.4536	67	-372	510	13.0607	67.8801	-2.85104	67687210	0.577674	859.533	96.0301	17.48	-2.39508	0.96187	0.202979	0.645389	0.175408	0.693556	0.171665	0.915746	0.914833	0.998363	0.985544	-0.316254	0.678033	0.160568	9.78979	0.507871	1.6802	0.686605	0.696356	19.5796	1.48173	0.291212	4.57207	2045.11	0.139218	50.6503	8486.03	0.37499
6003896	0	16	100	219932684	1.55473	44	9.13107	136	64.3128	27.9476	73	-334	470	18.876	74.1831	-1.72435	219932684	0.440132	1367	78.32	23.171	-3.03921	1.78791	0.284306	0.722694	0.257919	0.8528	0.214692	0.874576	0.87353	0.997216	0.976738	-0.356048	0.794782	0.241936	8.82858	0.32244	2.41049	0.767007	0.536241	17.6572	2.11995	0.518054	5.5669	2845.89	0.0712095	45.8393	17589.9	0.604
6608430	0	39	81	12793858	0.92145	21	4.22507	131	61.0114	13.5162	62	-1	132	8.71181	63.6293	-0.0792386	12793858	0.617036	326.299	8.02787	1.36869	-0.387504	0.592286	0.156817	0.578766	0.156817	0.622647	0.131541	0.921592	0.921592	0.990776	0.968637	-0.292191	0.618409	0.156817	2.81406	0.518668	1.45551	0.636356	0.699985	5.62813	1.29869	0.187276	4.75891	289.009	0.0914587	40.6576	1949.83	0.207782
6863098	1	18	79	3196853324	1.16552	37	3.65994	172	47.5852	19.9955	48	-454	626	15.1327	53.4261	0.238803	3196853324	0.477178	589.999	132.189	2.43716	0.322175	1.043	0.147549	0.751986	0.145696	0.597816	0.12546	0.927427	0.927331	0.999252	0.990294	-0.447389	0.796965	0.144354	11.4876	0.366898	1.78399	0.758336	0.459737	22.9752	1.63157	0.297638	4.26785	276463	0.246843	37.0372	534437	0.303496
7072737	0	28	72	146554632	1.10066	18	10.813	123	51.3584	14.1225	54	-115	238	8.229	55.4498	-1.95849	146554632	0.522844	436.991	21.6166	4.12523	-1.08034	0.908753	0.228056	0.597453	0.225503	0.768972	0.175272	0.88766	0.887504	0.993848	0.96783	-0.266161	0.64478	0.223401	4.63103	0.369998	1.83556	0.714096	0.546366	9.26205	1.60386	0.284202	5.17457	3491.63	0.0732536	38.7076	24921.3	0.308863
7080972	0	38	90	313505545	0.947781	22	16.4148	142	67.2804	16.818	72	-268	410	9.75224	71.7134	-2.29726	313505545	0.666774	616.16	62.3287	9.5785	-1.48323	0.744328	0.130547	0.697701	0.117209	0.533407	0.116477	0.94331	0.942703	0.998426	0.988394	-0.398907	0.697331	0.108271	7.88512	0.619285	1.35976	0.712413	0.780236	15.7702	1.22884	0.218719	3.61575	18419.8	0.302163	38.0643	40646.6	0.261821
7093201	0	37	123	138155669	1.63297	42	20.2556	178	79.1944	27.4686	82	-421	599	17.7146	88.3732	-2.26231	138155669	0.396667	1538.06	124.309	48.1913	-3.59537	2.03634	0.31435	0.730201	0.273043	0.890398	0.238065	0.868623	0.867285	0.998172	0.980678	-0.355595	0.815047	0.251085	11.13	0.261042	2.58591	0.76822	0.447674	22.2601	2.27545	0.587673	5.85438	1015.73	0.0574182	44.0677	7017.04	0.688383
7372983	0	-3	63	787730	1.31224	31	5.4354	93	31.8549	20.437	35	-123	216	13.7846	41.6086	-0.846228	787730	0.481831	716.537	17.6194	3.34639	-0.159566	0.97724	0.366356	0.453278	0.346448	0.953912	0.238775	0.829849	0.828767	0.986101	0.942715	-0.16436	0.540701	0.331346	4.17924	0.291595	2.27323	0.48017	0.480462	8.35849	1.89865	0.335899	5.55185	20.7802	0.0456708	38.5204	219.233	0.376447
7387837	0	82	632	4860764892	3.97269	301	3.34461	1194	300.978	179.007	239	-123	1317	126.993	373.546	0.930706	4860764892	0.0806779	48948.8	112.181	16948.8	554.711	72.9941	5.23253	0.866147	1.53565	2.35272	2.76911	0.555575	0.505876	0.993131	0.949213	-0.283708	0.936645	0.403863	9.75892	0.0194271	6.79205	0.875387	0.0771339	19.5178	4.89857	19.5567	7.71921	2457.66	0.0705514	27.5231	2810.42	19.6499
7401559	0	27	62	112397089	1.06327	17	75.1091	112	45.4916	11.3899	47	-414	526	7.2725	48.4786	-4.10605	112397089	0.501191	280.686	108.762	5.52294	-0.313229	0.796539	0.288758	0.466444	0.277564	0.850698	0.208322	0.862363	0.862156	0.99802	0.978702	-0.176546	0.531344	0.273319	10.4228	0.308614	1.90524	0.537401	0.426095	20.8456	1.62286	0.271324	5.42025	2554.96	0.0534232	36.5343	23969.5	0.283562
7417686	0	39	98	253716557	1.22446	27	52.9124	183	67.8449	22.8272	75	-707	890	12.0022	80.4972	-5.65791	253716557	0.595912	1876.87	286.073	167.349	-12.5561	1.81969	0.366822	0.655364	0.254485	0.875601	0.300184	0.884459	0.882104	0.99901	0.987516	-0.249977	0.642329	0.209461	16.9029	0.472696	1.96701	0.758305	0.67614	33.8059	1.67807	0.546627	4.95389	3406.2	0.0869926	51.8439	23333	0.788263
7485782	0	48	82	81524718	0.705926	17	163.295	211	64.5304	13.2581	67	-702	913	7.40086	70.7214	-9.48042	81524718	0.773952	837.34	285.827	68.3727	-4.62488	0.671466	0.238152	0.460559	0.138431	0.585565	0.218448	0.939122	0.937874	0.999433	0.993592	-0.202523	0.449045	0.109549	16.9032	0.713615	1.06885	0.616876	0.841172	33.8064	0.917333	0.227405	3.63801	3989.38	0.244747	47.7979	12615.4	0.366406
7650443	0	74	120	265930744	1.16009	17	13.5538	161	99.6518	16.2695	106	-101	262	8.05671	102.952	-2.78213	265930744	0.540327	668.589	32.4541	9.88325	-2.29493	1.09144	0.228807	0.648525	0.211614	0.771248	0.18281	0.896875	0.895909	0.995471	0.973781	-0.284066	0.658496	0.198282	5.67786	0.442991	1.78372	0.674849	0.638009	11.3557	1.54436	0.330062	4.73821	2749.37	0.10958	47.8788	13556.8	0.412956
7661963	0	45	81	179757020	0.870504	16	116.959	185	58.9637	18.5538	66	-907	1092	6.89812	78.427	-9.24693	179757020	0.737563	2674.08	434.924	858.77	-37.3	2.38386	0.424989	0.679374	0.164777	0.636569	0.397145	0.936885	0.934443	0.999253	0.993498	-0.299401	0.590158	0.101395	20.8431	0.694577	1.25116	0.734154	0.830327	41.6862	1.06901	0.702212	3.52606	8636.44	0.295515	49.6223	21555.3	1.12354
7666848	0	11	175	24375518	2.63072	60	11.7563	759	88.695	67.979	69	-314	1073	26.1815	148.524	2.32932	24375518	0.258923	14192.5	94.6073	4339.52	217.018	20.5858	4.08382	0.67297	1.09609	1.99745	2.79014	0.680392	0.653338	0.992841	0.958568	-0.259537	0.843577	0.356534	9.51171	0.117575	4.53629	0.741587	0.284238	19.0234	3.4544	6.16739	6.35914	54.0136	0.0488811	36.6572	286.11	5.82278
7853023	0	26	66	9764179	1.02062	19	3.45766	89	48.2538	12.1926	51	-10	99	8.32266	50.7238	-0.728495	9764179	0.499528	244.481	6.71765	0.843049	-0.188834	0.766176	0.227355	0.541834	0.227355	0.764952	0.17372	0.886323	0.886323	0.977265	0.943161	-0.231926	0.596267	0.227355	2.56569	0.335354	1.76829	0.542576	0.454815	5.13137	1.54093	0.248383	5.2781	207.861	0.0547724	35.2416	1895.71	0.254438
7869295	0	16	81	544696605	1.15234	40	3.95736	141	51.3945	21.6153	58	-109	250	16.0967	57.7711	-0.826738	544696605	0.498671	696.108	21.4241	3.39368	-0.898103	1.04681	0.117626	0.797326	0.1159	0.518923	0.103797	0.942337	0.942222	0.996828	0.983474	-0.511184	0.820425	0.114398	4.60345	0.421624	1.64492	0.808909	0.567631	9.2069	1.52286	0.29111	4.16927	43717.1	0.267866	37.0868	81385.6	0.315519
7876164	0	46	95	867444460	0.96565	24	34.6584	150	69.593	16.697	72	-680	830	10.3073	74.2096	-3.26786	867444460	0.678359	663.88	253.908	16.7082	-1.85546	0.80385	0.177522	0.634453	0.158399	0.64877	0.151602	0.923411	0.922606	0.999456	0.991711	-0.298259	0.635679	0.146377	15.9296	0.582236	1.53424	0.794054	0.756957	31.8591	1.34882	0.245343	4.12173	32558.1	0.206698	41.9154	106852	0.297545
7878136	0	21	89	128846961	1.34083	39	3.86938	128	55.5682	22.451	57	-91	219	16.0359	62.3065	-0.62984	128846961	0.456418	794.282	13.3425	4.63352	-0.603379	1.21782	0.216759	0.696913	0.211383	0.751901	0.170595	0.895184	0.894846	0.991709	0.964896	-0.357382	0.770189	0.206875	3.61831	0.323888	2.12654	0.720021	0.477275	7.23663	1.89593	0.358646	5.35138	2788.71	0.0840226	43.0184	15148.5	0.387176
7883469	0	31	66	4091238	0.975453	19	2.81869	84	50.5472	10.864	53	6	78	7.83703	52.3127	-0.544804	4091238	0.516918	181.599	2.80716	0.788206	-0.315753	0.683716	0.234965	0.486724	0.234965	0.77617	0.177234	0.882518	0.882518	0.953007	0.921678	-0.195426	0.534118	0.234965	1.64155	0.363426	1.69619	0.486724	0.524065	3.28309	1.46123	0.22967	5.20351	77.4508	0.0518066	40.6126	772.793	0.241541
7883647	0	30	78	15924929	0.989155	26	3.33991	100	55.3281	15.2872	58	-30	130	10.8123	58.5526	-0.61294	15924929	0.540981	367.204	7.38492	1.09854	-0.49859	0.66659	0.213368	0.512755	0.212122	0.743418	0.166954	0.894146	0.894063	0.987471	0.957617	-0.212864	0.554662	0.211033	2.69655	0.415265	1.6368	0.515327	0.596816	5.3931	1.41917	0.219989	4.88869	368.861	0.0794103	46.6236	2512.86	0.24472
7885168	0	60	125	83593338	1.35459	33	6.51055	156	94.7074	21.3688	100	-79	235	13.9172	98.9946	-1.42327	83593338	0.438934	830.433	20.3705	7.32183	-1.47332	1.25036	0.290457	0.620276	0.276412	0.87612	0.211582	0.864051	0.863198	0.992213	0.960759	-0.25861	0.680633	0.264912	4.48667	0.290038	2.2051	0.670385	0.429232	8.97334	1.90155	0.385204	5.53275	443.024	0.0519372	43.4885	3744.11	0.442387
7892135	0	24	86	54869933	1.1142	34	3.35962	119	56.8582	19.6369	60	-61	180	14.2572	61.8575	-0.611119	54869933	0.518794	593.497	13.7318	2.1177	-0.638029	0.845511	0.19624	0.621666	0.194799	0.711402	0.157258	0.902839	0.902744	0.992464	0.967568	-0.295721	0.672764	0.193554	3.68365	0.399354	1.79106	0.634906	0.5802	7.36729	1.5903	0.260438	4.97935	1286.19	0.0896922	42.8077	7439.51	0.286523
7893717	1	9	78	244878349	1.46827	34	30.5547	162	43.7852	24.1002	50	-637	799	14.531	57.0228	-3.30401	244878349	0.425261	1334.46	208.987	61.1698	-5.4023	1.78547	0.294635	0.713533	0.251439	0.855683	0.229483	0.879642	0.878216	0.998993	0.986149	-0.337685	0.772475	0.228335	14.4435	0.290233	2.31009	0.788869	0.411583	28.8869	2.01571	0.520027	5.52873	6098.27	0.0809756	46.9526	32026.4	0.628248
7907825	0	17	59	43696190	1.20695	19	10.4548	100	39.6616	14.4391	44	-103	203	8.32617	44.9983	-2.17398	43696190	0.493599	451.802	18.5979	3.7304	-0.395797	0.894068	0.323602	0.46639	0.320029	0.903653	0.217269	0.840575	0.840343	0.991269	0.954345	-0.17512	0.554346	0.316959	4.29595	0.301987	2.10053	0.650434	0.467976	8.59191	1.77087	0.304418	5.53205	1073.75	0.0497565	39.9919	10651.9	0.332648
7920366	0	24	68	493633225	1.20269	21	28.5852	105	46.7499	15.0468	51	-327	432	9.13396	52.2282	-3.4477	493633225	0.473527	542.228	72.6456	12.5236	-1.73796	1.05915	0.293405	0.563799	0.28753	0.868543	0.206932	0.857175	0.856822	0.997099	0.973905	-0.220082	0.61079	0.282757	8.512	0.294056	2.05047	0.775892	0.411421	17.024	1.75484	0.338138	5.50116	9768.33	0.0539791	38.2429	85691.9	0.378254
7921237	0	44	76.6	39478154	0.655331	16	3.88042	105	61.1843	10.0502	62	3	102	6.90998	62.5353	-0.685378	39478154	0.720376	167.14	3.53143	0.737675	-0.433588	0.357862	0.115455	0.507715	0.115455	0.512606	0.101675	0.942273	0.942273	0.988455	0.971136	-0.242464	0.483239	0.115455	1.863	0.661742	1.01291	0.525306	0.805102	3.726	0.897458	0.118329	3.73389	2248.11	0.222695	43.6831	7272.2	0.139912
7921287	0	30	287.6	279248952	2.86513	108	5.35843	594	129.59	80.3222	98	-117	711	47.9463	169.02	1.49844	279248952	0.186458	11774.2	43.8982	1702.14	114.383	18.5495	1.07133	0.891077	0.656187	1.48718	0.616222	0.728992	0.712367	0.995347	0.96045	-0.377765	0.933891	0.399874	6.28699	0.0829108	4.65316	0.899076	0.218374	12.574	3.7591	4.90522	7.0657	454.208	0.0464663	41.2756	1822.63	4.80713
7924550	0	42	76	380499928	0.804623	17	15.6921	131	58.7512	11.3921	61	-262	393	7.16542	61.0112	-2.03035	380499928	0.67242	270.657	61.0948	1.78197	-0.664884	0.500579	0.181609	0.464634	0.178365	0.677744	0.148604	0.9113	0.911135	0.997789	0.982192	-0.185784	0.473466	0.176028	7.81121	0.555829	1.35011	0.569891	0.729706	15.6224	1.16491	0.170547	4.25011	13926.3	0.136239	42.3815	68734.8	0.195089
7933133	0	43	83	23596712	0.834523	19	22.8853	119	62.1412	14.0831	64	-205	324	8.08254	66.043	-3.02027	23596712	0.705255	500.153	47.0684	5.39649	-1.24468	0.565294	0.169642	0.529157	0.153147	0.635055	0.145739	0.925802	0.925052	0.997424	0.983157	-0.222241	0.512212	0.142071	6.85342	0.631404	1.27265	0.578167	0.787566	13.7068	1.10507	0.183734	4.38405	640.433	0.118379	49.9158	3815.43	0.250467
7935032	0	38	85	8868286	0.824564	23	5.81867	107	64.4392	15.2241	69	-38	145	9.6773	67.6113	-1.36989	8868286	0.681789	418.874	8.27141	1.68721	-0.646309	0.478271	0.138501	0.541977	0.13518	0.574287	0.119588	0.932963	0.932742	0.991911	0.973075	-0.25606	0.537687	0.132274	2.86116	0.630703	1.22971	0.563333	0.786392	5.72232	1.08714	0.154193	4.35496	231.848	0.11951	49.3032	1322.67	0.196687
7936723	0	8	77	21682265	1.27522	37	3.39429	106	47.1194	21.6198	53	-63	169	15.3409	54.2767	-0.818639	21682265	0.455689	725.719	12.8774	3.76125	-1.03627	1.10147	0.246096	0.632002	0.242184	0.805988	0.186128	0.87956	0.879299	0.990566	0.959729	-0.278225	0.686837	0.238761	3.55851	0.329222	2.03944	0.634984	0.500463	7.11703	1.78328	0.336891	5.29118	458.955	0.0623581	46.4927	3353.87	0.381395
7936772	0	30	74	26311398	0.952536	19	5.02508	105	55.0187	13.8333	59	-47	152	8.74608	58.0797	-1.25509	26311398	0.586089	346.197	7.63739	1.76903	-0.751511	0.671432	0.176526	0.581022	0.175842	0.668564	0.14471	0.912193	0.912147	0.989628	0.964854	-0.266573	0.601125	0.175244	2.74108	0.484385	1.51313	0.582693	0.66851	5.48217	1.33454	0.211989	4.78307	714.816	0.0916431	45.1517	4571.49	0.241941
7948066	0	11	75	432978621	1.23306	38	15.1972	121	46.186	21.5609	53	-523	644	15.3643	53.7811	-1.67837	432978621	0.472526	759.261	157.786	12.1076	-1.58582	1.18008	0.155645	0.765628	0.151422	0.617163	0.132054	0.92487	0.924688	0.999211	0.989922	-0.447183	0.801618	0.148723	12.5511	0.378298	1.81427	0.811417	0.521013	25.1022	1.65749	0.333932	4.54721	29684.1	0.198297	39.4349	70734.7	0.376666
7954503	0	23	90	53702437	0.968264	29	6.188	114	65.1506	21.1163	75	-102	216	13.0551	70.9605	-1.67839	53702437	0.642378	790.791	23.2854	6.29685	-1.72483	0.805156	0.143898	0.693254	0.135021	0.582979	0.125262	0.933957	0.933377	0.996148	0.980869	-0.353884	0.664998	0.12737	4.80832	0.603592	1.38698	0.726558	0.768822	9.61663	1.23143	0.237264	4.06096	2127.66	0.1995	48.7914	6850.96	0.295297
7958872	0	12	92	480967019	1.42759	51	55.9481	145	48.8181	27.4454	47	-927	1072	21.0132	60.6798	-3.2715	480967019	0.429023	1298.84	420.578	98.8604	-4.18514	1.66412	0.210215	0.774336	0.178946	0.690442	0.177071	0.913362	0.912789	0.999573	0.992269	-0.464712	0.847544	0.168069	20.4991	0.327223	2.12922	0.84366	0.429957	40.9982	1.92989	0.468584	4.96679	20077.3	0.153702	42.1628	56041.1	0.533594
7981809	0	13	75	13106779	1.43512	33	21.8222	120	44.8142	24.6354	54	-256	376	13.7218	60.4649	-3.58059	13106779	0.449354	1647.69	57.413	85.9759	-9.79742	2.21223	0.324144	0.734629	0.261808	0.887416	0.252258	0.877877	0.875308	0.996131	0.974356	-0.347631	0.768216	0.222302	7.54586	0.338399	2.20025	0.786769	0.520931	15.0917	1.94247	0.634094	5.37716	224.609	0.0626526	49.7911	1610.93	0.771337
[truncated: 803 more columns]
