# Supplementary material for: Application of CT Radiomics Combined with Machine Learning Methods in Predicting the Recurrence or Metastasis of Gastrointestinal Stromal Tumors
Source: Research Square preprint supplement (doi:10.21203/rs.3.rs-1124517/v1), 2021-12-13
Supplement: Supplementary file 4 [file f2fc2e7c86f35ce0a760d4b3.xlsx]

## Sheet: A
ID	label	diameter	ap_original_firstorder_10Percentile	ap_original_firstorder_90Percentile	ap_original_firstorder_Energy	ap_original_firstorder_Entropy	ap_original_firstorder_InterquartileRange	ap_original_firstorder_Kurtosis	ap_original_firstorder_Maximum	ap_original_firstorder_Mean	ap_original_firstorder_MeanAbsoluteDeviation	ap_original_firstorder_Median	ap_original_firstorder_Minimum	ap_original_firstorder_Range	ap_original_firstorder_RobustMeanAbsoluteDeviation	ap_original_firstorder_RootMeanSquared	ap_original_firstorder_Skewness	ap_original_firstorder_TotalEnergy	ap_original_firstorder_Uniformity	ap_original_firstorder_Variance	ap_original_glcm_Autocorrelation	ap_original_glcm_ClusterProminence	ap_original_glcm_ClusterShade	ap_original_glcm_ClusterTendency	ap_original_glcm_Contrast	ap_original_glcm_Correlation	ap_original_glcm_DifferenceAverage	ap_original_glcm_DifferenceEntropy	ap_original_glcm_DifferenceVariance	ap_original_glcm_Id	ap_original_glcm_Idm	ap_original_glcm_Idmn	ap_original_glcm_Idn	ap_original_glcm_Imc1	ap_original_glcm_Imc2	ap_original_glcm_InverseVariance	ap_original_glcm_JointAverage	ap_original_glcm_JointEnergy	ap_original_glcm_JointEntropy	ap_original_glcm_MCC	ap_original_glcm_MaximumProbability	ap_original_glcm_SumAverage	ap_original_glcm_SumEntropy	ap_original_glcm_SumSquares	ap_original_gldm_DependenceEntropy	ap_original_gldm_DependenceNonUniformity	ap_original_gldm_DependenceNonUniformityNormalized	ap_original_gldm_DependenceVariance	ap_original_gldm_GrayLevelNonUniformity
16284	0	1.2	-8.2	61	712245	1.5084	39.75	9.19782	78	25.127	25.2586	29.5	-173	251	16.1519	43.8747	-1.98812	712245	0.443711	1293.62	26.4355	17.0005	-2.35663	1.60965	0.423223	0.583473	0.347608	1.01854	0.293538	0.837928	0.833758	0.988934	0.951651	-0.265284	0.704987	0.289669	5.11236	0.286864	2.43771	0.642126	0.483252	10.2247	2.06939	0.508217	5.64458	15.7297	0.0425128	45.843	164.173
200038	0	3.3	3	46	21524002	0.788398	21	6.95626	100	25.2262	14.3865	27	-111	211	8.96758	32.2538	-1.21893	21524002	0.73639	403.948	16.0573	1.88221	-0.282186	0.41173	0.143886	0.476513	0.140506	0.590005	0.123549	0.930309	0.930085	0.996125	0.979988	-0.220278	0.499394	0.137559	3.99878	0.660287	1.22838	0.608876	0.80858	7.99757	1.07552	0.138904	4.06284	3432.69	0.165911	47.1653	15235.9
444669	0	1.3	-89	97	2479001	2.40711	79.5	4.27893	122	20.4897	58.7181	43.5	-234	356	37.1994	79.7271	-1.33047	2479001	0.239776	5936.58	37.4868	189.093	-20.5784	6.87388	1.28322	0.666809	0.743873	1.47742	0.647977	0.701622	0.68091	0.981506	0.922922	-0.349039	0.868343	0.418547	6.0066	0.111578	3.7768	0.760801	0.236514	12.0132	3.05898	2.03927	5.78026	23.2205	0.0595398	26.6778	93.5128
559107	0	1.4	48	109	10943459	1.23888	27	4.66316	145	80.4345	18.8403	82	-30	175	11.9272	84.4351	-0.804602	10943459	0.524426	659.576	9.79436	3.4903	-0.185659	0.883163	0.250326	0.553581	0.241006	0.803989	0.189261	0.880876	0.880429	0.985484	0.95209	-0.249778	0.634344	0.234497	3.10419	0.401422	1.96623	0.606181	0.608289	6.20839	1.70928	0.283372	5.33776	90.3199	0.0588403	48.5582	804.993
661975	0	1.9	15	49	4039888	0.600692	18	4.54264	71	32.8577	10.9517	34	-49	120	7.549	35.7837	-0.707022	4039888	0.788077	200.844	4.42549	0.51447	0.195788	0.273771	0.172168	0.227881	0.172168	0.655006	0.141249	0.913916	0.913916	0.982783	0.956958	-0.0867553	0.269668	0.172168	2.09763	0.64316	1.1236	0.332104	0.792862	4.19526	0.951432	0.111485	4.45146	217.384	0.0689015	40.6584	2486.38
670057	0	1.54	28	67	4123880	1.0644	20	4.37908	86	49.0606	12.3029	52	-19	105	8.3479	51.5807	-0.91939	4123880	0.499032	253.621	6.77634	1.20281	-0.335772	0.797253	0.250405	0.521428	0.246575	0.808136	0.187291	0.877351	0.877096	0.975136	0.938548	-0.213929	0.583674	0.243223	2.57674	0.329786	1.85833	0.537815	0.469266	5.15347	1.59867	0.261914	5.37011	83.3587	0.0537798	36.6435	773.499
681473	0	3.84	51	119	119773567	1.33375	36	4.3372	157	83.9721	21.9739	86	-82	239	15.0591	88.6083	-0.597443	119773567	0.466024	800.11	18.0852	4.72729	-0.28732	1.14442	0.241148	0.650096	0.235714	0.79521	0.183702	0.883012	0.882686	0.993507	0.966422	-0.305569	0.723482	0.231309	4.22602	0.327843	2.13788	0.656773	0.512046	8.45204	1.88772	0.346392	5.48686	962.798	0.0631136	44.5696	7109.19
714524	0	4.06	-17	40	42685025	0.971896	22	22.5836	75	14.3034	20.7257	22	-337	412	10.0277	37.8373	-3.64322	42685025	0.696618	1227.08	61.7376	44.9793	-6.0455	1.28829	0.181674	0.742554	0.153359	0.642168	0.157474	0.927633	0.926143	0.997817	0.984914	-0.348749	0.663331	0.132354	7.83968	0.644228	1.40734	0.802498	0.799241	15.6794	1.23928	0.36749	3.90519	6199.94	0.207947	48.8892	20769.7
722570	0	4.85	24	61	68493657	1.16404	18	140.497	87	43.0194	13.8225	47	-537	624	7.61438	52.0777	-9.58851	68493657	0.485734	861.414	154.376	104.54	-6.73776	1.29826	0.385125	0.527346	0.308196	0.907719	0.284785	0.852241	0.851493	0.997821	0.978284	-0.188182	0.555918	0.287611	12.4156	0.292402	2.02183	0.668481	0.393024	24.8312	1.71957	0.420847	5.51657	1287.96	0.0509981	37.0185	12267.2
738109	1	7.3	9	55	140862604	0.773734	28	2.48004	105	31.5532	14.9358	31	-62	167	11.245	36.2917	0.178785	140862604	0.689065	321.484	10.0286	1.01072	0.424392	0.476994	0.15887	0.50004	0.158689	0.624527	0.132559	0.920685	0.920674	0.993891	0.973556	-0.223952	0.520372	0.158537	3.15421	0.565348	1.34673	0.51685	0.738128	6.30842	1.18702	0.158966	4.18201	17428.1	0.162955	39.8163	73695.5
741958	0	5.1	21	71	138756009	1.14009	26	34.3173	115	45.9188	16.1647	46	-438	553	10.9113	51.0561	-2.35693	138756009	0.486398	498.187	108.877	7.402	-0.494018	0.921067	0.253379	0.567399	0.245939	0.805895	0.190317	0.877955	0.877717	0.998258	0.981119	-0.245883	0.633788	0.242007	10.4264	0.315832	1.95255	0.718563	0.432076	20.8528	1.69866	0.293612	5.35787	3487.04	0.0655089	39.0235	25890.9
797493	1	5.24	19	59	137894496	0.773452	19	5.73843	126	36.376	12.583	34	-148	274	8.54078	39.9327	0.29494	137894496	0.676069	271.401	17.569	1.15282	0.512534	0.506111	0.127773	0.595727	0.125704	0.546525	0.111454	0.937463	0.937353	0.996557	0.982078	-0.310079	0.596459	0.124167	4.18024	0.587169	1.23354	0.603355	0.751376	8.36048	1.10208	0.158471	3.70103	23232.4	0.268661	38.2645	58463
818188	0	0.9	-3	44	85309	0.912598	25	5.39593	55	21.6154	16.7202	27	-66	121	11.3981	30.618	-1.26453	426545	0.679024	470.237	8.86335	1.50663	-0.278441	0.450985	0.239957	0.299656	0.2332	0.794847	0.184885	0.884526	0.884076	0.986004	0.953585	-0.118326	0.404918	0.227288	2.96823	0.553835	1.51317	0.37139	0.735326	5.93647	1.28335	0.172736	3.19321	12.8242	0.140925	5.81524	61.7912
830901	0	3.4	27	62	62171497	1.03653	18	6.47082	99	44.6987	11.3801	46	-81	180	7.65265	47.1929	-0.867514	62171497	0.515071	229.202	11.5744	0.973147	0.104623	0.66517	0.342335	0.320135	0.341349	0.90843	0.219794	0.82949	0.829424	0.97988	0.931763	-0.103414	0.383748	0.340486	3.39023	0.296369	1.93776	0.444719	0.426576	6.78046	1.59273	0.251876	5.40002	1420.66	0.0508924	30.5257	14378.2
852973	0	7.46	9	56	159782423	1.00376	24	9.28353	128	32.3805	15.6797	34	-137	265	10.192	39.0467	-1.48101	159782423	0.620126	476.143	17.2427	3.45358	-0.356974	0.620335	0.307187	0.334903	0.298085	0.888431	0.213884	0.852447	0.851867	0.991737	0.957578	-0.122822	0.41657	0.290377	4.143	0.433639	1.79897	0.633389	0.628217	8.286	1.47318	0.23188	4.94847	5421.25	0.0517295	44.7323	64989.2
883467	1	3.6	50	126	218266074	1.47771	43	4.88646	178	86.1743	25.0212	86	-108	286	17.4592	91.9779	-0.641593	218266074	0.425372	1033.92	28.0732	8.23294	-0.575399	1.42964	0.294335	0.65692	0.276134	0.881213	0.215544	0.864745	0.863745	0.994165	0.965728	-0.294145	0.741346	0.262246	5.27156	0.278084	2.41518	0.676646	0.444813	10.5431	2.0954	0.430994	5.71054	1367.45	0.053002	45.1644	10974.6
889019	0	1.6	-34	46	3211948	1.38321	37	5.32981	68	12.3459	25.7727	22	-131	199	16.3079	36.5449	-1.47824	3211948	0.512033	1183.11	14.8126	13.5082	-2.61173	1.40633	0.305284	0.636919	0.276288	0.894747	0.225367	0.86656	0.864756	0.988506	0.954633	-0.262129	0.675727	0.252131	3.8127	0.406485	2.17734	0.684914	0.622582	7.62539	1.86594	0.427904	5.25516	124.216	0.051649	51.2013	1231.44
895576	0	11.08	22	56	1014190502	0.854157	18	6.30795	237	40.3931	10.9454	41	-66	303	7.53088	42.8912	0.246808	1014190502	0.626364	208.05	10.5745	1.0797	0.473129	0.556171	0.208918	0.453491	0.208471	0.730861	0.163606	0.895837	0.895809	0.995823	0.973947	-0.182148	0.492022	0.208097	3.23846	0.468855	1.52198	0.540515	0.654285	6.47693	1.31153	0.191272	4.55007	65124.8	0.118131	39.8169	345311
953353	0	1.5	42	81	607742	0.832926	16.75	5.47159	130	62.7746	12.8814	64	0	130	7.65429	65.4207	-0.132527	3038710	0.673874	339.217	3.6888	0.778308	-0.166039	0.366428	0.215609	0.257071	0.21151	0.748048	0.169446	0.894928	0.894655	0.978628	0.947327	-0.088153	0.305371	0.207924	1.91077	0.5683	1.3992	0.281536	0.742768	3.82154	1.1735	0.145509	2.99126	27.4366	0.193216	6.13489	95.6901
957853	0	2.1	23	58	3936369	1.04747	16	6.5755	95	42.1304	11.2586	44	-38	133	6.70745	45.045	-1.31673	3936369	0.537126	254.085	5.39785	1.09087	0.182111	0.645392	0.322854	0.332268	0.320291	0.899292	0.216144	0.840282	0.840111	0.967833	0.920055	-0.109942	0.409619	0.318048	2.3059	0.333842	1.90452	0.445499	0.505451	4.6118	1.57376	0.242062	5.38239	91.7577	0.0472978	35.3088	1042.02
957896	0	1.6	-5.6	152	17974989	2.30099	85	4.33641	182	85.2837	51.2818	102	-223	405	35.8174	107.171	-1.16167	17974989	0.246388	4212.31	56.4632	95.8375	-11.2145	4.96679	0.852262	0.706036	0.59616	1.33552	0.479867	0.735466	0.725807	0.990076	0.942513	-0.257062	0.799429	0.446402	7.44516	0.11701	3.74835	0.735863	0.267892	14.8903	2.99233	1.45476	6.1293	81.0741	0.0518045	31.165	385.597
982283	0	1.92	34	84	15434379	1.00221	24	3.66984	127	59.7579	15.196	61	-18	145	10.1883	62.9493	-0.345801	15434379	0.579193	391.607	7.76188	1.29574	-0.441877	0.612441	0.238161	0.436787	0.235931	0.789485	0.180993	0.882406	0.882258	0.98603	0.952888	-0.158902	0.48591	0.233979	2.76916	0.436284	1.70202	0.446101	0.628996	5.53831	1.45602	0.212651	5.13022	201.284	0.0516775	46.0239	2255.96
983675	0	9.5	15	65	822017813	1.19927	24	31.7077	194	39.3066	17.3496	42	-494	688	10.3378	48.3959	-3.54604	822017813	0.515566	797.156	127.553	21.9416	-2.00119	1.12471	0.283749	0.592272	0.26334	0.857284	0.211896	0.871242	0.870328	0.998565	0.982526	-0.239625	0.633289	0.249807	11.2846	0.351773	2.00487	0.731985	0.53273	22.5693	1.72749	0.352115	5.20839	27023.2	0.076997	42.7586	180946
990256	0	2.5	19	66	25444375	1.26872	20	11.6123	101	43.5268	15.9949	48	-110	211	9.26551	49.7871	-2.32186	25444375	0.456719	584.165	19.8332	6.62888	-1.21995	1.04972	0.371732	0.473954	0.364962	0.947359	0.231714	0.818643	0.818196	0.989981	0.947983	-0.167942	0.547894	0.35908	4.43436	0.255006	2.22244	0.69689	0.317456	8.86873	1.84241	0.355364	5.59999	519.761	0.0506343	29.8088	4688.22
997832	0	11	28	73	756910433	1.06909	23	5.9848	167	50.7235	13.9849	51	-307	474	9.637	53.8329	-0.229457	756910433	0.494187	325.115	73.1405	1.30819	-0.123378	0.827911	0.221624	0.577371	0.220709	0.752951	0.170551	0.889781	0.889733	0.998184	0.981613	-0.263084	0.636735	0.220045	8.54335	0.330107	1.8297	0.681817	0.428875	17.0867	1.6057	0.262384	5.08215	24603	0.0941975	39.0997	129074
1004428	0	3.2	54	127	144408160	1.52164	36	4.86705	213	90.0321	23.7862	92	-81	294	15.2669	95.587	-0.473587	144408160	0.41815	1031.08	19.3757	9.01397	-0.0194686	1.54498	0.269327	0.70166	0.256701	0.843853	0.201206	0.873662	0.87291	0.994646	0.968085	-0.339002	0.783785	0.246506	4.36539	0.277805	2.41681	0.715914	0.434657	8.73077	2.12862	0.453577	5.72226	914.098	0.057836	42.5472	6608.85
1006004	0	1.44	15	58	1907146	0.759079	20	3.54659	78	35.6355	12.6085	35	-38	116	8.72335	39.2176	0.0328653	1907146	0.687291	268.133	4.77101	0.948872	0.495914	0.465385	0.124068	0.571991	0.122662	0.533582	0.108056	0.938903	0.93881	0.987658	0.969405	-0.302606	0.571001	0.121432	2.1646	0.605273	1.18395	0.595441	0.764728	4.3292	1.05475	0.147363	4.43951	126.103	0.101696	38.3991	852.24
1011746	1	6.99	28	74	291292460	1.14134	25	237.263	163	49.9864	15.2504	50	-943	1106	10.3268	56.199	-9.67002	291292460	0.484059	659.684	421.343	76.9349	-3.63304	1.09604	0.263712	0.608351	0.21201	0.75045	0.216741	0.89757	0.897145	0.999515	0.991237	-0.308117	0.692088	0.200482	20.5216	0.334548	1.87605	0.723206	0.422883	41.0432	1.65315	0.339938	5.04627	10681.6	0.115815	43.7986	44644.8
1021989	0	2.14	-38	48	8200575	1.46366	33	10.4844	83	15.0137	29.2479	28	-274	357	15.6153	45.222	-2.36481	8200575	0.516031	1819.62	47.1176	36.0038	-5.4169	1.89267	0.347708	0.677768	0.285044	0.939965	0.263101	0.867007	0.863718	0.994763	0.969002	-0.294055	0.720166	0.238671	6.83596	0.415407	2.24587	0.715144	0.632827	13.6719	1.9208	0.560095	5.2835	244.154	0.0608863	59.2845	2069.28
1064168	0	5.19	26	70	115164797	1.05822	22	3.71766	158	48.0484	13.5366	48	-56	214	9.49034	51.0849	0.104444	115164797	0.495515	301.02	12.1369	0.984059	0.108753	0.774458	0.261963	0.494078	0.261369	0.819479	0.190822	0.869414	0.869375	0.992922	0.962672	-0.193347	0.555709	0.260854	3.46536	0.309633	1.88252	0.494585	0.405481	6.93072	1.61812	0.259105	5.37658	2598.2	0.0588761	39.6801	21867.1
1070735	0	2.91	17	58	11620583	0.975456	20	5.54653	91	38.9611	12.979	41	-77	168	8.80204	42.4952	-0.895826	11620583	0.579983	287.869	10.7326	1.0507	0.140957	0.548544	0.35136	0.218589	0.349827	0.919424	0.223177	0.825342	0.82524	0.979359	0.930086	-0.0739272	0.299171	0.348486	3.26853	0.356257	1.83949	0.462671	0.531185	6.53705	1.48327	0.224976	5.16107	306.097	0.0475675	33.6527	3732.19
1073455	0	11.32	12	54	714183229	0.775892	23	44.1413	478	32.5894	13.8364	32	-409	887	9.63658	37.7366	1.90905	714183229	0.704498	361.983	103.084	12.0033	1.18748	0.541727	0.170773	0.519901	0.166753	0.65005	0.141752	0.917159	0.917005	0.999529	0.991671	-0.20774	0.500679	0.164363	10.1485	0.576833	1.34957	0.862234	0.747137	20.2969	1.17744	0.178125	4.06894	90389.2	0.180232	40.3497	353316
1087230	0	8.17	36	88	883582265	0.997059	27	43.3008	164	62.8867	16.8224	66	-550	714	11.1922	67.5135	-3.4728	883582265	0.612235	603.34	163.896	18.4262	-1.96204	0.806939	0.225166	0.561086	0.207099	0.750394	0.180938	0.898622	0.898083	0.99901	0.987117	-0.229265	0.584136	0.198014	12.7965	0.47215	1.70157	0.676467	0.664983	25.593	1.48014	0.258026	4.72235	20591	0.106221	44.133	118682
1117841	0	2.5	28	56	15392104	0.819021	13	4.50797	96	42.296	9.02592	43	-23	119	6.00227	43.9598	-0.10741	15392104	0.624405	143.512	5.09208	0.665151	0.359877	0.48383	0.257112	0.305635	0.25709	0.80912	0.188056	0.871459	0.871457	0.97429	0.935729	-0.0966094	0.335223	0.25707	2.24397	0.442096	1.53599	0.323556	0.626705	4.48794	1.27876	0.185236	4.9793	419.291	0.0526417	40.7332	4973.38
1123883	0	5.1	50	138	311008604	1.60772	45	5.14877	198	95.4076	27.0988	98	-295	493	18.8996	101.514	-0.619809	311008604	0.380706	1202.52	71.5338	11.0748	-0.799156	1.84443	0.303713	0.716571	0.286071	0.886499	0.218318	0.85948	0.858665	0.997011	0.97412	-0.339619	0.802157	0.274208	8.43496	0.230126	2.63226	0.751304	0.335478	16.8699	2.30796	0.537037	5.98585	1539.61	0.0510142	40.2563	11489.7
1147381	0	5.06	16	96	166726185	1.47975	48	7.96071	287	57.3482	26.7503	62	-250	537	19.4295	66.79	-1.01852	166726185	0.426646	1172.09	44.8165	14.1922	-1.09478	1.54884	0.279848	0.692479	0.249342	0.852129	0.215858	0.879795	0.878356	0.997724	0.97941	-0.348213	0.788493	0.228317	6.67077	0.28932	2.36721	0.766384	0.443116	13.3415	2.06948	0.457172	5.51905	2780.7	0.0744	46.9213	15945.9
1175145	0	1.93	40	91	13966490	0.871262	24.25	7.11015	118	67.358	16.6323	71	-70	188	10.4493	71.1359	-1.52396	13966490	0.692123	523.226	15.3423	2.32061	-0.648565	0.46113	0.185309	0.413772	0.172263	0.682073	0.154936	0.91601	0.915173	0.992981	0.971598	-0.158249	0.43063	0.161163	3.90809	0.624196	1.33585	0.483972	0.78434	7.81617	1.14048	0.16161	4.48753	244.163	0.0884649	56.3235	1910.26
1180374	1	10.7	21	64	742595285	1.08533	21	84.6201	217	43.6081	13.67	45	-849	1066	9.13062	47.8814	-3.61247	742595285	0.510283	390.966	337.843	8.59286	-0.253309	0.823049	0.276778	0.49519	0.263076	0.834132	0.20472	0.869756	0.869488	0.999432	0.988584	-0.196115	0.562853	0.258062	18.3768	0.329167	1.90983	0.600952	0.480284	36.7536	1.63612	0.274957	5.26257	21938.2	0.0677302	40.1856	165283
1192183	0	2.37	34	78	27042436	1.16364	23	50.5046	154	54.9474	16.8575	58	-362	516	9.33341	63.3892	-5.247	27042436	0.542356	998.976	94.3174	49.5611	-5.11156	1.27734	0.292304	0.618405	0.238702	0.835611	0.233852	0.887267	0.885637	0.99802	0.981909	-0.266875	0.652595	0.21108	9.69902	0.409199	1.87855	0.724279	0.601666	19.398	1.61935	0.392412	5.15842	502.865	0.0747199	48.4284	3650.06
1204988	0	3.73	17	55	27192961	0.811622	19	3.79547	106	36.1803	12.0445	37	-62	168	8.2392	39.3687	-0.370509	27192961	0.672599	240.885	10.1052	0.713467	0.272073	0.414713	0.249104	0.248273	0.248368	0.80006	0.184821	0.875939	0.875889	0.990425	0.958623	-0.0785342	0.285749	0.247724	3.17235	0.497238	1.49204	0.299175	0.680806	6.3447	1.23986	0.165954	4.85106	954.026	0.0543759	46.4317	11800.7
1212126	0	2.31	-3	53	8884048	1.20767	22	9.1745	76	27.8147	20.0738	36	-125	201	10.15	41.4134	-2.32895	8884048	0.578906	941.411	16.5659	13.5885	-2.46258	1.18374	0.310005	0.581724	0.295824	0.898515	0.218617	0.854421	0.853506	0.988194	0.951031	-0.236829	0.629381	0.283705	4.04318	0.416035	2.00139	0.782181	0.620301	8.08635	1.68383	0.373436	5.24317	238.325	0.0460087	42.9706	2998.73
1225496	0	5.55	11	46	82089856	0.571038	16	7.6838	136	28.8969	11.3452	31	-110	246	7.26278	32.9576	-1.13925	82089856	0.820042	251.172	16.1942	0.899309	-0.0477471	0.255481	0.1104	0.393478	0.109148	0.497059	0.0980809	0.94563	0.945551	0.997022	0.98443	-0.195564	0.41607	0.108103	4.01969	0.743688	0.938744	0.576336	0.859923	8.03938	0.824591	0.0914704	3.49113	17100.7	0.226275	37.5168	61974.7
1234619	0	4.2	38	66	67902053	1.00287	13	24.2995	161	52.3777	9.12729	53	-217	378	5.9187	53.9549	-1.02712	67902053	0.523936	167.708	43.8957	1.18936	-0.27439	0.659685	0.321845	0.344004	0.318057	0.894029	0.215523	0.841525	0.841344	0.99608	0.968227	-0.110633	0.396596	0.315435	6.61901	0.314087	1.8806	0.576298	0.458866	13.238	1.55326	0.245383	5.36124	1158.76	0.0496791	33.1614	12220.8
1237656	0	4	17	61	52199756	0.983441	23	4.1093	97	40.7316	13.6103	42	-90	187	9.65019	44.2076	-0.534186	52199756	0.548715	295.255	11.0894	1.03639	0.272898	0.662391	0.271425	0.418251	0.271017	0.831746	0.19498	0.86456	0.864532	0.984041	0.94581	-0.147802	0.472225	0.27066	3.31537	0.358008	1.80366	0.497191	0.532843	6.63075	1.53124	0.233454	5.22802	1567.4	0.058682	43.1951	14656.2
1242767	0	3.4	24	59	3278324	1.01765	17	4.04884	83	42.8875	10.9914	45	-9	92	7.16476	45.2654	-0.860247	3278324	0.532734	209.615	5.65131	0.87732	0.163334	0.643684	0.344966	0.302198	0.344846	0.90787	0.219804	0.827597	0.827589	0.965509	0.913795	-0.0936258	0.358585	0.344741	2.36148	0.304952	1.93172	0.327448	0.44975	4.72296	1.5863	0.247163	5.38578	80.465	0.0502906	30.7423	852.375
1245987	0	1.2	-3	42	1422524	0.759475	24	4.66614	62	20.4603	14.4805	22	-79	141	10.5209	27.4346	-0.781876	1422524	0.730424	334.034	8.63799	1.2055	-0.354207	0.369336	0.170718	0.36045	0.166816	0.65186	0.141597	0.917242	0.916982	0.990027	0.966767	-0.15127	0.398326	0.163402	2.93057	0.634411	1.25312	0.492476	0.790571	5.86113	1.08084	0.135013	4.59538	130.272	0.068927	51.4246	1380.5
1259961	0	5.91	1	48	63391297	0.89937	26	35.25	169	23.0019	16.1078	23	-491	660	10.7049	32.5721	-2.46218	63391297	0.698103	531.855	121.331	9.5335	-0.739083	0.580238	0.209003	0.465199	0.193095	0.718926	0.170443	0.905283	0.904828	0.998947	0.987187	-0.178534	0.486909	0.185438	11.0108	0.574977	1.51504	0.628488	0.751209	22.0217	1.30617	0.19731	4.45055	6492.8	0.108666	46.9951	41711.7
1262823	0	6.15	26	56	151246455	0.83629	15	7.06565	103	41.2532	9.48644	42	-80	183	6.41224	43.169	-0.730148	151246455	0.630953	161.733	10.5148	0.838403	0.367971	0.508378	0.233436	0.369979	0.232623	0.772236	0.176466	0.88382	0.88377	0.991029	0.961249	-0.134875	0.407338	0.231945	3.23203	0.460254	1.52503	0.471327	0.645557	6.46406	1.28952	0.185453	4.77322	6397.55	0.0788264	41.3513	51208.2
1273645	0	1.7	17	58	2237957	1.00655	21	8.69096	91	36.5962	13.659	37	-85	176	8.73166	41.3324	-1.29154	2237957	0.596316	369.083	10.3597	1.54016	0.165176	0.60256	0.296489	0.336068	0.280882	0.881923	0.214101	0.86214	0.86112	0.98284	0.944341	-0.11495	0.397343	0.267414	3.20672	0.413379	1.79744	0.359621	0.607873	6.41345	1.48239	0.224762	5.28758	60.8061	0.0464169	47.2241	781.174
1278252	0	1.46	16.9	49.1	3066257	0.660638	16	18.519	83	32.0634	11.2029	33	-126	209	6.68029	36.3547	-2.37006	3066257	0.775271	293.603	16.5993	1.53064	0.0149502	0.330464	0.127795	0.432526	0.123791	0.545122	0.11217	0.938761	0.938505	0.995118	0.979463	-0.201403	0.441805	0.120389	4.068	0.703006	1.02794	0.568731	0.834231	8.136	0.902113	0.114565	4.29052	276.041	0.118983	48.7592	1798.63
1282728	0	4.89	31	72	142389787	1.13551	19	20.568	157	51.4952	13.6651	53	-211	368	8.49987	55.301	-2.09447	142389787	0.4963	406.443	43.6505	4.19271	-0.674477	0.798128	0.348358	0.390145	0.336378	0.935353	0.230777	0.833537	0.832979	0.995768	0.966466	-0.123439	0.451951	0.328239	6.59833	0.295734	2.04274	0.556935	0.437627	13.1967	1.6888	0.286622	5.48946	2168.53	0.0465751	35.9821	23107.7
1292511	0	2.6	53	142	120024151	1.83024	40	55.4285	293	97.0079	31.6733	103	-919	1212	17.1964	111.237	-4.71673	120024151	0.364808	2963.08	464.418	440.903	-19.7365	3.09762	0.676128	0.633807	0.415316	1.16195	0.499963	0.818018	0.812851	0.998943	0.984362	-0.247832	0.743723	0.316721	21.5363	0.214513	2.98412	0.822073	0.367543	43.0726	2.45808	0.943437	6.17611	391.397	0.0403502	50.508	3538.63
1312989	0	6.1	22	64	271258001	1.29804	20	65.4553	141	40.6933	17.5328	46	-560	701	8.414	55.1531	-6.49032	271258001	0.476239	1385.91	177.998	181.065	-12.6693	1.96825	0.328084	0.707433	0.285847	0.908792	0.243443	0.862862	0.861221	0.998557	0.982283	-0.267389	0.683507	0.260172	13.3262	0.306474	2.14378	0.840253	0.452588	26.6524	1.8496	0.574084	5.46775	5417.67	0.0607533	41.3676	42468.6
1314750	0	3.91	34	86	130168698	1.35236	24	28.0509	251	55.5544	21.6469	60	-476	727	10.3633	69.4918	-3.99529	130168698	0.524955	1742.82	137.512	98.2634	-9.99484	2.03382	0.447456	0.62554	0.327928	1.01735	0.336899	0.850625	0.846993	0.99829	0.981072	-0.227444	0.649146	0.266797	11.7096	0.367145	2.25124	0.730572	0.573515	23.4192	1.87623	0.62032	5.47938	1374.26	0.0509835	50.3611	14150.2
1323991	0	5.24	71	139	390756237	1.30217	33	43.5921	231	107.224	22.3956	112	-622	853	14.2313	112.146	-3.48317	390756237	0.508809	1079.63	247.218	41.4183	-3.65588	1.28677	0.255917	0.663455	0.219324	0.785697	0.206182	0.894208	0.893222	0.999224	0.988542	-0.311692	0.713636	0.203015	15.715	0.406036	2.00901	0.746959	0.606008	31.4299	1.76075	0.385673	5.01066	3039.4	0.0978243	47.0901	15808.7
1326079	0	2.7	45	89	26811234	0.844015	22	6.72905	139	66.4409	14.4848	67	-71	210	9.34795	69.3483	-0.887111	26811234	0.699539	394.797	15.3618	1.79292	-0.430086	0.459475	0.163852	0.469451	0.162005	0.639448	0.136776	0.919305	0.919182	0.993713	0.973043	-0.197279	0.489265	0.16039	3.90996	0.608373	1.34708	0.564353	0.772993	7.81993	1.17961	0.155832	4.52905	555.32	0.0996089	48.7106	3899.93
1337858	0	2.23	34	65	24265000	1.00716	16	3.66307	87	49.093	9.50706	49	-19	106	6.69717	50.5925	-0.172619	24265000	0.49985	149.473	6.32953	0.740859	0.0108452	0.727444	0.27546	0.450612	0.275405	0.836029	0.196285	0.862306	0.862303	0.972457	0.931151	-0.165231	0.506846	0.275357	2.49329	0.303648	1.84285	0.458435	0.368239	4.98659	1.56712	0.250726	5.44232	483.753	0.0510288	40.847	4738.58
1351189	1	16.16	28	65	3290080775	1.00217	20	12.5944	224	44.9888	12.4742	43	-337	561	8.46954	47.9635	0.465185	3290080775	0.543254	276.506	69.7325	2.14026	0.560732	0.816027	0.166363	0.661088	0.16447	0.642965	0.138126	0.918061	0.917953	0.998853	0.987359	-0.348866	0.697343	0.162987	8.34087	0.417061	1.63053	0.718428	0.585388	16.6817	1.46094	0.245598	4.36042	276181	0.193112	36.9522	776941
1356550	1	18.05	14	76	3851811058	1.04541	30	13.1069	181	39.2729	19.3748	34	-825	1006	13.1463	46.637	0.438987	3851811058	0.576421	632.649	334.711	6.37949	1.08158	0.969095	0.134343	0.75627	0.131137	0.560274	0.116448	0.934805	0.934695	0.999697	0.994045	-0.44447	0.76954	0.129456	18.2894	0.484318	1.59891	0.773922	0.66604	36.5788	1.46131	0.27586	3.98179	470441	0.265645	33.1827	1.02081e+06
1361626	0	11.54	23	56	821271182	0.886032	17	34.3327	166	39.5748	10.9227	41	-425	591	7.2222	42.4693	-2.41956	821271182	0.624	237.479	104.6	2.42676	0.169049	0.552257	0.241436	0.390401	0.238288	0.786602	0.181933	0.88126	0.88114	0.998582	0.982993	-0.14608	0.438604	0.236466	10.2236	0.45322	1.58805	0.637121	0.64067	20.4472	1.34498	0.198423	4.75497	38358.4	0.0842412	41.0689	284132
1362528	1	4.93	24	65	81729495	1.19676	20	72.3949	493	46.5666	14.3662	47	-139	632	8.67027	53.0918	5.01315	81729495	0.484995	650.295	20.0685	62.1248	4.94714	1.26789	0.403086	0.51786	0.357341	0.977784	0.269763	0.826423	0.825311	0.99766	0.97467	-0.152907	0.5208	0.33711	4.45558	0.274117	2.17778	0.733187	0.388299	8.91117	1.80424	0.417743	5.59975	1390.64	0.0479613	33.9913	14062.4
1363052	0	2.8	30	82	40709266	1.21345	26	9.5598	203	55.5079	16.8072	56	-184	387	10.7195	60.262	-0.747745	40709266	0.49601	550.382	32.269	5.31116	-0.555796	0.994791	0.276204	0.564501	0.2662	0.851187	0.202753	0.868446	0.867898	0.996643	0.973469	-0.23172	0.633664	0.258575	5.66475	0.327995	2.08069	0.584768	0.501052	11.3295	1.80063	0.317749	5.51456	557.843	0.0497629	40.8573	5560.28
1364555	0	1.51	10	61	2118017	1.05089	26	3.31689	78	37.9854	15.4574	41	-33	111	10.9931	42.6385	-0.687903	2118017	0.542909	375.149	5.32949	1.44556	0.347646	0.764472	0.189105	0.602338	0.189105	0.690612	0.151546	0.905448	0.905448	0.98109	0.952724	-0.295234	0.656011	0.189105	2.2772	0.409399	1.70815	0.617905	0.590199	4.5544	1.51905	0.238394	5.27657	66.3734	0.0569729	39.5845	632.488
1372081	1	4.41	48	124	206461210	1.55262	37	19.1751	187	87.0678	25.1634	91	-388	575	15.9923	94.234	-2.27077	206461210	0.408474	1299.25	106.462	37.0085	-3.42814	1.78383	0.328168	0.686701	0.303771	0.916532	0.232839	0.851301	0.85038	0.997752	0.976758	-0.295749	0.754644	0.289519	10.3004	0.248993	2.5364	0.785449	0.387579	20.6007	2.20311	0.527998	5.88023	1113.6	0.047897	38.9355	9497.03
1381170	0	1.37	2	49	2147110	0.864898	24	3.60002	74	27.4478	14.7075	30	-60	134	10.0823	33.2252	-0.672159	2147110	0.687985	350.53	9.37728	1.12809	0.00800867	0.448555	0.236304	0.309395	0.234337	0.78244	0.179402	0.88316	0.883028	0.986135	0.953198	-0.110821	0.377442	0.232615	3.05354	0.523337	1.56464	0.382756	0.710436	6.10707	1.32217	0.171215	4.88065	98.1455	0.0504604	43.1397	1338.13
1388627	0	2.27	38	66	11120452	1.01078	13	5.15694	110	51.4895	8.95525	51	-9	119	5.51688	52.959	0.12928	11120452	0.507352	153.482	6.75996	0.769792	-0.164868	0.684724	0.304373	0.384255	0.303952	0.871047	0.207647	0.848094	0.848066	0.982103	0.939224	-0.128213	0.439032	0.303584	2.58164	0.304544	1.87414	0.412664	0.428362	5.16327	1.5684	0.247274	5.43469	190.703	0.0480966	34.8818	2011.65
1395310	0	1.52	16	68	6594371	1.25054	24	9.1384	85	45.6069	17.413	52	-122	207	10.6855	51.7749	-1.98421	6594371	0.466459	600.648	21.1108	5.52725	-1.33078	1.05084	0.284132	0.570525	0.268908	0.864743	0.209749	0.867961	0.867069	0.989209	0.955536	-0.232653	0.629304	0.25674	4.57369	0.328045	2.02162	0.636232	0.497171	9.14737	1.72975	0.333743	5.35994	120.176	0.0488522	45.4369	1147.49
1396807	0	3.5	50	174	189288173	2.03337	63	3.40936	330	109.852	37.8658	105	-24	354	26.6048	119.772	0.583995	189288173	0.283285	2277.92	14.4434	42.4833	2.94539	3.67916	0.433445	0.789228	0.383223	1.04948	0.280211	0.816253	0.813396	0.993415	0.957965	-0.362058	0.870193	0.343951	3.69214	0.142285	3.33503	0.794373	0.243249	7.38428	2.85708	1.02815	6.48162	589.987	0.0447129	37.675	3737.94
1399065	0	5.1	39	126	175622987	1.65711	43	5.57616	258	80.2674	27.2993	79	-285	543	17.9534	88.1626	-0.232678	175622987	0.398136	1329.8	67.0124	16.1373	0.106021	1.91023	0.323014	0.709631	0.300567	0.919655	0.229108	0.85316	0.851916	0.997781	0.977	-0.322873	0.79211	0.283425	8.16183	0.255468	2.68194	0.730685	0.45646	16.3237	2.32968	0.558311	5.95053	1110.63	0.0491539	42.3749	8995.88
1424968	0	3.83	27	58	59137276	1.00239	14	10.9042	105	43.8501	9.92279	46	-97	202	6.28847	45.9693	-1.67408	59137276	0.531871	190.35	11.4347	1.08478	0.18957	0.69366	0.280784	0.423319	0.279373	0.843569	0.198699	0.860547	0.860455	0.989212	0.953471	-0.15435	0.480122	0.278152	3.36622	0.332039	1.82978	0.499667	0.485589	6.73245	1.54755	0.243611	5.31531	1517.98	0.0542427	34.9732	14884.4
1424991	0	1.62	27	76	4754468	0.971899	22	2.66286	90	52.5135	14.0751	54	-1	91	10.1059	55.3841	-0.352226	4754468	0.523555	309.726	7.22059	0.842272	-0.379628	0.68336	0.208832	0.529501	0.208576	0.731088	0.163457	0.895755	0.895737	0.979129	0.947869	-0.2309	0.572563	0.208352	2.66489	0.392054	1.6294	0.530391	0.561151	5.32978	1.41977	0.223048	5.06115	101.761	0.0656524	45.4121	811.511
1427411	0	1.46	-49	59	2836840	1.79424	42	8.25307	85	14.9264	35.0777	27	-234	319	18.8763	54.2193	-2.13531	2836840	0.390182	2716.93	35.9691	82.7679	-10.8989	3.33171	0.566158	0.700494	0.425978	1.14022	0.363253	0.808255	0.80098	0.989093	0.948628	-0.327563	0.798844	0.32299	5.93929	0.235518	2.83837	0.736295	0.429625	11.8786	2.42417	0.974467	5.77934	43.0684	0.0446305	42.251	376.525
1427708	0	5.73	19	57	116346507	0.858547	19	9.08555	99	37.707	11.9987	38	-109	208	8.16193	41.0587	-1.05657	116346507	0.643278	263.996	17.6814	1.46955	0.248012	0.524071	0.213588	0.419117	0.212538	0.739759	0.16633	0.893905	0.893836	0.991794	0.964602	-0.166126	0.462465	0.21163	4.19568	0.491982	1.50602	0.623588	0.677031	8.39136	1.29064	0.184415	4.67026	6519.59	0.0944662	44.0022	44395.8
1430096	0	1.42	0	71	5709515	1.54476	37	8.83033	247	38.6752	26.1075	35	-42	289	15.6319	54.6028	1.86965	5709515	0.455344	1485.7	6.0477	38.8535	5.92742	2.36386	0.463079	0.673791	0.393991	1.08628	0.301181	0.814042	0.809914	0.987801	0.944927	-0.246335	0.720361	0.338047	2.36048	0.265653	2.75959	0.70184	0.475475	4.72095	2.3001	0.706735	5.65438	92.4162	0.0482591	33.5145	871.984
1432007	0	1.74	11	62	7695687	1.23208	24	17.3298	106	37.5416	17.5008	42	-186	292	10.4724	46.1391	-2.70834	7695687	0.501903	719.447	27.8011	10.209	-1.28346	1.06675	0.315383	0.540116	0.301709	0.905789	0.221165	0.851346	0.850513	0.993727	0.962474	-0.207175	0.604223	0.290486	5.25482	0.323314	2.1037	0.704298	0.504173	10.5096	1.79115	0.345534	5.53828	164.883	0.0456107	38.3503	1814.38
1432505	0	5.38	24	61	98296007	1.05346	18	52.6584	135	42.4006	12.5825	44	-320	455	7.7102	46.8074	-4.08063	98296007	0.538349	393.114	69.256	6.77173	-0.277332	0.81191	0.240906	0.539932	0.224634	0.782166	0.188481	0.889744	0.889205	0.997636	0.979691	-0.234914	0.598763	0.215806	8.31343	0.381327	1.77901	0.604869	0.556087	16.6269	1.54096	0.263204	5.08809	3796.63	0.0846235	43.7592	24153
1435079	0	15.64	8	51	1371775438	0.584982	21	7.23315	270	25.8027	13.3568	21	-392	662	9.23178	30.9795	1.03354	1371775438	0.787268	293.946	82.8442	1.26887	0.463742	0.352687	0.0842901	0.613555	0.0835861	0.412618	0.0770031	0.958305	0.958274	0.999572	0.99443	-0.348237	0.564767	0.0831281	9.09819	0.72044	0.937128	0.673303	0.844281	18.1964	0.851849	0.109244	2.80268	600326	0.420002	27.1524	1.12527e+06
1437046	0	1.75	18	61	4526150	1.08738	23	3.74831	88	41.1664	13.6579	43	-32	120	9.53686	44.7024	-0.796578	4526150	0.511284	303.624	5.78684	1.21543	0.136173	0.785209	0.262479	0.497952	0.262394	0.817453	0.190451	0.868817	0.868811	0.973756	0.934406	-0.197437	0.562356	0.26232	2.37823	0.32075	1.90685	0.49998	0.463671	4.75645	1.64403	0.261922	5.45763	110.874	0.0489509	37.1859	1158.06
1442088	0	0.7	-13	60	632564	1.43352	40.5	2.6858	78	24.3736	23.0048	27	-67	145	16.8042	37.2861	-0.453626	632564	0.427055	796.177	9.8107	4.72708	-0.352519	1.35209	0.367474	0.5725	0.358579	0.942969	0.230254	0.822193	0.8216	0.978541	0.928581	-0.227996	0.66709	0.350796	3.09245	0.227964	2.5146	0.602658	0.396316	6.1849	2.13095	0.429892	5.37523	29.3429	0.0644898	21.7665	194.31
1445251	0	1.63	-115	58	12544826	2.18652	59	7.26582	103	-3.93235	54.181	20	-352	455	28.2663	78.4183	-2.08264	12544826	0.313691	6133.96	75.8024	419.216	-41.5731	7.5383	0.939544	0.76548	0.57075	1.37921	0.570515	0.766509	0.751141	0.992535	0.954692	-0.350015	0.858631	0.335999	8.61088	0.179903	3.40972	0.80207	0.37001	17.2218	2.83442	2.11946	6.17562	89.2186	0.0437346	48.4803	639.929
1451238	0	5.87	9	63	138243166	0.98225	34	3.85135	174	34.3753	18.2715	34	-109	283	13.9096	40.9499	0.0787964	138243166	0.588943	495.234	18.1375	1.93167	0.479077	0.728064	0.155356	0.647362	0.153588	0.618589	0.130871	0.923499	0.923383	0.996897	0.980826	-0.340394	0.680351	0.15206	4.24197	0.478084	1.56261	0.654579	0.659831	8.48395	1.4025	0.220855	4.26393	16717.2	0.20278	39.7143	48552.5
1451790	0	3.72	15	63	49423898	1.19385	23	11.5145	102	39.1005	16.0207	42	-263	365	9.79307	45.4177	-1.88486	49423898	0.504443	533.918	53.1677	4.62952	-0.369779	0.916628	0.27644	0.533876	0.268894	0.847328	0.200858	0.866732	0.8663	0.996637	0.973178	-0.216721	0.60016	0.262979	7.28063	0.336528	2.00976	0.644644	0.514261	14.5613	1.72582	0.298267	5.43203	1320.51	0.0551129	40.7792	12086.5
1459650	1	16.26	14	61	1746685957	0.905325	26	32.4727	539	36.1162	15.4119	34	-593	1132	10.7866	41.6914	-0.0512991	1746685957	0.626322	433.792	175.098	9.05474	0.656816	0.715917	0.160014	0.634009	0.153923	0.621303	0.135186	0.923819	0.923603	0.999698	0.993596	-0.318964	0.645967	0.150498	13.2272	0.509676	1.48571	0.761805	0.689531	26.4544	1.32439	0.218983	4.04532	223561	0.222471	35.539	629391
1459916	0	2.43	21	65	9840557	1.03312	20.75	4.31462	125	42.1942	13.8956	42	-53	178	8.93903	46.102	0.0454811	9840557	0.547789	345.042	10.8939	1.1621	0.276548	0.640266	0.29683	0.364895	0.295926	0.864998	0.205313	0.852188	0.852127	0.988591	0.950701	-0.123704	0.428808	0.295135	3.28755	0.360647	1.8519	0.415758	0.541918	6.5751	1.55229	0.234274	5.29387	214.843	0.0464023	38.1438	2536.26
1461863	0	1.27	-29.1	54	2500526	1.64042	41	8.68666	90	12.1418	28.4238	17	-238	328	17.8457	42.112	-1.81993	2500526	0.417816	1626	34.6499	24.3332	-3.33801	1.86912	0.431761	0.61451	0.372885	1.0343	0.282479	0.822697	0.819445	0.991528	0.954185	-0.256389	0.707036	0.327722	5.85566	0.272286	2.61773	0.654914	0.483899	11.7113	2.22641	0.575221	5.77109	59.6241	0.0422866	44.4191	589.121
1465184	0	1.44	23.9	60	2582136	1.0327	18	5.09145	87	42.1921	11.8727	44	-28	115	7.70262	45.0908	-0.849212	2582136	0.537369	253.002	5.42859	0.946643	0.234047	0.633363	0.312016	0.337781	0.310427	0.886033	0.211784	0.845051	0.844945	0.968872	0.922473	-0.104884	0.391729	0.309037	2.31262	0.339457	1.86904	0.35183	0.511445	4.62523	1.55174	0.236345	5.31531	61.3276	0.0482894	33.3201	682.458
1465719	0	3.25	9	63	21109382	1.36455	24	21.759	96	38.0673	19.5132	45	-269	365	10.566	49.4146	-3.42821	21109382	0.451722	992.681	54.0442	27.853	-3.53121	1.48787	0.343628	0.617093	0.315102	0.944158	0.240724	0.846837	0.845298	0.994763	0.965297	-0.242111	0.665745	0.293579	7.33196	0.273741	2.26826	0.709385	0.39912	14.6639	1.94246	0.457876	5.65482	410.436	0.0474767	40.5623	3905.13
1467802	0	2.76	50	120	41139109	1.35083	31	4.16687	153	86.2281	20.8174	89	-29	182	13.4102	90.6168	-0.842829	41139109	0.450512	776.106	10.8553	4.71754	-0.412564	1.21956	0.223941	0.688109	0.219209	0.76126	0.173515	0.891184	0.890869	0.991425	0.963578	-0.349087	0.759591	0.215068	3.25672	0.316808	2.12758	0.699463	0.483919	6.51344	1.89207	0.360875	5.45621	334.392	0.0667449	39.6246	2257.07
1470976	0	1.4	39	76	6593286	0.719297	16	4.32317	98	59.4006	11.3028	61	-2	100	7.23486	61.2932	-0.923402	6593286	0.687161	228.43	8.15837	0.892686	-0.510342	0.423452	0.110693	0.580133	0.110693	0.499618	0.0981186	0.944654	0.944654	0.988931	0.972327	-0.3002	0.55422	0.110693	2.84253	0.638206	1.06981	0.580676	0.788233	5.68507	0.959119	0.133536	4.32611	220.24	0.125493	45.1368	1205.97
1472162	0	5.33	24	51	116916365	0.697302	14	47.3334	374	37.1866	9.34038	38	-372	746	5.82943	39.8538	-1.94981	116916365	0.74373	205.481	83.1997	1.93639	0.196549	0.350982	0.191333	0.291507	0.187434	0.694948	0.154549	0.906816	0.906652	0.999256	0.988987	-0.113904	0.335637	0.184986	9.1192	0.605734	1.23085	0.658117	0.7663	18.2384	1.03823	0.135579	4.24027	7798.64	0.105945	43.5234	54746
1473973	0	3.54	21	62	29980012	1.07766	20	4.6547	96	41.8659	13.2	43	-54	150	8.74486	45.3769	-0.808874	29980012	0.520886	306.31	11.2368	1.29437	0.130892	0.72543	0.303258	0.409504	0.30188	0.869755	0.207172	0.849289	0.849198	0.982186	0.93967	-0.148917	0.479188	0.300675	3.33635	0.319501	1.94306	0.466538	0.479627	6.67271	1.63485	0.257172	5.49036	692.674	0.0475737	37.7342	7584.1
1477467	0	0.51	30	55	49685	0.985228	11	2.97606	56	47.8571	7.14286	52	29	27	6.33333	48.6411	-1.13777	248425	0.510204	75.6463	2.48518	0.596971	-0.092761	0.589502	0.395032	0.196992	0.395032	0.935327	0.228363	0.802484	0.802484	0.920994	0.868323	-0.0628818	0.286917	0.395032	1.5609	0.27937	1.91543	0.248507	0.363381	3.12179	1.5204	0.246134	3.23686	3.95238	0.188209	2.18141	10.7143
1486746	0	3.61	68	117	453436301	1.21333	26	23.187	163	91.394	16.771	93	-391	554	10.6541	94.491	-2.14328	453436301	0.487714	575.682	106.935	7.54513	-0.526887	1.06413	0.196876	0.686302	0.189316	0.702958	0.159715	0.906181	0.905973	0.99865	0.985474	-0.363637	0.749693	0.185812	10.3305	0.356516	1.91174	0.756423	0.512505	20.6609	1.71496	0.315252	5.05414	5781.91	0.113851	39.3538	24768.6
1487427	0	0.8	20.6	52	87893	0.598347	17.5	3.35638	56	37.8	10.5964	43	0	56	7.34814	39.9757	-0.932328	439465	0.751405	169.215	1.34834	0.379604	0.243904	0.291957	0.230234	0.11737	0.230234	0.773238	0.17599	0.884883	0.884883	0.953953	0.923255	-0.030216	0.14133	0.230234	1.15449	0.562914	1.22234	0.130951	0.730396	2.30897	0.992109	0.130548	3.05132	8.81818	0.160331	4.49058	41.3273
1489963	0	1	16	103	3848577	1.67587	42	12.5502	160	59.4565	30.2741	67.5	-241	401	18.0393	74.6837	-2.24911	3848577	0.411745	2042.57	46.8435	45.6948	-5.26233	2.11575	0.462015	0.639097	0.345117	1.04352	0.335928	0.843267	0.838748	0.994549	0.966478	-0.295785	0.756196	0.274695	6.81385	0.294021	2.58574	0.713194	0.508	13.6277	2.20656	0.644442	5.70221	30.258	0.0438521	50.087	284.104
1494716	0	1.79	-25.6	71	6663395	1.68815	40	10.7084	104	23.6998	32.4326	32	-281	385	17.4388	55.6063	-2.34809	6663395	0.407352	2530.38	50.746	81.8666	-9.869	2.86608	0.460848	0.707599	0.334099	1.01941	0.33352	0.851197	0.845452	0.994548	0.967687	-0.374458	0.80799	0.24916	7.08114	0.280695	2.54797	0.740148	0.46155	14.1623	2.22115	0.831733	5.61442	123.669	0.0573871	55.8511	877.845
1500024	0	1.34	-42.2	50	2092143	1.54636	34	11.5363	76	11.7484	32.5236	27	-300	376	15.3736	51.9571	-2.68663	2092143	0.506311	2561.51	47.0065	88.3537	-11.4752	2.71211	0.480162	0.690899	0.362576	1.071	0.338879	0.836148	0.830414	0.992836	0.960967	-0.301571	0.745601	0.279706	6.8152	0.378281	2.40217	0.754392	0.599917	13.6304	2.03986	0.798067	5.44144	32.8916	0.0424408	55.5833	392.391
1502812	0	3.72	20	55	30630827	0.824602	17	5.39678	110	37.8126	11.4108	39	-79	189	7.32269	40.851	-0.453995	30630827	0.667794	239.004	10.1791	1.13133	0.427616	0.515374	0.163842	0.516505	0.162526	0.637543	0.136459	0.918926	0.918868	0.993713	0.972941	-0.238524	0.547691	0.161656	3.17666	0.543557	1.38918	0.536488	0.720316	6.35332	1.22304	0.169804	4.49887	2310.61	0.125885	41.3183	12257.4
1503291	1	15.83	32	62	3070836832	1.04623	15	105.771	248	47.2298	9.90844	48	-657	905	6.4492	49.3898	-3.93002	3070836832	0.501271	208.698	238.412	5.28012	-0.198796	0.750968	0.297943	0.431371	0.29535	0.862724	0.206261	0.852628	0.852553	0.999177	0.985238	-0.154777	0.48917	0.294081	15.4369	0.300735	1.9054	0.720334	0.410024	30.8739	1.60718	0.262228	5.3718	70045	0.055641	34.8533	631037
1509373	0	9.07	-2	34	108506306	0.664173	18	31.2376	75	14.656	12.6836	16	-404	479	7.7494	24.2287	-3.03184	108506306	0.774778	372.229	98.0448	5.68362	-1.02861	0.423663	0.125845	0.536202	0.120279	0.536297	0.110959	0.940696	0.940408	0.998972	0.990011	-0.224485	0.472867	0.116215	9.898	0.703515	1.0547	0.679118	0.834746	19.796	0.925784	0.137377	3.49732	44476.8	0.240623	38.4562	143210
1516912	0	2.29	5	63	6317305	1.24721	27	3.149	93	38.4499	17.3341	43	-35	128	12.0209	44.2589	-0.719322	6317305	0.466751	480.458	5.53603	2.61077	-0.196887	0.975412	0.301214	0.526246	0.299629	0.869907	0.206925	0.85045	0.850344	0.969952	0.925172	-0.212803	0.609428	0.298241	2.31675	0.281704	2.15419	0.575968	0.43135	4.6335	1.84825	0.319157	5.65207	156.822	0.048627	34.1517	1505.27
1517124	0	2.06	15	63	5748102	1.13737	23	4.24561	141	43.6167	14.9417	47	-18	159	9.99129	47.8072	-0.0500836	5748102	0.488713	383.111	6.07419	1.43981	0.0975881	0.823124	0.287673	0.481609	0.286849	0.857131	0.202458	0.856713	0.856658	0.983093	0.942658	-0.180156	0.555656	0.286127	2.43727	0.294293	2.0137	0.524165	0.405816	4.87453	1.72318	0.277699	5.49239	123.085	0.0489404	35.386	1229.11
1518746	0	2.3	-1	59	12696679	1.47044	24	18.1784	94	30.9967	24.9654	42	-335	429	10.9	52.5943	-3.39836	12696679	0.466521	1805.36	66.6401	70.5955	-8.41459	2.22731	0.401006	0.681615	0.3331	1.00361	0.284037	0.843577	0.840189	0.995192	0.967285	-0.295055	0.73071	0.284566	8.13526	0.30425	2.35974	0.761971	0.495014	16.2705	2.0321	0.657079	5.66583	210.627	0.0458882	43.4373	2141.33
1519088	0	5.88	20	57	79822063	0.848534	18	3.93546	102	38.6048	11.6239	39	-55	157	8.03393	41.3963	-0.315144	79822063	0.63396	223.326	10.4526	0.881169	0.382763	0.519716	0.222739	0.399216	0.222045	0.754618	0.170902	0.889093	0.889047	0.991439	0.963009	-0.149452	0.435731	0.221437	3.22154	0.468899	1.53309	0.401919	0.65508	6.44308	1.3077	0.185614	4.80153	3678.86	0.0789794	41.8555	29529.8
1532594	0	5.65	29	60	233864893	1.06021	16	47.3444	129	43.7552	10.9364	45	-268	397	6.57182	47.4982	-4.42885	233864893	0.531496	341.562	53.7332	6.78659	-0.467011	0.84109	0.248142	0.542299	0.241521	0.804596	0.18775	0.880255	0.879899	0.996981	0.975906	-0.226046	0.594098	0.236542	7.32017	0.364494	1.81549	0.726646	0.53643	14.6403	1.57014	0.272308	5.11572	7999.26	0.0771682	40.5838	55094.8
1538216	0	4.17	14	55	46374233	0.987424	19	16.6769	92	36.009	13.5962	39	-237	329	8.34336	41.1624	-2.32732	46374233	0.615227	397.701	38.2567	3.48409	-0.170611	0.66051	0.243153	0.459909	0.240826	0.789341	0.182004	0.879938	0.879818	0.995144	0.969928	-0.196322	0.532414	0.239121	6.17675	0.44939	1.7013	0.701656	0.642146	12.3535	1.45748	0.225916	5.00617	1763.7	0.0644393	41.0011	16838.8
1543713	0	2.08	41	71	30798672	0.810227	14	49.7627	95	56.1966	9.53656	57	-217	312	6.14924	57.9064	-3.45176	30798672	0.6401	195.088	46.0617	2.64066	-0.670884	0.509396	0.214128	0.405866	0.210452	0.74068	0.168158	0.895252	0.895126	0.995733	0.97374	-0.14625	0.425264	0.2084	6.78143	0.498791	1.42492	0.612151	0.680896	13.5629	1.21305	0.180881	4.83368	586.732	0.0638794	44.1783	5879.32
1546152	0	1.49	-31	49	2973226	1.61294	34	9.77919	136	9.50471	26.5493	14	-258	394	15.5518	40.5859	-1.79597	2973226	0.43907	1556.88	46.9123	32.9052	-3.95533	1.93806	0.437507	0.619452	0.361988	1.05035	0.298072	0.830835	0.82655	0.994744	0.964474	-0.259043	0.709851	0.303007	6.82168	0.302877	2.59466	0.669496	0.520987	13.6434	2.18681	0.593892	5.61787	80.5368	0.0446187	52.1026	792.521
1553338	0	5.01	15	50	33000191	0.652917	17	6.72044	121	32.3438	11.4015	32	-112	233	7.51822	35.8616	-0.387226	33000191	0.77001	239.937	16.692	0.95167	0.18901	0.319028	0.133233	0.407791	0.132575	0.561751	0.114988	0.933821	0.933778	0.996402	0.981072	-0.196122	0.442503	0.132008	4.0799	0.680121	1.07879	0.607606	0.819221	8.15979	0.943491	0.113065	3.92203	4491.72	0.175048	43.1156	19758.5
1565083	0	6.12	-2	54	106691700	1.24495	25	28.8709	85	30.4276	18.9234	38	-344	429	11.4895	41.9403	-3.70675	106691700	0.541294	833.152	65.2987	27.218	-2.92125	1.25055	0.260066	0.65299	0.249579	0.82534	0.195441	0.87685	0.876258	0.99684	0.975135	-0.292776	0.700817	0.241419	8.06542	0.385987	2.05596	0.817703	0.594864	16.1308	1.7996	0.377654	5.31647	4091.72	0.0674589	43.363	32832.2
1572521	1	5.17	45	119	233605151	1.37437	40	2.54705	162	82.7651	22.7984	84	-17	179	16.5219	87.3665	-0.16426	233605151	0.435275	782.84	10.2713	5.02204	-0.233296	1.409	0.220545	0.729461	0.219693	0.753276	0.170212	0.890293	0.890239	0.991525	0.963405	-0.381674	0.801206	0.218973	3.15819	0.287547	2.24242	0.733501	0.465159	6.31638	2.01858	0.407386	5.57138	2135.79	0.0697857	37.3327	13321.6
1573744	0	0.64	20.6	58	65611	0.977418	26.75	1.79078	61	41.4412	12.5986	43	14	47	9.92867	43.9288	-0.396237	328055	0.515571	212.364	2.30142	0.747575	0.0627404	0.740374	0.255787	0.487014	0.255787	0.795544	0.183894	0.872106	0.872106	0.948843	0.914738	-0.203266	0.537143	0.255787	1.47644	0.318026	1.79212	0.487014	0.395668	2.95288	1.53633	0.24904	3.41042	6	0.176471	2.89619	17.5294
1573794	0	2.01	49	97	50920756	0.854663	26	4.05557	133	75.0368	15.5386	78	-55	188	11.0271	77.5364	-0.783571	50920756	0.695003	381.369	16.0044	1.49919	-0.0802593	0.473899	0.160971	0.489779	0.157844	0.632768	0.135254	0.921589	0.921391	0.993835	0.973766	-0.22244	0.529576	0.155206	3.99076	0.596813	1.39828	0.516162	0.766396	7.98151	1.22839	0.158717	4.50495	1004.87	0.118639	46.6576	5886.68
1575137	0	2.45	36	82	30139447	0.960057	18	7.63645	151	61.008	14.5349	63	-101	252	8.22529	64.5875	-0.890665	30139447	0.638417	449.57	23.6462	2.45582	-0.679435	0.579528	0.173	0.5346	0.164854	0.658179	0.145113	0.918883	0.918388	0.996561	0.979505	-0.242529	0.564487	0.158182	4.85226	0.565294	1.46094	0.57703	0.740875	9.70453	1.27108	0.188132	4.4712	879.095	0.121674	49.8231	4612.57
1578370	0	3.19	66	102	102726891	0.680575	19	17.9498	179	83.5575	11.6971	83	-194	373	7.96649	84.9948	-0.964712	102726891	0.74424	242.265	37.5947	1.34072	0.358026	0.401223	0.13086	0.507308	0.128211	0.552199	0.113718	0.936263	0.936149	0.997993	0.985782	-0.240436	0.505793	0.126511	6.12594	0.642481	1.14636	0.594172	0.793355	12.2519	1.01386	0.133021	4.05366	2408.89	0.169401	38.5243	10583.1
1578520	0	0.8	40.9	64.1	197813	0.951763	14.75	2.70899	77	52.2714	7.77796	53	31	46	5.50702	53.1592	0.00177527	989065	0.533061	93.5978	2.68826	0.578465	-0.181818	0.544261	0.389819	0.166784	0.389819	0.953884	0.234386	0.805091	0.805091	0.922036	0.87006	-0.0315412	0.194136	0.389819	1.62772	0.298574	1.87409	0.166784	0.432813	3.25545	1.48427	0.23352	3.72093	10.2857	0.146939	3.71347	37.3143
1583916	0	9.44	18	73	832197265	1.04768	35	4.29877	231	43.3264	18.5805	40	-256	487	14.3248	48.694	0.400244	832197265	0.515181	493.924	54.7029	1.98414	0.529772	0.909347	0.122118	0.762961	0.120875	0.530225	0.106901	0.939752	0.939686	0.999	0.989935	-0.474682	0.785239	0.119944	7.38282	0.423895	1.56523	0.789371	0.567808	14.7656	1.44142	0.257866	3.91376	101149	0.288194	32.6418	180816
1586538	0	1.2	-5	49	1962263	1.11975	21	25.6876	79	23.6088	21.2484	32	-339	418	10.0118	43.861	-3.92431	1962263	0.643802	1366.41	63.5909	35.1875	-4.44173	1.19935	0.296578	0.593364	0.229435	0.828923	0.241829	0.89468	0.891817	0.996481	0.977631	-0.251331	0.605023	0.186367	7.96019	0.55602	1.66911	0.693306	0.739203	15.9204	1.44767	0.373983	4.97506	60.7451	0.059554	60.5445	656.678
1591296	0	1.97	14	57	10970375	1.1039	18	7.26431	81	37.8555	13.6729	42	-93	174	8.08356	42.5125	-1.64155	10970375	0.549393	374.27	10.4741	1.72326	0.0503804	0.671198	0.318475	0.353314	0.315606	0.895798	0.214934	0.842672	0.842484	0.981318	0.936974	-0.123477	0.440227	0.31313	3.22271	0.359522	1.94065	0.481036	0.550112	6.44541	1.61436	0.247418	5.31444	278.005	0.0457998	37.4308	3334.81
1601176	1	8.54	12	65	382266085	1.19121	28	80.1232	135	39.1895	17.5873	42	-783	918	11.7679	46.9018	-4.49192	382266085	0.498422	663.958	300.081	30.5543	-1.66978	1.01475	0.284217	0.559284	0.257112	0.835565	0.215377	0.874066	0.873541	0.999222	0.987201	-0.234968	0.626847	0.247066	17.3176	0.331737	2.01293	0.662416	0.49783	34.6352	1.73644	0.324741	5.29216	12857.1	0.0739872	42.7478	86613.3
1601803	0	4.31	46	79	58808297	0.663235	16	14.9447	112	62.1001	11.6531	64	-103	215	6.84961	64.5932	-2.44131	58808297	0.761027	315.858	23.8905	2.25952	-0.733348	0.388402	0.129156	0.493955	0.122668	0.545689	0.113752	0.939695	0.939315	0.99654	0.982589	-0.205137	0.446633	0.117483	4.88115	0.697801	1.02579	0.524634	0.830437	9.7623	0.892188	0.12939	3.94998	2286.57	0.162226	43.9136	10726.7
1609883	0	1.13	-4	57	4110126	1.29755	32	6.61453	86	27.0235	20.9014	31	-129	215	13.6465	39.1251	-1.40047	4110126	0.515976	800.506	17.222	6.6668	-0.769207	1.07837	0.316102	0.542573	0.293154	0.9085	0.226319	0.857117	0.855718	0.988042	0.951678	-0.214801	0.615996	0.274308	4.12687	0.346475	2.18446	0.600212	0.552894	8.25373	1.85619	0.348617	5.52993	123.84	0.046123	42.8232	1385.4
1611112	0	0.95	7	48	902949	0.608038	23	2.32222	62	28.2503	12.6917	28	-9	71	9.49966	32.1238	-0.179582	902949	0.794014	233.863	4.27955	0.536346	0.13595	0.255345	0.152085	0.249463	0.152085	0.60938	0.128068	0.923957	0.923957	0.984791	0.961979	-0.0992128	0.288237	0.152085	2.06245	0.678528	1.07018	0.32754	0.818176	4.12491	0.918098	0.101858	4.6495	49.6469	0.0567393	44.2612	694.762
1614731	0	4	78	165	414905173	1.66538	44	23.1293	239	124.246	28.6764	130	-493	732	18.6462	130.79	-2.69796	414905173	0.384725	1668.83	170.866	63.6353	-5.23254	2.18195	0.384953	0.697062	0.309446	0.964946	0.286014	0.854228	0.851981	0.998324	0.980913	-0.318125	0.789292	0.271835	13.0544	0.240347	2.68427	0.71813	0.421531	26.1087	2.30672	0.641726	5.96959	1232.95	0.050833	43.4725	9331.49
1616573	0	4.85	11	45	94070537	0.756762	16	99.5922	728	28.8937	14.842	29	-313	1041	6.80004	47.2112	5.49721	94070537	0.791551	1394.05	65.1804	394.514	17.9483	1.8195	0.225246	0.778057	0.129197	0.561531	0.208056	0.945017	0.943139	0.999547	0.99454	-0.338095	0.602182	0.0926411	8.04871	0.739697	1.13147	0.858954	0.858528	16.0974	0.98783	0.511187	3.29822	13804.9	0.327092	43.0436	33407.4
1620556	0	1.34	-6	105	9294098	2.12309	51	8.61276	405	47.1855	40.8933	39	-196	601	22.0523	78.3244	1.24391	9294098	0.321891	3908.25	31.8124	206.206	15.7102	5.07168	0.895351	0.697154	0.526423	1.36987	0.605908	0.783932	0.771297	0.994907	0.964033	-0.296589	0.823666	0.322499	5.54687	0.187908	3.44415	0.784531	0.365335	11.0937	2.79795	1.49176	6.17242	62.9855	0.0415746	50.836	487.665
1622020	0	3.92	36	86	28712543	0.872205	24	7.35679	110	62.7547	15.6396	66	-81	191	10.413	66.2087	-1.43975	28712543	0.65428	445.447	14.7171	2.54135	-0.837554	0.567151	0.159808	0.555789	0.155172	0.626827	0.134534	0.923172	0.922877	0.993892	0.974247	-0.254643	0.556306	0.151248	3.82297	0.575597	1.36208	0.604947	0.746014	7.64594	1.19727	0.18174	4.43481	811.388	0.123876	47.3096	4285.54
1626014	0	2.16	50	167	53064985	1.98456	61	4.4193	279	115.155	37.3057	121	-216	495	26.1295	124.473	-0.552265	53064985	0.298271	2232.81	63.5454	37.8995	-2.42483	3.1106	0.432481	0.75381	0.362186	1.04464	0.294244	0.829401	0.82585	0.996495	0.970254	-0.350007	0.846627	0.311616	7.92936	0.173735	3.16672	0.787756	0.339159	15.8587	2.70123	0.885769	6.29709	150.13	0.0438336	41.0867	1021.58
1633308	0	2.8	18	64	24703032	1.15348	22	4.92161	93	42.4823	14.474	45	-77	170	9.55494	46.6014	-0.985909	24703032	0.487111	366.951	11.6535	1.6016	-0.0717282	0.797576	0.330616	0.412297	0.328621	0.903271	0.217583	0.836022	0.835889	0.980587	0.934342	-0.14145	0.483291	0.326876	3.39656	0.280506	2.06382	0.465818	0.398827	6.79312	1.72775	0.282048	5.5247	558.219	0.0490742	32.2751	5540.89
1634952	0	1.68	-6	46	1403403	1.01476	29	3.61887	74	20.9323	16.7666	23	-66	140	11.8498	29.8032	-0.53567	1403403	0.622268	450.069	8.96248	2.0177	-0.0997449	0.62572	0.219863	0.477071	0.217803	0.756904	0.171151	0.891442	0.891305	0.987103	0.956508	-0.191786	0.537585	0.216	2.97669	0.488748	1.72037	0.533812	0.686834	5.95338	1.49522	0.211396	5.07264	85.2924	0.0539825	45.0423	983.184
1635585	0	1.66	8	61	5112820	1.32678	20	17.3264	103	31.4462	21.846	39	-222	325	9.469	51.2051	-3.42971	5112820	0.51949	1633.1	37.8736	55.6398	-7.03127	1.92056	0.334495	0.686282	0.267433	0.903478	0.258696	0.876565	0.87299	0.99497	0.971009	-0.327852	0.728569	0.217216	6.12183	0.39356	2.02527	0.792323	0.593721	12.2437	1.77059	0.563763	5.3544	115.614	0.0592894	50.4637	1013.01
1636782	0	1.7	36	76	13164199	0.985613	18	20.1257	270	57.6042	13.2492	59	-35	305	8.14304	61.0675	1.40365	13164199	0.595366	410.985	7.84696	4.05096	-0.0896617	0.67534	0.258493	0.442837	0.234175	0.812997	0.202057	0.886163	0.885245	0.994929	0.971036	-0.171006	0.49631	0.219779	2.78254	0.466531	1.64071	0.534754	0.656573	5.56508	1.40451	0.233458	5.01156	202.606	0.0573955	48.5751	2101.64
1637201	0	3.75	41	76	38004708	0.694355	17	3.60953	100	60.4459	10.7275	62	4	96	7.29664	62.0055	-0.719428	38004708	0.697105	190.974	3.46151	0.839239	-0.490816	0.420701	0.1172	0.561815	0.1172	0.518202	0.103073	0.9414	0.9414	0.98828	0.9707	-0.282194	0.541672	0.1172	1.83999	0.628046	1.08989	0.562026	0.781265	3.67999	0.972687	0.134475	4.03592	1813.16	0.183425	43.2934	6890.88
1637517	0	4.18	34	65	75404165	1.10037	15	10.1007	140	49.8886	10.7482	51	-75	215	6.41884	52.34	-1.39101	75404165	0.49424	250.602	12.8916	1.55435	-0.351502	0.754523	0.318009	0.405703	0.316572	0.889099	0.213186	0.841953	0.841858	0.98778	0.947272	-0.142529	0.47834	0.315315	3.57525	0.296601	1.97775	0.547078	0.426967	7.15051	1.65483	0.268133	5.45379	1338.96	0.0486452	34.4801	13603.9
1642197	0	3.83	11	58	36964862	1.06262	23	5.7663	88	36.2496	14.7437	39	-110	198	9.87163	41.1215	-1.04951	36964862	0.56585	376.949	17.9532	1.96696	0.0310888	0.682859	0.302506	0.384636	0.300973	0.869197	0.20681	0.849769	0.849667	0.988377	0.949874	-0.143728	0.467082	0.299632	4.22588	0.368279	1.90781	0.600836	0.558389	8.45176	1.60045	0.246341	5.30076	1053.8	0.0482068	37.1437	12369.5
1643087	0	2.06	5	71	17554435	1.35257	30.5	4.95874	105	43.6404	20.724	50	-93	198	13.554	51.5144	-1.26348	17554435	0.43379	749.25	12.3578	5.15067	-1.17689	1.22043	0.286165	0.617567	0.281257	0.863274	0.204367	0.860186	0.859863	0.989033	0.953241	-0.25825	0.680716	0.276994	3.48195	0.281877	2.20904	0.637328	0.424523	6.96389	1.91272	0.376649	5.63698	318.23	0.0481073	41.6707	2869.52
1645398	0	3.1	23	45	15658529	0.296238	11	7.44824	61	34.6817	7.3821	36	-38	99	4.52553	36.1759	-1.44991	15658529	0.914491	105.871	4.1237	0.211855	0.0705201	0.0995412	0.0604385	0.242329	0.0604385	0.327082	0.0566519	0.969781	0.969781	0.993956	0.98489	-0.121144	0.233841	0.0604385	2.02828	0.86465	0.508823	0.428447	0.928984	4.05656	0.448384	0.0399949	3.08472	3307.59	0.276439	32.1675	10941.9
1650232	0	9.3	26	68	464686534	1.31381	19	127.497	159	43.933	17.4692	48	-961	1120	8.42873	59.3247	-8.70038	464686534	0.460746	1589.31	459.396	279.976	-13.9607	1.86277	0.421552	0.621938	0.297507	0.941675	0.330681	0.862339	0.860339	0.999287	0.988267	-0.237036	0.653322	0.256637	21.4251	0.291676	2.18104	0.729624	0.371217	42.8502	1.85423	0.571079	5.54008	8115.93	0.061468	45.6469	60834.5
1650718	0	2.31	22	61	25702294	1.07892	19	9.95953	113	42.0445	12.7234	44	-162	275	8.19625	45.6105	-1.47642	25702294	0.524336	312.574	28.5396	1.67015	0.059511	0.711817	0.318417	0.380851	0.316166	0.890417	0.213633	0.842269	0.842141	0.993638	0.96051	-0.130213	0.451354	0.314411	5.33303	0.31858	1.94935	0.621027	0.479238	10.6661	1.62802	0.257558	5.46378	579.935	0.0469393	36.2826	6478.17
1655349	0	2.94	18	66	25753494	1.19633	24	13.6681	165	42.1912	16.0927	43	-227	392	10.0732	48.1028	-1.14525	25753494	0.500868	533.784	40.6111	5.03433	0.00611634	0.942916	0.300252	0.51601	0.293525	0.879615	0.210521	0.854308	0.853909	0.996345	0.970708	-0.20154	0.591947	0.288113	6.36006	0.311141	2.09218	0.663201	0.473943	12.7201	1.78412	0.310792	5.55041	542.418	0.0487348	39.4231	5574.66
1655375	0	1.95	4	60.6	7477019	1.34439	23	7.77519	86	36.2443	18.7633	43	-100	186	10.7477	45.2294	-1.90853	7477019	0.459996	732.045	10.8929	6.30192	-1.00675	1.0932	0.407406	0.45162	0.383939	1.00218	0.252662	0.811891	0.810377	0.976462	0.923989	-0.154567	0.527594	0.36388	3.27433	0.262708	2.33146	0.575982	0.415744	6.54866	1.90608	0.375151	5.60716	176.06	0.0481698	32.4928	1681.29
1660582	0	1.65	24	76	2585805	1.30628	25.75	12.9368	113	47.5376	18.3037	50	-152	265	10.7778	55.1554	-2.13483	2585805	0.455911	782.296	30.1062	7.56704	-1.17456	1.11419	0.327215	0.540683	0.30424	0.9204	0.230621	0.851496	0.850178	0.993517	0.962282	-0.219641	0.624747	0.286154	5.46892	0.279968	2.17694	0.624404	0.366531	10.9378	1.85544	0.360352	5.56679	43.7153	0.0514298	36.5141	387.525
1673703	0	4.56	46	177	574131271	2.062	75	2.37247	244	115.034	40.9301	119	-81	325	30.6501	125.118	-0.17798	574131271	0.264784	2421.74	24.6614	33.6872	-1.45784	3.74296	0.343051	0.831794	0.318611	0.948068	0.237659	0.844608	0.843136	0.993202	0.960508	-0.420464	0.900344	0.298716	4.87966	0.146632	3.21393	0.836714	0.250486	9.75932	2.82858	1.0215	6.44436	1792.84	0.0488846	37.4919	9710.96
1684732	0	5.27	27	116	363175699	1.72	44	4.68173	237	74.4222	28.8228	79	-117	354	18.6894	83.7486	-0.720485	363175699	0.37881	1475.15	25.8421	19.8413	-1.55285	2.16709	0.271759	0.776109	0.259267	0.848783	0.202495	0.872371	0.871614	0.995838	0.971329	-0.395772	0.849624	0.249062	5.03667	0.254075	2.65936	0.795691	0.449392	10.0733	2.36236	0.609714	5.93246	3208.1	0.0619563	42.1534	19614.8
1687340	0	0.98	40	165.8	6041136	1.89218	42	8.10969	362	89.8408	40.3627	73	7	355	20.7854	108.307	2.17857	6041136	0.377035	3659	7.07645	186.449	22.5343	5.59023	1.54468	0.572986	0.758185	1.64806	0.929737	0.717496	0.694734	0.978548	0.923556	-0.196834	0.703082	0.362044	2.46221	0.184678	3.561	0.603833	0.391881	4.92442	2.75848	1.78373	5.49135	26.8252	0.0520878	32.4199	194.173
1690431	0	1.9	-11	56	9508663	1.48267	26	48.8832	103	26.7136	25.3004	37	-600	703	12.2707	53.6788	-5.46221	9508663	0.477237	2167.79	171.546	132.995	-10.3822	1.99031	0.683182	0.478133	0.379712	1.06679	0.533781	0.833984	0.830873	0.997234	0.977165	-0.202938	0.630204	0.300464	13.0851	0.316126	2.41159	0.664707	0.521459	26.1701	2.00793	0.668373	5.70974	141.091	0.0427548	48.2562	1574.88
1694732	0	17.95	5	49	1723340551	0.71032	24	9.55358	599	26.4788	13.9935	26	-212	811	9.96258	31.8586	0.459596	1723340551	0.755001	313.845	36.6447	1.60984	0.221522	0.380793	0.152714	0.426719	0.151874	0.609424	0.128579	0.924179	0.92414	0.999474	0.991565	-0.183271	0.450946	0.151314	6.04878	0.636453	1.25535	0.750244	0.792338	12.0976	1.10064	0.133377	3.84572	306177	0.180325	37.6301	1.28193e+06
1695316	0	1	28	76	2925705	1.13716	23	5.89099	94	51.7753	15.8252	54	-50	144	10.3195	56.0885	-1.23805	2925705	0.493361	465.241	6.97936	2.33111	-0.742722	0.853762	0.272958	0.511854	0.26679	0.83937	0.198162	0.867633	0.867222	0.972989	0.933611	-0.206221	0.569816	0.261393	2.61417	0.341709	1.91025	0.573294	0.514795	5.22834	1.62826	0.28168	5.3869	46.6172	0.050126	45.8753	458.826
1700900	0	1	-27.6	17	208858	1.00582	23.5	2.608	35	-5.06963	13.7109	-5	-55	90	9.95421	17.5903	-0.218387	208858	0.511063	283.718	6.1353	0.837721	0.12017	0.779438	0.222567	0.556153	0.222567	0.751295	0.169932	0.888717	0.888717	0.977743	0.944358	-0.248517	0.609199	0.222567	2.44865	0.334305	1.76667	0.557391	0.436715	4.89729	1.5441	0.250501	5.38334	35.2607	0.0522381	38.198	344.967
1702466	0	8.46	3	53	269953225	0.984852	28	24.0718	127	25.5883	17.4733	26	-382	509	11.4256	36.4626	-2.68167	269953225	0.659408	674.764	82.2397	14.1296	-1.3953	0.805225	0.195772	0.604501	0.182874	0.701388	0.161217	0.910468	0.909834	0.998403	0.98484	-0.261371	0.60646	0.173765	9.06021	0.543666	1.60195	0.725966	0.727591	18.1204	1.40561	0.250249	4.37055	30532	0.150371	44.8999	133889
1703094	0	7.88	47	80	816745474	0.679011	17	20.2821	165	62.9345	11.1173	63	-294	459	7.10366	64.8856	-1.59704	816745474	0.74826	249.387	62.1606	2.22237	-0.540934	0.377988	0.14868	0.432634	0.146003	0.59959	0.126491	0.927377	0.927256	0.998531	0.986746	-0.17651	0.428174	0.14423	7.88056	0.646198	1.15576	0.594047	0.796188	15.7611	1.00443	0.131667	3.8681	34239	0.176494	39.2726	145159
1709091	0	6.55	46	121	676524616	1.56621	36	8.19177	224	84.9235	24.8986	89	-335	559	15.1167	92.0171	-1.36954	676524616	0.417349	1255.14	85.7385	20.1896	-2.19839	1.7683	0.317163	0.693747	0.293887	0.908905	0.227701	0.856378	0.855283	0.997825	0.977515	-0.306791	0.764784	0.278088	9.23989	0.26544	2.5361	0.767422	0.439057	18.4798	2.19407	0.521366	5.85432	4270.21	0.0534444	41.8238	33346.2
1712137	0	3.85	11	50	29796175	0.880529	18	29.8382	106	29.0401	15.4087	33	-269	375	7.81435	40.3621	-4.18342	29796175	0.718796	785.77	49.5871	20.7937	-2.62929	0.846442	0.19971	0.603782	0.168056	0.682571	0.170699	0.920661	0.919106	0.997604	0.983471	-0.257947	0.569927	0.145676	7.03031	0.624245	1.38455	0.721208	0.784347	14.0606	1.20361	0.261538	4.2864	2613.81	0.142909	46.5479	13146.8
1712422	0	5.57	30	54	76726969	0.848951	12	10.4674	91	42.0344	8.11715	43	-75	166	5.22261	43.5661	-1.60194	76726969	0.631971	131.12	10.4989	0.810437	0.33285	0.500877	0.252503	0.329335	0.252261	0.801779	0.185779	0.87391	0.873894	0.985151	0.949556	-0.114451	0.374676	0.252049	3.2306	0.446481	1.57222	0.409956	0.632827	6.46121	1.31925	0.188345	4.93623	2477.55	0.0612877	41.3109	25547.4
1714308	0	0.94	-15.1	44	185406	0.879117	33	2.70104	54	18.4182	18.3279	21.5	-43	97	13.3871	29.0302	-0.649268	185406	0.656694	503.525	3.64515	0.849775	-0.188854	0.408039	0.239428	0.252389	0.234003	0.776428	0.179246	0.883903	0.883541	0.976308	0.941771	-0.115975	0.319549	0.229256	1.8981	0.532547	1.48128	0.303434	0.713251	3.7962	1.22812	0.161867	4.86927	10.4455	0.0474793	44.7187	144.473
1716090	0	1.61	-10	90	8943353	1.91625	30	9.58293	181	44.4551	32.525	53	-264	445	14.5927	68.5177	-1.97961	8943353	0.356708	2718.42	57.4712	82.2196	-9.0898	3.08813	0.681085	0.623785	0.488306	1.25781	0.434666	0.782693	0.774664	0.993445	0.956989	-0.238649	0.733632	0.366297	7.54101	0.209305	3.08489	0.675825	0.393679	15.082	2.51243	0.942303	5.92791	78.4194	0.0411651	44.1316	679.529
1723167	0	2.49	17	45	7078691	0.449385	15	24.2063	92	31.7175	9.56888	33	-146	238	6.07376	34.8004	-2.59464	7078691	0.862009	205.066	16.3329	0.651457	0.0706741	0.170302	0.0832385	0.336217	0.0777754	0.398351	0.077051	0.961925	0.961656	0.996856	0.98716	-0.154081	0.311652	0.0739013	4.0387	0.819972	0.673355	0.423388	0.904178	8.07741	0.592416	0.063385	3.48644	1324.71	0.22664	42.0413	5038.44
1727861	0	1.4	-16	43	2327537	1.00339	26	5.04416	75	18.5295	17.9545	24	-94	169	11.4629	30.2713	-1.20746	2327537	0.633216	573.01	8.5815	2.36123	-0.529129	0.591711	0.199077	0.490598	0.193412	0.71824	0.16067	0.904238	0.903861	0.98839	0.961506	-0.201493	0.530313	0.188455	2.91259	0.544801	1.57926	0.53327	0.729115	5.82517	1.37017	0.197697	4.81435	182.32	0.0717797	51.6727	1608.37
1743272	0	4.64	26	86	221186291	1.66062	22	56.01	1094	63.6652	32.2178	52	-348	1442	10.1458	104.927	6.53783	221186291	0.413983	6956.52	81.1393	6298.1	229.744	11.1217	0.901563	0.850608	0.41765	1.15463	0.71962	0.829219	0.824167	0.998964	0.986536	-0.29409	0.775046	0.290608	8.86477	0.247651	2.7894	0.88032	0.38092	17.7295	2.33456	3.00583	5.94009	909.763	0.0452843	42.0755	8316.91
1746400	0	3.67	19	57	33194788	0.900295	19	3.77159	90	38.6157	11.7812	40	-41	131	8.08596	41.5044	-0.607786	33194788	0.614777	231.445	5.06373	0.861301	0.302666	0.52731	0.272399	0.318053	0.271914	0.829467	0.194338	0.864124	0.864092	0.972783	0.932046	-0.108422	0.365913	0.271489	2.23606	0.421357	1.66398	0.348367	0.608608	4.47212	1.38953	0.199927	5.08934	967.228	0.0501934	39.0835	11846.8
1749088	0	2.69	21	73	37237270	1.08175	25	8.49427	234	53.025	16.4076	58	-63	297	10.6441	57.5196	0.115625	37237270	0.536681	496.862	13.9813	4.0988	-0.349107	0.866646	0.174559	0.662779	0.165163	0.658053	0.146439	0.918804	0.918355	0.996538	0.979479	-0.35033	0.703203	0.158623	3.71593	0.450067	1.64828	0.683483	0.631477	7.43185	1.47469	0.260301	4.62357	1461.06	0.129815	42.6077	6040.35
1750445	0	5.72	59	121	417495696	1.30734	30	4.55964	238	89.6411	19.7396	89	-70	308	13.0527	93.3594	-0.0562344	417495696	0.475275	680.461	18.8012	4.28409	0.26536	1.11243	0.240379	0.643523	0.232966	0.792329	0.183617	0.884725	0.884258	0.99521	0.970981	-0.306544	0.720174	0.22674	4.31082	0.330129	2.12607	0.65259	0.507103	8.62163	1.86803	0.338203	5.3731	3812.41	0.0795909	42.8577	22765.7
1752076	0	2.36	29	64	14968822	0.985978	18	3.76844	101	46.0622	11.0264	46	-21	122	7.41641	48.249	-0.0335234	14968822	0.521182	206.239	5.74311	0.701463	0.206412	0.625106	0.32814	0.31113	0.328057	0.891781	0.214889	0.835985	0.83598	0.980699	0.934391	-0.0963597	0.355636	0.327984	2.38094	0.311843	1.85157	0.340281	0.45302	4.76187	1.52304	0.238312	5.34728	314.731	0.0489473	33.4226	3351.2
1755043	0	3.33	4	52	13807224	0.917904	23	4.88836	97	29.8366	14.9356	32	-91	188	9.9074	35.7802	-0.819152	13807224	0.664712	390.001	9.53463	1.6259	0.0193768	0.514663	0.205658	0.426526	0.204139	0.728571	0.162596	0.898184	0.898082	0.987929	0.959223	-0.174703	0.488304	0.20281	3.07528	0.532346	1.55012	0.533801	0.717712	6.15056	1.33957	0.18008	4.80902	793.107	0.0735379	46.7102	7168.91
1756927	0	2.5	41	82	30356167	0.972825	21	3.52504	130	60.0417	13.3583	58	2	128	9.14201	62.4245	0.358526	30356167	0.578961	291.804	3.24155	1.35274	-0.400114	0.684757	0.187102	0.570107	0.187033	0.689242	0.150885	0.906495	0.90649	0.981293	0.953245	-0.264333	0.616791	0.186973	1.76553	0.445799	1.64148	0.577828	0.633537	3.53106	1.45402	0.217965	4.92037	682.587	0.0876235	41.3285	4510.1
1758669	0	1.83	16	58	3237487	1.00257	21	5.72396	85	37.2005	13.574	39	-65	150	9.28605	41.2788	-0.964121	3237487	0.582881	320.061	10.6067	1.40258	0.202721	0.628087	0.276969	0.386552	0.275397	0.842404	0.198097	0.862564	0.862459	0.983735	0.944973	-0.137689	0.454212	0.274021	3.24327	0.392129	1.79107	0.462304	0.581958	6.48655	1.51463	0.226264	5.21612	96.3547	0.050713	34.3078	1107.47
1762068	0	6.28	25	60	165713243	1.17369	16	15.1975	127	43.173	12.2709	46	-249	376	7.00944	47.0086	-2.46091	165713243	0.485319	345.895	40.789	3.02023	-0.281934	0.875006	0.303635	0.483551	0.300275	0.877402	0.209362	0.850396	0.850198	0.995334	0.966673	-0.188864	0.566429	0.297578	6.37543	0.293327	2.04996	0.645204	0.426281	12.7509	1.74083	0.29466	5.52263	3878.51	0.0517204	36.1046	36394.1
1768616	0	3.31	30	75	61413209	0.964342	18	7.09793	136	56.2322	14.2817	60	-86	222	8.30995	59.8061	-1.45506	61413209	0.61112	414.713	14.3804	2.92441	-1.02047	0.719768	0.1468	0.658389	0.144973	0.599453	0.125296	0.927813	0.927696	0.994369	0.975881	-0.335899	0.66148	0.143421	3.7732	0.535482	1.45738	0.674041	0.713799	7.5464	1.30554	0.216642	4.36147	2663.11	0.155103	41.8773	10492.9
1769602	0	1.4	-15	48	4263419	1.1995	32	19.7379	66	20.3989	22.3469	30	-281	347	13.4403	39.3029	-3.19398	4263419	0.592638	1128.6	48	31.6455	-4.20569	1.24448	0.295633	0.608392	0.258529	0.871683	0.226247	0.876358	0.874436	0.995518	0.971673	-0.235605	0.617559	0.231298	6.91103	0.471984	1.92161	0.736927	0.675241	13.8221	1.63795	0.385029	5.07182	160.717	0.0582307	52.9929	1635.68
1771424	0	0.93	37	87	2754074	0.781905	19	5.65923	106	65.8386	15.7569	71	-17	123	8.761	69.5105	-1.56786	2754074	0.727085	496.988	8.45668	2.37671	-0.803321	0.437333	0.155594	0.446297	0.140738	0.593895	0.134438	0.932107	0.931116	0.99111	0.972348	-0.221553	0.464754	0.12774	2.89583	0.694966	1.10576	0.507931	0.829803	5.79165	0.93542	0.148232	4.35061	49.4561	0.0867652	56.4736	414.439
1774337	0	3.56	-5	55	27762945	1.29477	26	16.9703	95	25.6671	22.024	33	-261	356	11.4357	44.1548	-3.11011	27762945	0.554796	1290.85	49.8938	35.528	-4.60507	1.54545	0.292521	0.671134	0.262396	0.873495	0.221374	0.873457	0.871811	0.995551	0.971171	-0.292699	0.699803	0.239471	7.04131	0.415419	2.05868	0.764008	0.624117	14.0826	1.78638	0.459493	5.21799	927.411	0.0651272	48.2964	7900.3
1774378	0	4.97	20	64	89573602	1.2576	20	20.6562	109	41.6554	15.6939	45	-236	345	8.86606	48.7051	-3.15217	89573602	0.472557	637.01	40.5728	10.9485	-1.48083	1.08094	0.337351	0.520358	0.328492	0.922778	0.224649	0.837183	0.83664	0.994823	0.963598	-0.195738	0.587826	0.321188	6.35506	0.279916	2.15322	0.729276	0.40988	12.7101	1.81652	0.354573	5.61648	1813.94	0.0480387	36.5709	17843.7
1778229	0	1.6	-8	71	8593108	1.55051	35	4.65589	149	39.5071	24.7828	48	-100	249	15.4731	51.5791	-1.11537	8593108	0.390489	1099.59	12.0778	10.8081	-2.05789	1.66605	0.328625	0.667378	0.320321	0.917778	0.222221	0.841224	0.84067	0.987427	0.946811	-0.281062	0.735253	0.313054	3.42675	0.243073	2.50864	0.711956	0.389327	6.85349	2.16337	0.49867	5.75819	148.82	0.0460742	39.7513	1261.28
1779033	0	2.2	66	152	90955553	1.57203	45.5	3.3471	228	102.029	27.3911	96	-46	274	19.1258	107.744	0.430378	90955553	0.394019	1199.02	13.1299	9.79856	1.70181	1.85447	0.313035	0.710531	0.287098	0.910918	0.227723	0.860678	0.859045	0.991652	0.959445	-0.328705	0.787881	0.265313	3.56994	0.251623	2.55453	0.731481	0.421804	7.13988	2.19492	0.541876	5.72897	459.871	0.0586945	46.4813	3087.14
1787188	0	5.25	10	56	92981863	1.11656	21	8.24272	172	34.8442	15.0857	38	-108	280	8.91195	41.1503	-1.5812	92981863	0.571307	479.235	17.4702	3.31574	-0.191011	0.758273	0.2775	0.461829	0.274137	0.845356	0.199106	0.86347	0.863268	0.994459	0.965779	-0.195878	0.56206	0.271399	4.16533	0.401089	1.90279	0.670937	0.600153	8.33066	1.61742	0.258943	5.21517	2986.59	0.0543907	41.4655	31370.5
1789598	0	2.27	57	103	79176381	0.947694	23	10.7504	151	79.3705	15.5788	81	-86	237	9.72411	82.4571	-1.67129	79176381	0.662812	499.504	16.7101	4.81677	-0.448163	0.676506	0.189298	0.56029	0.178593	0.689342	0.155887	0.912432	0.911774	0.994931	0.974675	-0.254271	0.586704	0.169757	4.07287	0.550123	1.55451	0.621534	0.731707	8.14575	1.35853	0.216451	4.58237	1436.28	0.123339	47.7545	7718.44
1795577	0	4.5	55	180	755707609	2.02429	70	2.95791	261	120.162	39.4365	124	-110	371	29.0809	129.468	-0.400204	755707609	0.2784	2322.94	36.2387	29.9465	-1.92385	3.32413	0.445324	0.762879	0.393221	1.06374	0.285105	0.811533	0.808581	0.994625	0.961141	-0.329216	0.844182	0.352603	5.95977	0.139756	3.30401	0.771014	0.23155	11.9195	2.80006	0.942364	6.48813	2009.36	0.0445683	37.9627	12551.7
1802874	0	1.3	8	174.6	15619700	2.12079	58	7.83714	487	68.1948	57.1215	39	-51	538	29.1648	107.366	2.1766	15619700	0.352422	6876.92	18.9367	802.389	72.0823	11.4033	1.31824	0.794323	0.630971	1.5335	0.895117	0.767121	0.7479	0.991395	0.954906	-0.320196	0.858444	0.29406	4.05131	0.205078	3.70528	0.809573	0.421798	8.10263	2.95036	3.18038	5.9672	63.7572	0.0470533	44.3999	477.531
1803377	0	2.03	12	47	6856513	0.665124	15	10.5123	90	29.747	11.6287	31	-128	218	6.76096	34.4122	-1.32744	6856513	0.779032	299.316	16.4316	1.18891	0.089413	0.32188	0.121001	0.448324	0.112536	0.517482	0.108002	0.945101	0.944578	0.995419	0.981443	-0.220994	0.466295	0.105524	4.04738	0.714558	1.03853	0.483325	0.842325	8.09477	0.905275	0.11072	3.69495	1344.47	0.232205	45.4863	4510.59
1805663	0	0.94	7	60	737861	1.03553	26	3.26005	76	35.3178	15.6879	37	-34	110	11.4537	40.4931	-0.583888	737861	0.566114	392.346	5.25713	1.10136	0.187995	0.64433	0.346994	0.297548	0.346008	0.907363	0.219783	0.82716	0.827094	0.965346	0.913547	-0.0999016	0.365366	0.345146	2.27645	0.329004	1.95814	0.299659	0.50266	4.5529	1.60837	0.247831	5.06336	26.3156	0.058479	26.136	254.751
1809230	0	4.65	7	57	120971056	1.17745	25	101.415	120	26.5782	22.4748	33	-918	1038	10.5272	61.7991	-8.5723	120971056	0.596966	3112.73	402.189	2225.15	-86.9067	4.70731	0.571677	0.783947	0.288482	0.933089	0.485357	0.877568	0.874656	0.998883	0.987891	-0.254962	0.653478	0.215632	20.0289	0.449239	1.99681	0.839905	0.650406	40.0577	1.69064	1.31975	5.06545	2477.42	0.0782137	50.5324	18908.9
1816102	0	5.41	23	75	174695930	1.27904	26	180.092	158	46.5655	21.1457	53	-993	1151	11.1301	70.5988	-11.3999	174695930	0.477257	2815.85	463.666	1656.61	-54.2611	3.00749	0.5264	0.685643	0.278436	0.898046	0.446511	0.875841	0.874071	0.999159	0.989163	-0.266291	0.678119	0.230352	21.5185	0.324269	2.08922	0.79104	0.472138	43.037	1.79768	0.883472	5.38829	2371.51	0.0676609	44.4336	16727.9
1817495	0	6.54	21	61	289013206	0.979948	20	9.91939	147	41.3668	12.6963	42	-344	491	8.66458	44.6237	-0.738313	289013206	0.558805	280.061	68.88	1.32642	0.297201	0.653264	0.246878	0.450614	0.246019	0.794871	0.183535	0.877116	0.877073	0.997556	0.977641	-0.17489	0.505268	0.245408	8.29328	0.388289	1.72996	0.656001	0.569747	16.5866	1.48131	0.225035	4.99088	11464.4	0.0789884	41.6945	81104.9
1817672	0	0.98	30	164	610248	2.225	89	2.26025	214	92.6792	45.3471	85	-5	219	34.9865	107.304	0.364515	3051240	0.233179	2924.67	13.9326	39.9088	0.846439	4.22385	1.1975	0.557926	0.80914	1.47559	0.522151	0.653635	0.634266	0.969703	0.891033	-0.200413	0.745416	0.530913	3.62925	0.0740243	3.9668	0.610936	0.118154	7.2585	2.94213	1.35534	4.03875	12.2075	0.230331	1.56924	12.3585
1818188	1	10.1	23	54	589704307	0.822074	15	44.4941	115	38.7551	10.3369	40	-372	487	6.61401	41.7435	-3.37393	589704307	0.666315	240.562	84.3619	3.05421	0.0512853	0.504099	0.215431	0.399701	0.212671	0.743037	0.16812	0.894071	0.893937	0.998236	0.982294	-0.154296	0.438098	0.210742	9.18094	0.510953	1.45783	0.693823	0.692888	18.3619	1.24209	0.179882	4.49387	36282.5	0.107211	41.6191	225494
1827954	0	1.02	0	43	1221572	0.666368	24	2.59018	71	21.2812	13.3953	22	-32	103	9.97711	26.8062	-0.0852454	1221572	0.766421	265.683	3.90034	0.665815	-0.0931221	0.285229	0.152369	0.298372	0.152369	0.611591	0.12847	0.923816	0.923816	0.984763	0.961908	-0.109695	0.323779	0.152369	1.96647	0.668674	1.14072	0.308249	0.813191	3.93295	0.988354	0.109399	4.50307	126.861	0.0746242	50.2111	1302.92
1829302	0	0.9	32	73	2580527	0.960147	20	3.85763	91	54.1379	12.7181	56	-5	96	8.56409	56.6182	-0.701583	2580527	0.549252	274.713	7.35939	0.992987	-0.462635	0.660681	0.209623	0.515398	0.209623	0.732888	0.163889	0.895188	0.895188	0.979038	0.947594	-0.218738	0.55599	0.209623	2.69189	0.412779	1.61317	0.522199	0.591395	5.38377	1.40355	0.217576	5.12662	42.8609	0.0532433	39.1632	442.148
1843046	0	10.6	31	102	1868166400	1.41674	47	10.0171	257	65.9123	23.9687	67	-580	837	18.81	71.8106	-0.301504	1868166400	0.413747	812.326	189.926	9.57054	0.157355	1.56939	0.16734	0.807134	0.161508	0.638363	0.14019	0.919868	0.919722	0.999487	0.991513	-0.504122	0.867777	0.15897	13.7686	0.310184	2.10615	0.844554	0.44634	27.5373	1.93694	0.434183	4.87462	62616.9	0.172844	34.9009	149890
1844878	0	4.2	53	150	346236365	1.70831	47	3.84334	215	106.278	29.7667	112	-82	297	20.1208	112.959	-0.738839	346236365	0.372824	1464.67	22.507	16.3322	-1.88278	2.12742	0.277821	0.767761	0.258475	0.857639	0.208618	0.873867	0.872694	0.994493	0.967955	-0.38899	0.842392	0.242656	4.69514	0.258614	2.63944	0.777924	0.453553	9.39028	2.32724	0.60131	5.8826	1724.37	0.0635478	45.766	10116.6
1846816	0	1.4	21	66	2663831	1.04057	25.25	2.80644	92	44.011	14.6038	45	-16	108	10.7758	47.513	-0.32149	2663831	0.50371	320.514	6.19301	0.843367	0.0190519	0.720087	0.31083	0.396907	0.310293	0.883485	0.211084	0.844943	0.844907	0.968942	0.922454	-0.127511	0.456662	0.309823	2.46785	0.288443	1.93693	0.39934	0.369255	4.9357	1.62451	0.257729	5.37032	59.5254	0.0504453	30.0988	594.378
1846877	0	3.2	75	165	242573327	1.63853	41	5.32497	255	124.274	27.4732	129	-82	337	17.5287	129.677	-1.01476	242573327	0.403472	1372.14	26.0505	17.6786	-1.82927	1.82547	0.29188	0.721461	0.265618	0.877044	0.218984	0.871291	0.869812	0.995553	0.970772	-0.34667	0.799869	0.24522	5.06623	0.286946	2.52772	0.756481	0.490305	10.1325	2.204	0.529337	5.70725	926.719	0.064244	46.3251	5820.09
1848327	0	2.1	41	86	11060680	1.05558	24	20.0188	145	61.6433	15.2296	61	-159	304	9.96171	65.4125	-1.76952	11060680	0.581602	478.893	33.7299	4.83905	-0.77535	0.738694	0.261008	0.474302	0.232159	0.80392	0.205394	0.887423	0.886611	0.99492	0.971332	-0.20395	0.560747	0.217891	5.79745	0.436979	1.77868	0.637564	0.633682	11.5949	1.52757	0.249926	5.19136	149.108	0.0576821	45.0525	1503.44
1849171	0	2.5	7	60	22373003	1.19154	27	6.38763	92	35.4006	16.9552	38	-149	241	11.1847	42.0134	-1.23434	22373003	0.516572	511.924	18.1252	2.98449	-0.0836748	0.889284	0.266158	0.537522	0.26284	0.83132	0.194336	0.869129	0.868912	0.98979	0.956272	-0.221157	0.610222	0.25997	4.23902	0.346517	2.01522	0.572901	0.535833	8.47803	1.74238	0.28886	5.45729	651.744	0.0514196	40.5959	6547.55
1865509	0	4.6	44	80	148316047	0.925512	17	6.5002	170	60.378	11.7595	59	-90	260	7.68743	62.458	0.521722	148316047	0.620613	255.493	14.5462	1.50229	-0.324944	0.609346	0.21236	0.482838	0.211542	0.737463	0.165568	0.894364	0.894311	0.994264	0.969794	-0.208883	0.544047	0.210836	3.80091	0.463974	1.63384	0.555466	0.65488	7.60182	1.41897	0.205427	4.83316	3201.81	0.0842138	39.2118	23595.7
1870283	0	3.5	32	73	68103877	1.08007	20	6.49662	117	53.0873	13.5392	55	-79	196	8.53468	56.2882	-1.06236	68103877	0.523031	350.1	13.3605	1.9439	-0.579561	0.831791	0.222939	0.57663	0.221112	0.75997	0.172191	0.889748	0.889627	0.99144	0.963191	-0.256913	0.633068	0.219523	3.63431	0.364921	1.82842	0.599406	0.534169	7.26863	1.60063	0.263683	5.22715	1508.63	0.0701854	39.7115	11242.6
1875356	0	2	18	54	6219967	0.785566	19	3.47316	80	37.4738	11.165	39	-20	100	7.7087	40.0644	-0.661341	6219967	0.670317	200.867	4.94773	0.758572	0.361184	0.47317	0.234399	0.338423	0.234399	0.773576	0.17683	0.882801	0.882801	0.97656	0.9414	-0.11496	0.373114	0.234399	2.21088	0.476263	1.50516	0.356957	0.66139	4.42176	1.27076	0.176892	4.94283	209.189	0.0539842	34.2458	2597.48
1909488	0	4.2	13	69	77197285	1.41676	27	43.4388	176	40.0573	20.6818	44	-567	743	11.286	54.3436	-4.51845	77197285	0.453384	1348.63	178.272	50.4744	-4.15023	1.46904	0.488518	0.493486	0.367011	1.04125	0.349925	0.828911	0.826433	0.998149	0.978761	-0.175299	0.587629	0.319417	13.3427	0.269261	2.40224	0.590685	0.418623	26.6853	1.97827	0.489391	5.77603	1174.36	0.0449259	44.6132	11851.5
1915668	0	4	69	144	166989684	1.58972	39	4.5018	223	104.54	24.7629	104	-93	316	16.231	109.567	-0.34767	166989684	0.39073	1076.33	21.832	9.01142	-0.120452	1.6338	0.328688	0.66326	0.301093	0.930805	0.234774	0.853777	0.852198	0.993502	0.962737	-0.292804	0.756454	0.279446	4.6374	0.240303	2.60407	0.679651	0.376961	9.27479	2.23263	0.490623	5.91463	694.377	0.0499193	45.8615	5435.06
1920639	0	6.3	33	84	468799295	1.02729	27	3.71988	150	58.9428	15.9573	60	-124	274	11.1342	62.3528	-0.388383	468799295	0.556548	413.621	22.4487	1.54105	-0.452639	0.714843	0.235414	0.503747	0.23379	0.779393	0.17833	0.88337	0.883267	0.995296	0.970799	-0.203267	0.556743	0.232417	4.72534	0.397516	1.79374	0.512014	0.585713	9.45067	1.55303	0.237564	5.09204	8340.1	0.0691665	42.0037	67108.5
1921419	0	5.5	14	62	98784010	1.35379	21	46.5236	135	38.3621	18.6625	45	-587	722	9.17154	51.3146	-5.0837	98784010	0.461756	1161.54	177.286	55.7905	-5.06228	1.51206	0.368078	0.601071	0.309204	0.947382	0.269783	0.852226	0.850605	0.998394	0.980872	-0.229095	0.648533	0.281165	13.3041	0.29057	2.23777	0.697714	0.441024	26.6083	1.90249	0.470034	5.64083	1889.27	0.0503603	41.8103	17322.8
1935931	0	4	59	146	244406201	1.61162	50	10.6602	191	104.394	28.5472	109	-374	565	20.3138	110.615	-1.28431	244406201	0.390749	1337.57	114.183	18.3355	-1.75524	1.82039	0.269143	0.740671	0.247876	0.829188	0.205601	0.878625	0.877921	0.998162	0.981038	-0.380769	0.824115	0.236689	10.6675	0.272767	2.48852	0.769623	0.446065	21.3349	2.21246	0.522384	5.71682	1195.25	0.0598372	39.8111	7805.21
1945131	0	6.3	-10	51	136226145	1.27373	19	22.573	105	24.4997	24.356	36	-407	512	9.35941	50.1176	-3.88481	136226145	0.592203	1911.54	99.5929	102.582	-10.9491	2.07919	0.319501	0.72033	0.258176	0.889188	0.25036	0.87999	0.876991	0.997822	0.980467	-0.303888	0.699809	0.21493	9.95753	0.477182	1.96183	0.816081	0.678784	19.9151	1.68591	0.599673	4.90863	4840.28	0.0892464	53.5653	32118.1
1946100	0	7	16	76	311283341	1.24225	31	70.3759	147	47.0526	19.6253	50	-685	832	13.0524	55.5572	-4.79907	311283341	0.467335	872.648	240.265	51.8544	-3.5172	1.24538	0.280849	0.629248	0.245427	0.820815	0.218433	0.880597	0.879978	0.999046	0.986454	-0.281864	0.690631	0.233069	15.4927	0.30858	2.06701	0.722724	0.415678	30.9854	1.8066	0.381556	5.3655	7554.92	0.0749124	41.465	47130.7
1952070	0	6.6	17	91	417668574	1.46696	38	4.75573	165	54.1661	23.6365	55	-124	289	16.0151	62.364	-0.531811	417668574	0.422865	955.302	21.7631	7.8723	-0.426775	1.46409	0.248693	0.708637	0.237361	0.807987	0.19008	0.883131	0.882452	0.995055	0.970485	-0.354437	0.787978	0.228165	4.63241	0.285009	2.33605	0.71239	0.428492	9.26482	2.06749	0.428196	5.50971	8780.58	0.0817635	43.0982	45411.5
1969465	0	1.2	29	77	6307221	1.26671	22	15.2873	259	56.3658	16.9209	55	-9	268	9.54229	62.5902	2.42081	6307221	0.483105	740.421	7.74979	15.1512	1.96189	1.39453	0.327763	0.620709	0.263808	0.901721	0.255097	0.877527	0.874466	0.993647	0.967871	-0.293071	0.713737	0.219265	2.7355	0.332402	2.17422	0.664001	0.504556	5.47101	1.86687	0.430572	5.47493	87.6273	0.0544269	44.8508	777.799
1981102	0	8	14	109	941916835	1.56817	62	2.24209	169	61.8295	31.0408	64	-124	293	24.3889	71.7707	-0.0122707	941916835	0.366115	1328.15	23.1373	8.26019	0.627977	1.93984	0.211973	0.802777	0.204376	0.740664	0.168682	0.898978	0.898569	0.995782	0.974555	-0.464033	0.869893	0.198651	4.76501	0.255911	2.38123	0.831286	0.345929	9.53003	2.15354	0.537953	5.34419	19790	0.108225	40.547	66947.7
1985051	0	1.6	4	67	6482249	1.39363	32	21.2714	134	32.3611	23.1015	35	-294	428	13.5355	49.4584	-3.08197	6482249	0.486557	1398.89	51.6919	29.8878	-3.06996	1.48087	0.360511	0.599607	0.27944	0.930113	0.280394	0.870701	0.867919	0.99575	0.972728	-0.265219	0.69019	0.234426	7.17019	0.359277	2.21445	0.65114	0.561837	14.3404	1.8994	0.460345	5.48613	135.983	0.0513142	50.2876	1289.38
1991688	0	1.5	-26	57	4205330	1.52143	38.75	4.12733	76	23.3483	25.4251	32	-101	177	16.9211	40.2949	-1.18471	4205330	0.425696	1078.54	16.5962	8.25879	-1.30751	1.42279	0.416773	0.543472	0.398367	1.0028	0.250924	0.803884	0.802657	0.984117	0.934044	-0.200183	0.636888	0.382261	4.04281	0.245064	2.58289	0.621879	0.436518	8.08562	2.14749	0.45989	5.61344	128.273	0.0495261	30.4636	1102.55
1995089	0	6	11	67	249221946	1.38578	23	137.342	135	40.7343	19.0659	46	-647	782	10.0478	53.9912	-8.37495	249221946	0.435327	1255.77	206.326	194.999	-9.81021	1.6469	0.451359	0.556073	0.3378	0.933304	0.332142	0.836851	0.836305	0.998386	0.980387	-0.233084	0.660276	0.320603	14.3536	0.253423	2.33069	0.800096	0.357897	28.7072	1.97814	0.524564	5.78183	4150.85	0.0485508	34.8435	37218.2
2002210	0	5.2	43	73	304161063	0.794113	16	20.6994	137	58.1949	9.85771	59	-253	390	6.65143	59.7317	-1.60285	304161063	0.657145	181.223	60.7865	1.53788	-0.595783	0.524069	0.168115	0.513326	0.167027	0.64707	0.139092	0.916645	0.916592	0.997951	0.983307	-0.227132	0.527473	0.166274	7.79086	0.533208	1.35466	0.627183	0.709797	15.5817	1.18519	0.173046	4.39096	11682.3	0.137035	41.0623	56021.6
2014789	1	2	28	75	238042	1.61548	19.5	11.9401	238	56.8235	21.8893	54	-5	243	8.98275	68.319	2.47776	1190210	0.394079	1438.58	7.41286	22.3862	3.99512	2.04022	0.977932	0.338851	0.618872	1.43113	0.584929	0.741039	0.72647	0.975734	0.917555	-0.180498	0.6492	0.393177	2.67313	0.18928	2.91981	0.525893	0.289379	5.34626	2.21137	0.754538	4.13314	7.19608	0.1411	4.23376	20.098
2022374	0	6.4	31	60	161113681	1.01685	14	10.4778	199	45.6933	9.44666	46	-101	300	6.10078	47.5659	-0.332515	161113681	0.521791	174.636	19.3294	1.03627	0.231254	0.700476	0.283705	0.423121	0.283378	0.844905	0.199376	0.858365	0.858343	0.994327	0.964582	-0.154374	0.483646	0.283096	4.38466	0.323343	1.84894	0.642525	0.469064	8.76932	1.56464	0.246045	5.34154	3854.14	0.0541236	36.079	37156.7
2027288	0	1.8	80	157	73329571	1.54121	42	6.08079	186	120.175	25.4945	125	-57	243	17.3718	124.775	-1.25028	73329571	0.423969	1126.94	24.9872	15.2159	-1.93374	1.66143	0.353622	0.645239	0.32265	0.954778	0.244269	0.843542	0.841772	0.990591	0.954446	-0.2696	0.722571	0.298333	4.96588	0.263752	2.56883	0.693685	0.46736	9.93175	2.1901	0.503764	5.88682	214.214	0.0454806	40.1402	1996.89
2029791	0	4.1	28	62	39551348	1.14597	15	11.1518	115	47.0488	11.3742	50	-85	200	6.30341	50.0642	-2.09209	39551348	0.481133	292.833	12.6106	2.05757	-0.41653	0.8619	0.270178	0.521263	0.265748	0.835832	0.196221	0.867846	0.867569	0.989646	0.955813	-0.212033	0.58848	0.262039	3.53024	0.306568	1.95856	0.610877	0.419292	7.06048	1.67918	0.28302	5.45242	861.423	0.0545896	38.32	7592.27
2036267	1	6.6	12	90	392283098	1.50918	44	4.68035	183	53.0975	26.0139	58	-262	445	17.7893	62.8466	-0.652378	392283098	0.420279	1130.35	58.5624	10.7219	-0.979726	1.63358	0.184547	0.795913	0.177097	0.683667	0.151934	0.912647	0.912194	0.998178	0.983956	-0.46986	0.85839	0.170995	7.6289	0.323269	2.2193	0.806025	0.478595	15.2578	2.0196	0.454533	5.09084	15158.4	0.152622	42.4399	41742.1
2041478	0	1.6	14	77.1	4977500	1.18822	29	4.57399	101	50.7286	19.5416	57	-59	160	12.6504	56.8519	-1.21332	4977500	0.500194	658.755	13.5131	4.07656	-1.29782	0.988058	0.222023	0.629489	0.219708	0.762229	0.172787	0.890532	0.890377	0.991479	0.963437	-0.279884	0.663368	0.217682	3.64982	0.39996	1.83434	0.643156	0.59357	7.29965	1.60799	0.30252	5.2486	84.6078	0.0549401	48.2147	770.299
2045128	0	4.5	46	81	23411976	0.678141	17	10.4673	116	63.0727	11.3346	64	-102	218	7.5206	64.9783	-1.21498	23411976	0.740985	244.015	23.754	1.09454	-0.429651	0.353034	0.175877	0.332107	0.172115	0.666047	0.145228	0.914539	0.914319	0.995264	0.975478	-0.115102	0.340827	0.169108	4.86926	0.620435	1.19822	0.401741	0.777614	9.73852	1.01933	0.132228	4.63676	363.158	0.0654928	45.6573	4108.76
2045718	1	8.6	25	82	1058325239	1.24613	30	37.2804	300	53.7737	18.7127	55	-597	897	12.5717	59.8156	-1.76474	1058325239	0.475553	686.285	185.437	37.9745	-1.89123	1.19879	0.24208	0.663555	0.227753	0.78625	0.188075	0.887911	0.887426	0.999333	0.988644	-0.306054	0.713711	0.21998	13.6087	0.324312	2.05846	0.807748	0.466659	27.2175	1.81126	0.360217	5.2396	26752.4	0.0904423	41.6261	140666
2048282	0	2.6	76	194	222391751	1.94894	59	3.23485	251	140.329	35.8115	147	-69	320	24.7846	147.478	-0.602305	222391751	0.302118	2057.49	30.0209	23.6566	-2.12795	2.73959	0.452124	0.714282	0.391873	1.07464	0.292831	0.813618	0.810072	0.993141	0.957116	-0.295896	0.802754	0.343636	5.42662	0.167753	3.15046	0.726905	0.306324	10.8532	2.64466	0.79793	6.26858	439.698	0.0430023	42.4544	3089.16
2050685	0	1.7	31	79	7230676	1.12401	22	3.74746	120	53.7757	14.3853	53	-13	133	9.41874	57.0707	0.277357	7230676	0.493692	365.238	7.19074	1.55478	-0.114148	0.782605	0.305751	0.436867	0.305141	0.874083	0.208216	0.847531	0.84749	0.982025	0.938992	-0.158652	0.514148	0.304607	2.65918	0.308542	2.02052	0.473493	0.466712	5.31836	1.71296	0.272089	5.41188	104.827	0.0472194	36.4352	1096
2058855	0	5.7	20	69	139588930	1.10525	26	4.00711	130	45.0336	15.3542	46	-102	232	10.6756	49.143	-0.1775	139588930	0.495774	387.008	19.6641	1.45296	0.139159	0.814795	0.26829	0.503991	0.266915	0.828263	0.193729	0.866767	0.86668	0.992755	0.961894	-0.199872	0.570248	0.26576	4.41899	0.310723	1.95246	0.60382	0.437353	8.83797	1.67967	0.270771	5.41182	3296.36	0.0570304	39.0826	28655.7
2060784	0	8.9	31	65	472459022	1.24256	16	73.5573	429	46.5876	13.379	49	-569	998	6.94089	53.4726	-5.73117	472459022	0.46899	688.908	181.568	40.0049	-3.36687	1.2395	0.317644	0.588355	0.296829	0.898062	0.226103	0.854229	0.853505	0.999283	0.986547	-0.226045	0.628738	0.285286	13.4662	0.284722	2.11655	0.810441	0.356675	26.9323	1.80859	0.389286	5.545	9068.75	0.0548839	38.2559	77493.6
2062114	0	5.9	37	119	457623927	1.60655	43	11.6154	619	79.8057	26.2833	82	-241	860	17.9369	87.0867	0.545933	457623927	0.395442	1215.15	51.235	30.4653	1.36637	1.87728	0.333849	0.697525	0.293544	0.907569	0.24395	0.857771	0.856679	0.998981	0.984647	-0.329415	0.793116	0.274811	7.13086	0.244783	2.62741	0.721132	0.429324	14.2617	2.29109	0.552781	5.93286	3200.96	0.0530487	41.8507	23861
2072020	0	5.2	9	57	164359131	1.10865	23	34.0074	152	32.6629	16.8817	36	-509	661	10.1358	42.6466	-3.90356	164359131	0.585323	751.87	147.876	21.0559	-2.20546	0.958932	0.313259	0.502735	0.291676	0.897992	0.224591	0.857181	0.856226	0.998619	0.981846	-0.171024	0.524072	0.277595	12.1538	0.406502	1.92343	0.722856	0.60485	24.3075	1.61077	0.318048	5.1446	4932.2	0.0545778	44.1627	52895.6
2084441	0	2.9	23	57	22435807	0.952793	15	85.9788	119	39.845	11.4669	42	-332	451	6.8791	44.6377	-6.27124	22435807	0.604959	404.897	67.8908	10.5217	-0.72006	0.69237	0.288279	0.408694	0.26626	0.84837	0.214375	0.869356	0.868798	0.997183	0.97594	-0.142119	0.448925	0.256271	8.23346	0.420135	1.71366	0.636822	0.609114	16.4669	1.43774	0.245162	5.15715	608.027	0.0539988	42.4204	6811.83
2084447	0	0.7	-177.1	69.1	1112980	2.39877	64	4.48943	93	-14.5571	63.9563	7	-280	373	34.9114	89.162	-1.50214	1112980	0.245408	7737.95	43.1433	433.929	-45.1722	9.90941	1.58219	0.706197	0.801516	1.55012	0.840448	0.699649	0.675094	0.977669	0.918852	-0.40009	0.901708	0.383395	6.40675	0.113461	3.65397	0.865216	0.232393	12.8135	2.96482	2.8729	5.46073	9.81429	0.070102	19.0329	34.3571
2097331	0	5.9	22	60	112439245	1.09135	19	12.7686	279	42.1487	12.3446	45	-109	388	7.9279	45.5806	-0.714562	112439245	0.519839	301.076	18.972	2.54082	0.229972	0.77956	0.288552	0.458706	0.283197	0.857553	0.204495	0.859139	0.858918	0.996489	0.971726	-0.175005	0.529895	0.279839	4.34157	0.327632	1.93957	0.573793	0.490142	8.68314	1.64855	0.267028	5.36136	2957.14	0.0546405	36.0598	28133.7
2100125	0	4.2	20	58	36481001	1.15171	16	12.8406	94	40.1843	13.1294	44	-113	207	7.14974	45.0379	-2.46395	36481001	0.520649	413.633	18.4271	3.39986	-0.267523	0.815386	0.313343	0.442216	0.30794	0.895396	0.214867	0.846922	0.84657	0.987992	0.948805	-0.15971	0.517314	0.303292	4.27803	0.329568	2.00918	0.634994	0.507513	8.55605	1.68902	0.282182	5.46599	848.755	0.0471924	37.1811	9363.88
2102443	0	2.7	14	52	10336823	0.745349	18	4.34526	77	34.7568	11.5246	37	-39	116	7.78416	37.8902	-0.884039	10336823	0.720045	227.634	4.55658	0.732722	0.236424	0.367459	0.204843	0.282353	0.204079	0.725651	0.161782	0.898088	0.898037	0.979551	0.949018	-0.0961691	0.32246	0.203411	2.12506	0.567499	1.34779	0.323987	0.739601	4.25013	1.13987	0.143076	4.69298	462.561	0.0642446	45.6591	5184.32
2123362	0	1.5	37	66	4785007	1.01081	15	4.46225	98	50.9374	9.43024	50	-13	111	6.3094	52.4405	0.456773	4785007	0.499487	155.39	6.32718	0.693141	-0.0025227	0.680224	0.323272	0.355598	0.323049	0.894934	0.215178	0.838512	0.838498	0.967683	0.919249	-0.107035	0.407492	0.322855	2.49757	0.2849	1.90233	0.355918	0.345518	4.99515	1.57825	0.250874	5.40068	90.7161	0.0521357	31.0317	869.108
2127533	0	2.6	6	52	9123259	0.920586	22	5.80612	83	31.5188	14.3947	35	-86	169	9.61331	36.8734	-1.21943	9123259	0.660105	366.218	9.76213	1.40049	0.0284774	0.500064	0.257345	0.318351	0.255022	0.816821	0.189713	0.872876	0.872721	0.984903	0.949073	-0.120656	0.404073	0.25299	3.1147	0.484812	1.63957	0.462712	0.675998	6.22939	1.37566	0.189352	4.94835	335.288	0.0499684	41.6536	4429.3
2128385	0	4.1	24	70	102480876	1.18055	22	5.66931	138	47.8528	14.5529	49	-117	255	9.27343	51.8258	-0.675357	102480876	0.473644	396.018	20.4733	1.8352	-0.168607	0.863035	0.299262	0.483654	0.295594	0.871994	0.207367	0.852811	0.85257	0.991927	0.957838	-0.182916	0.554221	0.292417	4.50913	0.285973	2.06664	0.503801	0.369888	9.01827	1.75656	0.290574	5.54651	1890.79	0.0495556	37.7868	18071.9
2145226	0	4.1	15	54	29319283	0.791859	20	10.5859	92	34.5156	12.5127	35	-173	265	8.41543	38.413	-1.13368	29319283	0.692068	284.229	26.5256	1.37835	0.189217	0.442572	0.210138	0.354615	0.206592	0.733339	0.165439	0.897224	0.897054	0.994341	0.970547	-0.130792	0.389983	0.204124	5.14466	0.542188	1.42276	0.4425	0.720099	10.2893	1.21028	0.163177	4.64601	1608.42	0.0809473	45.5273	13751.4
2150307	0	3	48	94	82839906	0.806228	22	3.99598	148	71.4377	14.4373	72	-19	167	9.71715	73.897	-0.319801	82839906	0.711421	357.426	8.85468	1.39212	-0.134783	0.445134	0.136313	0.528379	0.13578	0.571612	0.117378	0.932199	0.932163	0.991991	0.972862	-0.255806	0.552117	0.135314	2.96267	0.628442	1.29026	0.535336	0.787522	5.92534	1.15155	0.145362	4.21872	2336.9	0.154047	42.7777	10792.3
2152215	0	3.7	30	72	64341898	1.23659	20	47.6951	159	50.429	16.9376	55	-396	555	8.59812	60.1732	-5.2867	64341898	0.507787	1077.73	93.1897	51.3461	-5.39215	1.3845	0.32118	0.613187	0.254922	0.874609	0.254744	0.880699	0.878699	0.99783	0.980725	-0.252869	0.650559	0.220926	9.63969	0.370958	1.98821	0.668198	0.555143	19.2794	1.70319	0.426421	5.19985	1376.15	0.0774422	49.5862	9023.38
2152926	1	4.3	25	89	39578913	1.11969	28	9.93264	117	60.4169	22.1518	69	-128	245	12.2654	68.8064	-2.30034	39578913	0.611932	1084.12	22.9081	21.0993	-3.98844	1.31807	0.18391	0.751098	0.171757	0.674455	0.152979	0.916084	0.915337	0.995084	0.975677	-0.366265	0.719425	0.161721	4.75651	0.532235	1.68345	0.803989	0.718922	9.51302	1.49659	0.375496	4.60095	1045.39	0.125047	45.6138	5115.75
2159969	0	17.8	15	66	4267164497	1.05488	30	13.3224	480	40.4515	16.7931	41	-362	842	12.2838	45.788	-0.803984	4267164497	0.527133	460.217	87.4278	3.62123	0.123441	0.842704	0.199848	0.616076	0.195927	0.712961	0.159665	0.902598	0.902414	0.999386	0.989698	-0.297687	0.665815	0.193264	9.34169	0.381562	1.76164	0.713972	0.546179	18.6834	1.56017	0.260638	4.64054	300936	0.147856	39.2467	1.07289e+06
2161829	0	2.2	53	100	41848117	0.891457	24	5.74017	142	77.2205	14.9878	78	-42	184	10.1462	79.7187	-0.708735	41848117	0.683866	392.061	9.37068	2.03019	-0.0278258	0.556593	0.184964	0.499872	0.182572	0.685957	0.15033	0.909113	0.908953	0.989162	0.963565	-0.218477	0.544689	0.18048	3.04594	0.548583	1.53908	0.573929	0.731543	6.09188	1.34937	0.185389	4.7768	543.829	0.082586	42.5233	4503.26
2163502	0	1	28.8	76	978810	1.08715	22	5.86806	106	53.4102	15.6317	57	-39	145	9.53278	57.6021	-1.26428	978810	0.532847	465.354	7.33233	1.41384	-0.548925	0.655518	0.317056	0.3368	0.307782	0.898023	0.216915	0.847654	0.847036	0.981513	0.938753	-0.119961	0.400365	0.299668	2.69211	0.375774	1.81928	0.356503	0.560348	5.38422	1.49122	0.243143	5.12264	14.0373	0.047584	36.5479	157.19
2173380	0	2.5	11	105	59205851	1.8675	47	18.1405	183	57.8353	36.3877	70	-523	706	19.6977	82.2111	-3.11067	59205851	0.376644	3413.74	163.153	232.687	-19.8174	3.8384	0.622829	0.712549	0.396175	1.15639	0.460873	0.828629	0.82216	0.997326	0.976001	-0.298723	0.796252	0.28556	12.7416	0.238745	2.99532	0.75025	0.445175	25.4832	2.49989	1.11531	6.106	398.172	0.0454534	51.7804	3299.4
2179218	0	4.8	77	187	832389803	1.84684	48	6.68229	266	141.708	36.3534	155	-117	383	21.2919	150.561	-1.69052	832389803	0.36544	2587.49	42.1937	75.4204	-10.0249	3.31069	0.342857	0.809763	0.299455	0.948429	0.250267	0.856943	0.854587	0.995868	0.970438	-0.379946	0.848888	0.266618	6.43826	0.257559	2.81006	0.830062	0.451478	12.8765	2.43948	0.913387	5.90804	2230.07	0.0607317	51.4233	13419
2184336	0	1.2	6	61	2898865	1.16649	26	4.51267	90	36.9195	16.6826	41	-68	158	10.8279	43.0385	-0.841898	2898865	0.520919	489.261	10.6513	2.12265	0.160032	0.826093	0.252608	0.529779	0.244935	0.811755	0.190287	0.878764	0.8783	0.985288	0.951263	-0.225099	0.605641	0.238662	3.24157	0.367987	1.93427	0.562201	0.558629	6.48315	1.67178	0.269675	5.33828	82.6013	0.0527804	42.0296	815.238
2187468	0	4.2	8	98	230520316	1.58123	38	6.57501	174	59.7973	28.1578	68	-373	547	17.1905	71.1433	-1.42736	230520316	0.442889	1485.65	95.9377	23.0241	-3.41313	1.91295	0.311747	0.716951	0.283597	0.903538	0.228598	0.862303	0.860911	0.997864	0.978333	-0.318647	0.772422	0.263812	9.7743	0.319767	2.49931	0.742543	0.53952	19.5486	2.16662	0.556175	5.62281	2660.51	0.0584151	46.4142	20171.4
2192423	0	5.2	28	64	141945198	1.07043	19	25.4529	106	45.6861	11.9321	47	-216	322	7.91079	48.7305	-2.43885	141945198	0.499295	287.436	41.5308	3.16384	-0.207367	0.860009	0.225143	0.584517	0.222993	0.764257	0.17364	0.888849	0.888719	0.99654	0.975247	-0.264979	0.643093	0.221237	6.43211	0.331387	1.82794	0.697634	0.44204	12.8642	1.60452	0.271288	5.17398	4786.4	0.0800736	37.4573	29845.3
2205490	1	10.3	10	49	430903151	0.621065	21	6.21798	145	28.9206	12.6747	29	-112	257	8.8524	33.3386	-0.367265	430903151	0.789635	275.064	16.605	1.06217	0.196336	0.315887	0.112052	0.474008	0.111194	0.502061	0.0992173	0.944544	0.944489	0.996975	0.98413	-0.224126	0.462978	0.11046	4.06867	0.709217	1.01696	0.536504	0.838359	8.13734	0.902453	0.106985	3.3257	114367	0.294996	34.8809	306134
2211400	0	4	9	49	44720344	0.610511	21	3.45278	122	30.4251	12.2484	32	-67	189	8.87973	34.084	-0.352011	44720344	0.789518	236.032	9.45068	0.557706	0.145319	0.267282	0.165393	0.234101	0.164958	0.641159	0.137127	0.917594	0.917565	0.993642	0.972517	-0.081924	0.260248	0.164577	3.07005	0.659215	1.12725	0.31535	0.805295	6.1401	0.959953	0.108169	4.099	4344.02	0.112846	44.5657	30392.5
2214411	0	15.6	19	80	4884476171	1.31077	28	8.78219	201	49.0698	19.0663	48	-581	782	12.3527	55.5447	-0.0173562	4884476171	0.452306	677.365	182.413	7.30516	0.2823	1.19524	0.261406	0.640542	0.253502	0.822597	0.193994	0.874411	0.874008	0.9991	0.985939	-0.295365	0.715517	0.247836	13.4974	0.290357	2.19359	0.677675	0.403272	26.9948	1.91791	0.364162	5.37896	128781	0.0813427	39.9648	716087
2214962	0	6	22	57	178503387	0.969596	18	78.0937	158	37.7103	12.7182	39	-501	659	7.72126	43.6924	-5.7639	178503387	0.61413	486.956	148.915	20.2329	-1.39686	0.797475	0.212516	0.575642	0.197637	0.731503	0.172066	0.90319	0.902609	0.999063	0.9877	-0.244197	0.586472	0.188652	12.1971	0.480272	1.60143	0.757523	0.667738	24.3942	1.39098	0.252498	4.54693	13156.2	0.140701	44.3742	57424.3
2219173	0	1.2	42	135.6	7149421	1.65697	51	2.53116	167	89.8209	29.3745	92	-13	180	21.4547	96.6729	-0.256037	7149421	0.35893	1277.85	12.1625	8.28334	-0.527824	1.73286	0.420618	0.608579	0.395283	1.00074	0.251574	0.806581	0.804892	0.984024	0.934723	-0.242718	0.706103	0.373114	3.43989	0.195546	2.78552	0.619612	0.310086	6.87979	2.34456	0.538368	5.57745	40.234	0.0525934	29.3611	274.582
2221025	0	2.4	13	52	5699029	0.750493	19	4.75763	85	31.8582	12.4036	32	-61	146	8.32684	35.8471	-0.467483	5699029	0.725717	270.069	9.66092	0.845623	0.213294	0.360123	0.178473	0.333407	0.176478	0.672685	0.146284	0.912093	0.91196	0.989537	0.964771	-0.123809	0.366148	0.174732	3.10089	0.606396	1.27855	0.362056	0.76939	6.20178	1.09489	0.134649	4.59778	351.057	0.0791561	49.2249	3218.56
2226602	0	2	-29	61	4969877	1.68048	45	4.54104	103	24.1324	28.9041	34.5	-126	229	19.1624	44.5864	-1.27794	4969877	0.370935	1405.58	17.0152	19.9399	-3.08645	2.06743	0.427598	0.65503	0.393423	1.03617	0.267222	0.808839	0.806706	0.988593	0.9444	-0.24405	0.721956	0.364896	4.07489	0.203229	2.81958	0.707832	0.365952	8.14978	2.36006	0.623756	5.93376	122.836	0.0491344	31.1578	927.338
2233813	0	6	13	53	90163152	0.943922	18	8.10942	132	34.7343	13.2107	37	-119	251	7.78864	39.6073	-1.46617	90163152	0.647936	362.263	17.1348	2.10256	0.0481015	0.578422	0.209471	0.465885	0.207882	0.733909	0.16437	0.896324	0.896218	0.994345	0.970331	-0.203923	0.532126	0.206491	4.12826	0.506652	1.59159	0.684749	0.69496	8.25651	1.37703	0.196973	4.74159	4989.94	0.0868194	42.2499	37240.1
2239698	0	3.4	35	72	39906897	1.02103	18	5.31683	151	54.1618	11.7412	55	-25	176	7.70725	56.435	0.142069	39906897	0.532331	251.41	7.30498	1.14429	-0.333119	0.722636	0.218789	0.534165	0.21853	0.750868	0.169302	0.890778	0.890761	0.991587	0.963584	-0.230582	0.590326	0.218304	2.67936	0.381537	1.73838	0.536484	0.555452	5.35872	1.5184	0.235356	5.14591	816.676	0.0651777	38.8848	6670.11
2240480	0	1.8	6	54	4901673	0.964186	24	4.23811	103	32.7461	15.1269	35	-56	159	10.27	38.2231	-0.62958	4901673	0.630046	388.702	9.90905	1.42106	0.145702	0.549371	0.243826	0.382947	0.243497	0.794663	0.182785	0.878307	0.878285	0.990625	0.959425	-0.142	0.454441	0.243208	3.1357	0.469179	1.67797	0.473361	0.664035	6.2714	1.43286	0.198299	5.12553	158.452	0.0472287	42.4007	2113.8
2241429	0	2.6	63	107	55142977	0.902687	23	4.79038	143	85.1886	13.9865	85	-46	189	9.65356	87.0919	-0.417307	55142977	0.632919	327.909	10.2929	1.33039	0.36562	0.593034	0.194522	0.505137	0.193032	0.70456	0.155721	0.903732	0.903633	0.988584	0.961443	-0.217403	0.547657	0.191729	3.19268	0.483709	1.57281	0.538006	0.671975	6.38536	1.37398	0.196889	4.91505	554.791	0.0763124	41.432	4601.32
2249864	0	5.8	16	60	112736063	1.05836	20	9.64043	137	38.8056	14.2579	40	-185	322	8.80766	43.7979	-1.10552	112736063	0.569517	412.387	27.5333	2.83161	0.137545	0.752161	0.225618	0.537114	0.223976	0.763938	0.17342	0.888283	0.888176	0.995491	0.972026	-0.238493	0.603659	0.222565	5.23465	0.41559	1.78303	0.675157	0.607841	10.4693	1.55345	0.244445	5.01757	4793.12	0.0815573	40.6036	33470.5
2251867	0	3.9	30	79	106826323	1.08127	24	29.8062	132	55.0581	15.7373	57	-336	468	10.0565	59.5689	-2.70811	106826323	0.538566	517.067	75.588	9.03709	-1.36419	0.853595	0.250442	0.543922	0.235935	0.800894	0.192678	0.883843	0.883368	0.99754	0.978651	-0.22041	0.587494	0.228179	8.68546	0.389834	1.82932	0.601893	0.57528	17.3709	1.58048	0.276009	5.10879	2048.81	0.0680556	41.4309	16213.5
2254249	0	4.5	20	70	119710360	1.15902	24	4.67503	153	44.6279	15.8077	45	-87	240	10.4855	49.3293	-0.31006	119710360	0.49012	441.738	11.6622	1.94874	0.113052	0.864265	0.276789	0.514366	0.27545	0.840464	0.197385	0.862498	0.862409	0.992525	0.960674	-0.2084	0.591893	0.274278	3.39341	0.306043	2.02408	0.563796	0.445407	6.78683	1.74201	0.285263	5.49545	2632.81	0.0535178	37.9742	24111.4
2260638	0	11.7	5	50	693388614	0.884996	22	23.6599	118	26.9647	15.6381	30	-399	517	9.63256	35.9912	-2.94283	693388614	0.706137	568.271	81.63	9.40924	-1.17789	0.657056	0.18197	0.561936	0.173783	0.674737	0.150631	0.914314	0.913914	0.998513	0.985569	-0.240683	0.558868	0.168029	9.02836	0.593339	1.4508	0.744263	0.763281	18.0567	1.26573	0.209757	4.13197	86013.5	0.160687	42.1086	377985
2261912	0	5.8	29	66	131227199	1.12352	18	10.2816	134	47.8494	12.1916	49	-104	238	7.5282	50.9609	-1.48574	131227199	0.483477	307.453	20.4126	2.10666	-0.327653	0.833359	0.288576	0.484586	0.288105	0.852574	0.201608	0.856026	0.855994	0.992203	0.95885	-0.191835	0.561959	0.287694	4.50292	0.292327	1.97839	0.691816	0.373903	9.00585	1.6884	0.280484	5.46827	2703.44	0.0535018	35.3048	24430.1
2266765	0	1.1	30	70	1324504	1.01808	22	2.9968	104	49.9794	12.3926	51	2	102	9.25628	52.2584	-0.0321987	1324504	0.498795	232.998	2.60446	0.749735	-0.165584	0.700919	0.278551	0.430171	0.278551	0.84274	0.198054	0.860725	0.860725	0.972145	0.930362	-0.150327	0.484986	0.278551	1.58061	0.314914	1.83005	0.430676	0.439422	3.16122	1.5515	0.244867	5.21065	25.5732	0.0527282	31.7069	241.915
2267507	0	6.8	2	59	147454104	1.17286	28	8.84149	124	30.1587	18.6089	32	-226	350	12.0205	39.8144	-1.40732	147454104	0.562001	675.643	37.6286	6.11052	-0.687664	0.860916	0.316299	0.459263	0.302273	0.905048	0.22044	0.851134	0.850266	0.995155	0.966568	-0.160682	0.514367	0.290629	6.12311	0.384923	2.04397	0.633993	0.589784	12.2462	1.70426	0.294304	5.24142	4787.47	0.0514671	45.1526	52277.3
2271813	1	16	13	50	1035341886	0.62265	19	48.2657	162	30.8292	12.1509	32	-328	490	8.07965	35.762	-3.64142	1035341886	0.787025	328.478	65.3068	5.85637	-0.35973	0.389343	0.125805	0.507599	0.120076	0.533139	0.110852	0.940774	0.940523	0.998973	0.990029	-0.223239	0.467321	0.116325	8.07718	0.696897	1.04343	0.696267	0.830135	16.1544	0.920144	0.128787	3.32755	238036	0.294037	34.5655	637133
2272133	0	1.4	8	61	2849077	1.07819	29	2.78424	87	36.4833	16.276	39	-33	120	11.9834	41.6168	-0.382116	2849077	0.541859	400.932	5.37729	1.5156	0.159137	0.759579	0.286294	0.452998	0.285131	0.853952	0.201561	0.857628	0.857551	0.971424	0.928775	-0.16511	0.523659	0.284113	2.29319	0.333936	1.96128	0.471537	0.510349	4.58639	1.67113	0.261468	5.42762	80.4663	0.0489157	34.6937	891.357
2284487	0	4.5	30	143	437432633	1.93058	47	4.68588	245	93.3415	33.9891	100	-115	360	21.1243	104.184	-0.934905	437432633	0.322714	2141.78	30.1694	37.9506	-3.98905	2.95823	0.376005	0.772771	0.333859	0.990143	0.260652	0.839538	0.837267	0.994289	0.963359	-0.357228	0.849003	0.302113	5.43356	0.191002	3.04605	0.797596	0.333507	10.8671	2.62313	0.833559	6.31103	1921.31	0.0476752	44.7589	13005.4
2288518	0	12.7	11	53	1178944656	0.842618	23	14.541	220	32.1935	14.1532	33	-481	701	9.41848	37.714	-1.29152	1178944656	0.693338	385.92	123.807	2.80991	0.131765	0.521558	0.173021	0.499515	0.166696	0.656073	0.144139	0.917561	0.917252	0.999236	0.989604	-0.222449	0.528359	0.162302	11.1229	0.577475	1.40086	0.604846	0.749062	22.2459	1.2191	0.173645	4.02507	162672	0.196256	41.2374	574690
2289943	0	3.3	46	127	110100595	1.62421	38	7.32565	191	90.1934	26.5874	96	-129	320	16.5334	97.445	-1.51729	110100595	0.386096	1360.67	29.5362	22.1639	-3.00325	1.85635	0.340894	0.686116	0.318509	0.945424	0.236062	0.844309	0.842984	0.99324	0.960492	-0.28689	0.750629	0.300501	5.3997	0.23752	2.60071	0.737626	0.350498	10.7994	2.23765	0.549311	5.92998	526.444	0.0454027	41.9229	4476.78
2291606	0	10.3	8	49	383514938	0.719793	21	9.01167	168	26.5219	13.8322	26	-161	329	8.97568	32.8126	-0.61171	383514938	0.760022	373.258	25.6805	2.40079	0.00758138	0.428383	0.114576	0.575152	0.113006	0.508679	0.101272	0.943754	0.943654	0.99824	0.987461	-0.289622	0.553362	0.11167	5.05985	0.685362	1.12801	0.680296	0.823837	10.1197	1.00973	0.13574	3.37095	109111	0.306314	34.9113	270723
2297411	0	3.7	55	91	125829820	0.624533	17	8.20212	190	72.2861	11.8836	71	-100	290	7.29107	74.232	0.0976942	125829820	0.800104	285.119	16.1077	1.21895	0.0486565	0.309997	0.0961407	0.52332	0.0933196	0.450423	0.0871456	0.953808	0.953622	0.997413	0.986719	-0.27735	0.50883	0.0908689	4.00677	0.743693	0.966269	0.582731	0.860454	8.01354	0.863678	0.101534	3.48392	6273.48	0.274731	39.4097	18270.4
2298013	0	3.1	40	74	82930463	0.953156	17	6.0387	115	55.6728	10.8124	55	-58	173	7.45539	57.4576	-0.365243	82930463	0.556126	201.91	13.4854	0.898894	-0.327531	0.610055	0.311982	0.323415	0.311727	0.875281	0.20941	0.844179	0.844162	0.988003	0.948052	-0.106	0.37444	0.311504	3.66209	0.342177	1.80487	0.504728	0.507017	7.32418	1.49208	0.230509	5.21106	1329.51	0.0529263	31.6492	13969.9
2301511	0	2	16	64	11241904	1.17273	23	4.50379	94	42.7665	14.8753	46	-50	144	9.61389	47.0886	-0.975823	11241904	0.476335	388.367	5.89052	1.82985	-0.178153	0.831434	0.343077	0.41497	0.3413	0.912705	0.220761	0.829646	0.829528	0.965774	0.914764	-0.149833	0.506114	0.339746	2.40173	0.269392	2.10941	0.537131	0.375106	4.80346	1.76168	0.293628	5.53345	264.691	0.0522073	28.1397	2415.02
2302614	0	3.3	14	139	145165051	1.99091	61	4.10959	185	80.3903	38.5402	86	-119	304	25.9368	94.9403	-0.958703	145165051	0.30663	2551.07	27.8853	45.4928	-5.06336	3.2623	0.378627	0.789792	0.326556	0.99425	0.268161	0.844789	0.841922	0.992573	0.959883	-0.383913	0.868366	0.286722	5.21186	0.195705	3.05576	0.800715	0.318469	10.4237	2.64967	0.910233	6.17962	802.083	0.0498034	49.0509	4938.28
2304502	0	0.9	-51	210.1	13230265	3.18675	133	4.20114	502	68.2123	87.9239	50.5	-296	798	56.0443	134.624	0.466966	13230265	0.142627	13470.7	72.2733	1279.07	42.5708	18.4761	3.33705	0.692762	1.27818	2.08749	1.62241	0.579819	0.536782	0.989034	0.93442	-0.230792	0.857782	0.44217	8.27463	0.0361412	5.62944	0.733685	0.108758	16.5493	4.02968	5.4533	6.48908	59.7096	0.081794	15.0063	104.118
2305246	0	4.6	36	141	320419305	1.75252	58	2.71711	234	93.9522	32.6266	100	-79	313	24.1041	102.004	-0.389772	320419305	0.34105	1577.89	19.8939	15.0719	-1.39332	2.4529	0.310943	0.774959	0.292528	0.903036	0.221918	0.856645	0.855575	0.99383	0.963684	-0.379312	0.848967	0.277917	4.39982	0.203351	2.8145	0.789499	0.351832	8.79964	2.47184	0.69096	6.09265	1580.95	0.0513379	39.951	10502.6
2306664	0	2.2	59	138	79054418	1.39287	41	3.50916	172	103.686	24.8395	110	-34	206	17.4676	108.261	-0.821651	79054418	0.455058	969.663	13.6426	5.87963	-1.26358	1.22121	0.294373	0.607698	0.274269	0.880685	0.216223	0.866045	0.864876	0.988861	0.954755	-0.253294	0.673222	0.258295	3.66202	0.338932	2.22812	0.617685	0.540489	7.32404	1.90767	0.378897	5.34381	404.341	0.0599467	52.2036	3069.37
2311332	0	1.5	18	75	4218386	1.14241	30	2.72366	111	49.0685	17.7277	51	-14	125	12.7492	53.7523	-0.298216	4218386	0.481375	481.588	6.7528	1.27371	-0.246422	0.787383	0.307153	0.437075	0.300944	0.891157	0.21344	0.850563	0.850149	0.982042	0.940018	-0.150853	0.50516	0.295511	2.57536	0.298945	2.01439	0.442994	0.432367	5.15072	1.6921	0.273634	5.39718	67.9507	0.0465416	37.8236	702.807
2312860	0	3.3	39	81	41237600	0.923067	20	6.45621	149	61.3456	13.8784	63	-58	207	8.60797	64.3453	-0.56512	41237600	0.638198	377.041	14.7099	1.67393	-0.524069	0.54941	0.201654	0.459723	0.198027	0.722746	0.161272	0.901591	0.901349	0.992273	0.967082	-0.185404	0.500761	0.194853	3.82399	0.519906	1.52469	0.497988	0.704172	7.64798	1.31232	0.187766	4.72994	865.155	0.0868629	48.9253	6356.46
2324166	0	3.7	39	83	167975061	1.29597	20	80.3385	226	53.0608	22.5919	59	-930	1156	8.38803	80.4551	-7.59081	167975061	0.571043	3657.58	429.898	880.885	-42.2138	3.24056	0.856753	0.561702	0.346482	1.03662	0.733152	0.86057	0.856549	0.998638	0.986778	-0.200795	0.59892	0.237695	20.7196	0.424141	2.13749	0.682765	0.629305	41.4392	1.74646	1.02433	5.23999	1626.02	0.0626596	54.1826	14818.6
2334476	0	1.2	26	79	4208299	1.00881	23	3.90526	126	57.4259	16.2149	62	-10	136	10.3603	61.2977	-0.808268	4208299	0.582569	459.677	7.85362	2.09162	-0.745205	0.650318	0.187268	0.546187	0.181737	0.688563	0.152935	0.910053	0.909684	0.989082	0.963837	-0.24948	0.580512	0.176898	2.78164	0.505351	1.54205	0.590885	0.690428	5.56327	1.3479	0.209396	4.89029	77.2893	0.0690083	50.9594	652.477
2337497	0	2.8	-7	65	17304113	1.5297	27	6.01762	123	36.1558	22.6013	44	-113	236	12.8057	48.1944	-1.55125	17304113	0.403914	1015.46	18.5822	11.4435	-1.8657	1.54198	0.365269	0.613831	0.350991	0.960434	0.237076	0.826842	0.825932	0.990189	0.950111	-0.241588	0.69158	0.338897	4.27643	0.232458	2.53461	0.715358	0.361053	8.55285	2.14472	0.476812	5.9506	337.115	0.0452504	37.2928	3009.16
2340341	0	2.1	48	105	19751170	1.10765	29	4.91917	221	73.7755	18.6306	70	-29	250	12.4723	77.7182	0.594635	19751170	0.593911	597.284	9.27205	3.02161	0.259089	0.72807	0.242494	0.497528	0.229152	0.797763	0.188244	0.887499	0.886758	0.993511	0.967495	-0.209734	0.57439	0.218879	3.02499	0.469408	1.83027	0.570287	0.671774	6.04998	1.57485	0.242641	5.14813	171.508	0.0524488	46.3754	1942.09
2343562	0	2.1	75	130	35422037	1.17983	27.25	3.88803	184	101.555	16.9287	102	12	172	11.559	103.92	-0.38056	35422037	0.478373	485.946	6.86715	1.92743	-0.383549	0.851492	0.290771	0.488882	0.287608	0.863616	0.20461	0.856723	0.856512	0.982952	0.942584	-0.18796	0.563346	0.284841	2.5936	0.303816	2.0378	0.588695	0.448166	5.1872	1.73706	0.285566	5.48416	153.997	0.0469503	37.4881	1569.06
2344319	0	1.6	-36	106	13189583	2.15802	60	3.39213	234	37.3561	40.383	37	-110	344	26.3132	65.0187	0.0977568	13189583	0.272448	2831.95	20.2334	46.4998	1.02071	3.79312	0.621832	0.716138	0.490486	1.22051	0.370297	0.775313	0.767853	0.990651	0.946928	-0.278794	0.813004	0.3879	4.40895	0.130726	3.60839	0.730697	0.267042	8.8179	2.92866	1.10374	6.39995	142.92	0.0458077	36.8768	850.038
2345542	0	5.4	37	73	217170764	1.05006	17	13.0795	181	54.716	12.2675	56	-112	293	7.45308	57.7533	-1.70558	217170764	0.555836	341.598	22.2198	2.90388	-0.772797	0.731427	0.26695	0.462377	0.26292	0.830293	0.194468	0.869204	0.868943	0.99467	0.967191	-0.172968	0.509985	0.25946	4.70145	0.389349	1.81139	0.608323	0.576618	9.4029	1.53703	0.249594	5.10589	4174.14	0.064109	43.4769	36190.5
2346863	0	3.9	40	84	121456744	1.03722	21	31.9083	154	61.4457	14.4904	61	-402	556	9.03758	64.9122	-1.78022	121456744	0.594602	438.018	117.284	6.80217	-0.815225	0.737675	0.214303	0.54784	0.197754	0.729641	0.173971	0.902937	0.902493	0.998753	0.985944	-0.251194	0.611662	0.190226	10.8237	0.470165	1.71191	0.60779	0.664586	21.6474	1.49547	0.237995	4.85568	2826.05	0.0980417	43.7412	17139.4
2353123	0	5.1	42	116	210350811	1.48074	38	4.68335	159	80.927	23.7204	85	-89	248	16.2869	86.5513	-0.947245	210350811	0.420744	941.953	17.8453	8.51161	-1.03015	1.47682	0.284987	0.675214	0.274675	0.865092	0.206642	0.864328	0.863694	0.992343	0.960942	-0.305856	0.750876	0.266152	4.18893	0.269054	2.40484	0.693782	0.441405	8.37786	2.09963	0.440451	5.81196	1408.44	0.0501581	41.3982	11814.5
2354804	0	1	6	48	107553	0.750312	25	3.03993	66	27.2772	14.4868	29	-28	94	10.3859	32.6325	-0.36147	537765	0.736496	320.834	4.16133	0.576312	-0.0306155	0.306111	0.22077	0.159554	0.22077	0.755001	0.170541	0.889615	0.889615	0.977923	0.944807	-0.0887272	0.325948	0.22077	2.03468	0.587656	1.32069	0.29739	0.756611	4.06936	1.09992	0.13172	3.00597	15.2178	0.150672	5.53338	74.3861
2356979	0	2.4	24	90	37619873	1.29744	33	34.169	522	64.5006	23.5097	66	-81	603	14.0935	76.3711	3.97607	37619873	0.520933	1672.21	15.3169	173.398	13.6095	2.22284	0.355342	0.722909	0.239055	0.843114	0.296057	0.892704	0.890425	0.997993	0.983412	-0.32183	0.724712	0.193211	3.85355	0.425435	2.01898	0.768221	0.62539	7.7071	1.7614	0.644544	4.99696	597.952	0.0927057	51.6383	3360.02
2358887	0	4.5	22	68	109080098	1.08455	19	5.55896	108	49.1707	13.9012	53	-117	225	8.68718	52.6102	-1.33804	109080098	0.511099	350.068	21.5873	1.9755	-0.660204	0.828882	0.224927	0.571672	0.222842	0.763954	0.173402	0.888919	0.888787	0.99393	0.968202	-0.248945	0.620067	0.221083	4.62993	0.369554	1.80225	0.574572	0.541745	9.25985	1.57207	0.263452	5.10697	2886.45	0.0732415	42.335	20142.4
2367485	0	2.6	29	76	27186931	1.01764	22	45.4359	117	54.5281	15.4794	59	-266	383	9.84574	59.517	-4.32569	27186931	0.559043	568.96	59.5047	16.2509	-2.04038	0.844628	0.248128	0.54027	0.210111	0.757764	0.202198	0.898776	0.898069	0.997088	0.979275	-0.2399	0.589999	0.195821	7.70425	0.431368	1.66984	0.665178	0.616047	15.4085	1.4451	0.273189	4.96629	631.133	0.0822324	46.0525	4290.66
2373966	0	8.1	41	106	759976544	1.33289	35	6.73098	290	73.4189	21.1121	74	-354	644	14.6045	78.4595	-0.381104	759976544	0.502718	765.558	100.152	6.6073	-0.14613	1.16445	0.274692	0.617033	0.257617	0.847507	0.205589	0.873738	0.872866	0.99861	0.982895	-0.274576	0.69932	0.245276	9.99648	0.348957	2.23605	0.638501	0.563066	19.993	1.9373	0.359786	5.43652	8402.21	0.0680589	43.2956	62063.1
2379113	1	8.1	34	65	476477060	1.09644	15	10.979	172	49.696	10.3755	50	-102	274	6.53685	51.9024	-1.08222	476477060	0.489908	224.173	20.6453	1.36352	-0.181713	0.767238	0.304157	0.431425	0.302635	0.8732	0.208245	0.84893	0.848835	0.993921	0.962192	-0.156619	0.500753	0.301365	4.53096	0.291275	1.96504	0.521069	0.38569	9.06191	1.65707	0.267849	5.47123	9307.63	0.0526227	37.5895	86652.4
2382057	0	0.8	-0.1	48.1	80504	0.87734	24.75	2.38804	58	28.8	14.9771	34.5	-14	72	11.1888	33.9125	-0.626899	402520	0.680408	320.617	4.09511	0.779768	-0.0567982	0.358782	0.22128	0.233888	0.22128	0.761367	0.172047	0.88936	0.88936	0.977872	0.94468	-0.0780024	0.32307	0.22128	2.01512	0.567533	1.42486	0.30886	0.744072	4.03023	1.20358	0.145015	3.24648	10.2857	0.146939	6.39265	47.6286
2383326	0	2.8	14	56	40813656	1.19744	17	80.0531	90	35.5209	16.0458	41	-566	656	7.89203	47.2127	-6.76181	40813656	0.542757	967.301	173.741	82.5822	-6.17213	1.3335	0.355927	0.572205	0.304163	0.925411	0.25958	0.853641	0.852404	0.99822	0.979915	-0.204704	0.590806	0.281521	13.1718	0.366697	2.04535	0.770034	0.563132	26.3436	1.72178	0.422357	5.41682	889.876	0.0486005	42.1541	9937.88
2384742	0	7.7	28	65	621251043	1.20593	17	168.928	134	45.418	13.3565	48	-787	921	7.50525	52.0757	-8.84237	621251043	0.473714	649.086	304.081	74.268	-4.20299	1.17525	0.29956	0.590727	0.271419	0.850847	0.22265	0.866807	0.866384	0.999181	0.986487	-0.238578	0.634884	0.262357	17.4316	0.297453	2.04421	0.762044	0.390801	34.8633	1.7639	0.368703	5.45164	14368	0.0627191	38.6999	108521
2396094	0	6.9	24	57	184665164	0.973106	16	65.8145	94	39.5382	11.5832	41	-472	566	6.95424	44.2395	-5.33239	184665164	0.600316	393.865	125.961	11.1078	-0.817925	0.729075	0.252168	0.482911	0.243488	0.808494	0.19038	0.879517	0.879105	0.998265	0.981316	-0.183988	0.517047	0.23751	11.2179	0.434501	1.69017	0.78877	0.62464	22.4359	1.44014	0.245311	4.94236	7108.63	0.0753392	42.8849	56642.8
2399146	0	4	28	67	53484010	1.20141	18	125.042	722	49.5305	13.9876	48	-61	783	7.76709	56.9856	7.92474	53484010	0.47873	794.085	12.729	129.07	8.76785	1.55149	0.438549	0.560141	0.33821	0.969104	0.318164	0.839676	0.838258	0.998534	0.981458	-0.18692	0.574664	0.307023	3.52855	0.277034	2.17449	0.70153	0.360077	7.05709	1.825	0.49751	5.5614	817.837	0.0496562	35.4638	7884.68
2405892	0	5.1	16	66	116468042	1.08789	25	12.8125	163	39.9153	16.0109	39	-284	447	10.6284	45.6291	-0.87154	116468042	0.548627	488.783	53.3368	3.92813	0.166415	0.79285	0.281875	0.474273	0.277562	0.850519	0.201344	0.861888	0.861648	0.997212	0.974799	-0.178794	0.535628	0.274237	7.29445	0.364119	1.92258	0.63615	0.550192	14.5889	1.63875	0.268681	5.29971	3000.54	0.0536385	41.068	30690.2
2407028	0	6.1	33	73	202285473	1.08457	20	33.5313	131	52.8374	13.7482	55	-294	425	8.47313	56.8613	-3.29211	202285473	0.522141	441.409	58.6086	7.41834	-1.23169	0.89464	0.224196	0.597213	0.210601	0.757718	0.178346	0.896555	0.896001	0.997288	0.979055	-0.27192	0.645659	0.202175	7.64467	0.381725	1.79081	0.648194	0.552791	15.2893	1.56588	0.279709	5.03925	5556.71	0.088815	41.7046	32667.7
2415117	0	0.9	1.2	29.2	11686	0.422001	13.5	2.82139	33	14.7429	8.72163	15	-12	45	5.75034	18.2725	-0.362891	58430	0.843265	116.534	3.78489	0.16549	-0.122176	0.116925	0.0941598	0.0751642	0.0941598	0.447989	0.0850376	0.95292	0.95292	0.981168	0.968613	-0.0650285	0.163328	0.0941598	1.94399	0.80942	0.596747	0.155605	0.896912	3.88798	0.502588	0.0527713	2.77775	5.68571	0.162449	5.04	29.5143
2415148	0	3	37	64	28703398	1.03533	13	27.3874	105	49.5853	8.87427	49	-133	238	5.78907	51.2691	-1.84462	28703398	0.498044	169.81	19.8708	1.54294	-0.0204556	0.753504	0.284852	0.450639	0.277881	0.852423	0.204366	0.861982	0.861741	0.992349	0.960415	-0.167484	0.513284	0.273936	4.4445	0.307574	1.86828	0.543495	0.412817	8.88899	1.58697	0.259589	5.44602	550.257	0.0503898	42.6758	5438.64
2415387	0	4.4	39	117	176362133	1.55059	40	4.37387	187	78.4831	25.0957	81	-85	272	16.7785	85.1046	-0.589713	176362133	0.418482	1083.2	17.2344	9.74056	-0.553256	1.60484	0.276429	0.704603	0.265125	0.855995	0.203876	0.869298	0.868568	0.992577	0.962326	-0.333079	0.784827	0.255456	4.11122	0.280315	2.47907	0.707366	0.478285	8.22244	2.18072	0.470317	5.77765	1420.99	0.058357	44.0591	10190
2416007	0	2.2	12	79	7945390	1.24995	34	4.2367	111	49.2861	21.2515	54	-96	207	14.6625	56.2627	-0.962388	7945390	0.469442	736.379	13.1674	3.68355	-1.05513	0.995408	0.293527	0.54056	0.277184	0.883544	0.21454	0.864123	0.863042	0.988842	0.954191	-0.205632	0.596061	0.26297	3.60436	0.337997	2.04843	0.550267	0.522121	7.20871	1.73371	0.322234	5.29052	137.13	0.0546334	51.0865	1178.3
2429211	0	4.6	18	68	67964510	1.27497	24	8.52907	139	43.0693	16.7963	46	-120	259	10.1729	49.3824	-1.53344	67964510	0.462091	583.666	19.4488	4.2449	-0.515564	0.98725	0.328312	0.497824	0.317608	0.91486	0.222441	0.842911	0.842267	0.991175	0.954815	-0.187011	0.573861	0.308899	4.39135	0.2763	2.1831	0.599911	0.393831	8.7827	1.83767	0.328891	5.65247	1334.93	0.0478986	37.5564	12878.5
2430048	0	3	58	155	177324794	1.71644	43	4.08629	223	109.622	29.0877	113	-78	301	18.8776	116.212	-0.552468	177324794	0.377561	1488.28	23.4451	15.2333	-1.31614	1.92449	0.379716	0.667269	0.335078	0.993923	0.263368	0.839375	0.83688	0.992534	0.958717	-0.282128	0.758798	0.300668	4.80191	0.246942	2.76945	0.67563	0.451914	9.60381	2.3389	0.57605	5.90635	606.019	0.0461553	48.3797	4957.37
2431964	0	2.8	18	69	26236104	1.27574	20	8.41551	126	46.4364	15.9088	50	-126	252	9.25809	51.927	-1.51119	26236104	0.456764	540.076	20.5086	3.7284	-0.663077	1.02953	0.271794	0.579809	0.265665	0.843852	0.198824	0.868155	0.86778	0.992682	0.962156	-0.243695	0.650895	0.260619	4.50767	0.29573	2.10015	0.602608	0.411937	9.01533	1.81848	0.325331	5.52504	520.866	0.053532	39.2381	4444.31
2432414	0	4.1	21	57	44885474	0.995928	17	9.80797	95	39.246	11.8572	41	-89	184	7.41786	42.7633	-1.77361	44885474	0.585115	288.45	10.5377	1.63346	0.0807211	0.602827	0.298775	0.335818	0.297776	0.867445	0.206219	0.851278	0.851212	0.982443	0.940478	-0.124296	0.426453	0.296903	3.23446	0.389395	1.79683	0.593219	0.577323	6.46891	1.49528	0.225401	5.21545	1162.59	0.0473658	39.5228	14361.6
2432700	0	2.4	11	50	6569046	0.679529	21	6.15036	132	32.404	12.5162	34	-24	156	8.5355	36.4107	0.400708	6569046	0.767706	275.719	4.42971	1.02509	0.351114	0.337818	0.15054	0.380826	0.149449	0.607972	0.12761	0.925457	0.925385	0.991164	0.970147	-0.145561	0.391243	0.148494	2.09353	0.656687	1.15606	0.473521	0.80422	4.18706	1.00215	0.122089	4.39784	457.033	0.0922368	44.0216	3803.98
2438874	0	7.5	31	62	399102088	1.07409	14	69.0586	185	45.7946	10.8477	46	-390	575	6.33871	49.2687	-4.25371	399102088	0.518583	330.261	87.799	8.02779	-0.348883	0.843867	0.268715	0.515673	0.257679	0.832007	0.199573	0.872651	0.872223	0.998153	0.980236	-0.204596	0.571315	0.251031	9.36243	0.34148	1.88279	0.665244	0.501925	18.7249	1.61187	0.278146	5.25089	10899.4	0.0662919	39.4706	85262.9
2442314	0	3.9	20	59	43718908	0.943598	19	20.562	127	38.6657	12.9319	39	-205	332	8.07922	43.1597	-2.15246	43718908	0.611041	367.721	38.7521	3.43733	0.0540797	0.691528	0.185133	0.576215	0.180022	0.684261	0.151508	0.910753	0.910498	0.997161	0.980052	-0.273996	0.615461	0.176363	6.21494	0.477921	1.56761	0.670166	0.663489	12.4299	1.38279	0.219165	4.77431	2448.3	0.104316	41.2549	14341.1
2443125	0	2.1	80	188	70526539	1.95791	52	19.4784	262	138.871	36.5818	148	-453	715	22.6283	148.806	-2.62911	70526539	0.32421	2858.11	181.091	120.059	-10.1016	3.15865	0.733684	0.617731	0.436636	1.20052	0.537598	0.810745	0.804398	0.997301	0.975147	-0.264965	0.773769	0.321665	13.4344	0.19661	3.14854	0.691805	0.367011	26.8688	2.56962	0.973082	6.10595	134.46	0.0422166	51.3453	1032.61
2444030	0	1.3	43	196.2	18262257	1.94856	39	9.94503	505	97.1336	50.817	73	10	495	22.4391	123.881	2.52607	18262257	0.398647	5911.5	8.82775	709.177	63.6833	9.6622	1.29596	0.765988	0.600356	1.48739	0.91288	0.780623	0.762682	0.99012	0.953961	-0.325746	0.846092	0.276925	2.59505	0.250619	3.4057	0.798247	0.479533	5.1901	2.7559	2.73954	5.96006	51.6118	0.0433712	51.4197	474.39
2449189	0	5.4	17	96	436013261	1.47072	47	113.495	1080	60.6768	27.4038	62	-104	1184	19.0138	75.3672	6.87461	436013261	0.433394	1998.54	23.1076	961.491	35.5592	2.95394	0.38253	0.770872	0.242061	0.835902	0.321633	0.889706	0.888111	0.999411	0.99086	-0.383151	0.811751	0.205091	4.73969	0.303967	2.33432	0.809188	0.458242	9.47938	2.05839	0.834116	5.38503	7193.46	0.0937137	44.4489	33267.3
2455532	0	4.4	23	71	117707730	1.30312	20	38.122	135	46.924	18.4665	53	-381	516	9.07249	57.741	-4.70756	117707730	0.476124	1132.16	91.4929	66.9832	-7.06211	1.64892	0.322902	0.667033	0.295336	0.91351	0.232657	0.856331	0.855055	0.99737	0.975558	-0.24992	0.66314	0.276602	9.54784	0.315083	2.14117	0.818661	0.484044	19.0957	1.83006	0.492956	5.52665	1761.99	0.0499078	42.8174	16809.6
2462664	0	1.8	40	91	6271305	0.861374	25	3.44449	108	67.2118	15.8159	70	-17	125	11.1147	70.1332	-0.678638	6271305	0.661687	401.249	8.50255	1.07884	-0.262	0.426814	0.170849	0.421517	0.170693	0.655999	0.140971	0.91468	0.914669	0.989953	0.965867	-0.169802	0.455052	0.170556	2.90487	0.58818	1.35898	0.428938	0.757949	5.80974	1.18785	0.149416	4.70557	82.6737	0.0648421	50.8263	843.651
2465194	0	3.5	5	58	38439239	1.08166	24	7.94006	100	32.6529	16.5651	35	-218	318	10.7859	39.6951	-1.11974	38439239	0.583377	509.491	37.9879	3.30033	-0.0368592	0.782691	0.204552	0.583815	0.200804	0.728281	0.163005	0.900203	0.899972	0.996859	0.97773	-0.273808	0.646005	0.197703	6.15169	0.447107	1.77178	0.633934	0.645022	12.3034	1.56241	0.246811	4.99594	2147.16	0.0880165	42.0322	14231.5
2466722	0	2.7	9	63	8700902	1.24378	25	7.54112	93	40.09	17.1453	45	-125	218	10.8855	46.3792	-1.54601	8700902	0.472547	543.819	19.0883	3.27097	-0.329071	0.941601	0.317948	0.490984	0.309295	0.908914	0.219589	0.84676	0.846218	0.987845	0.948654	-0.179401	0.566847	0.302048	4.3511	0.285628	2.13393	0.548682	0.426254	8.70221	1.81116	0.314887	5.56933	188.067	0.0464938	37.0546	1911.45
2473903	0	2.5	9	64	26284410	1.23048	22	46.728	498	38.5455	18.792	38	-243	741	10.0208	51.9614	2.82775	26284410	0.566113	1214.24	39.2404	118.6	7.72796	1.73282	0.334684	0.674429	0.241639	0.848884	0.274644	0.889146	0.887067	0.998559	0.985202	-0.29542	0.697613	0.202762	6.23625	0.43693	1.9911	0.783973	0.638835	12.4725	1.72367	0.516876	5.1847	718.476	0.0738034	49.0446	5511.11
2478153	0	5.2	25	137	401906212	1.90101	54	4.92339	328	76.6611	34.1255	74	-325	653	22.9235	88.8245	0.405944	401906212	0.325765	2012.87	82.876	37.4938	3.31419	3.08299	0.325017	0.809053	0.285942	0.920908	0.240515	0.862754	0.860838	0.99836	0.981095	-0.4171	0.884498	0.258506	9.06567	0.203357	2.96346	0.840592	0.37301	18.1313	2.60097	0.852002	6.12037	3263.59	0.0640674	45.6093	16594.5
2478211	0	1.8	-7	73	8861391	1.6213	24	16.2209	105	37.4524	29.2879	50	-294	399	12.4804	61.9363	-3.23992	8861391	0.405781	2433.42	55.2115	115.496	-13.5339	2.93456	0.481407	0.707303	0.373995	1.07578	0.333666	0.828036	0.823556	0.994281	0.963522	-0.290828	0.745988	0.305785	7.38894	0.263046	2.54723	0.753404	0.430609	14.7779	2.16646	0.853992	5.74289	95.0017	0.0411263	49.4183	937.353
2480302	0	3	28	63	44045810	1.14118	16	8.62088	128	47.0908	11.8472	50	-71	199	6.96467	50.0758	-1.669	44045810	0.480038	290.046	12.5996	1.48388	-0.301071	0.773266	0.336654	0.391592	0.332086	0.91647	0.221536	0.834705	0.834414	0.98709	0.94476	-0.127215	0.455117	0.328215	3.53417	0.281319	2.03612	0.43269	0.388573	7.06835	1.6888	0.27748	5.49082	835.024	0.0475391	34.7149	8431.87
2481220	0	4	27	71	49494729	1.11799	22	5.23873	127	49.9782	14.0849	52	-154	281	9.17508	53.3801	-0.636714	49494729	0.489095	351.619	31.2348	1.53014	-0.317442	0.876851	0.2064	0.618165	0.20512	0.728347	0.162809	0.897623	0.897564	0.995877	0.974377	-0.295153	0.677122	0.204259	5.57378	0.344954	1.84088	0.622389	0.475817	11.1476	1.63237	0.270813	5.20519	1270.81	0.0731611	38.9671	8495.58
2482765	0	3.6	24	74	28430480	1.31443	22	17.9028	365	52.2325	16.8921	54	-86	451	9.66835	58.3686	1.18071	28430480	0.468103	678.657	13.614	13.4037	0.802045	1.18968	0.329351	0.564615	0.298132	0.914413	0.237654	0.854858	0.853843	0.996779	0.973113	-0.224853	0.64119	0.281408	3.66041	0.308653	2.21845	0.610214	0.483238	7.32081	1.90167	0.379757	5.50814	398.81	0.0477903	42.7256	3906.32
2484231	0	1.8	2	46.6	2461018	0.706319	23	7.0842	60	26.3245	14.1744	30	-129	189	9.7518	32.1228	-1.32538	2461018	0.763947	338.893	16.036	0.910699	-0.0819448	0.310166	0.156171	0.324859	0.150616	0.620097	0.13293	0.925588	0.925247	0.994042	0.975027	-0.12761	0.362977	0.146033	3.99968	0.670852	1.16966	0.38623	0.815134	7.99935	1.00795	0.116584	4.45999	196.063	0.0822068	47.8485	1822.01
2493130	0	4.8	49	108	374644394	1.23584	29	10.3089	175	76.9829	20.1508	79	-205	380	12.584	82.2941	-1.55959	374644394	0.557846	845.941	50.1622	11.1261	-1.15907	1.10052	0.250411	0.626596	0.233078	0.80851	0.194208	0.886047	0.885174	0.996968	0.976844	-0.271503	0.673904	0.220627	7.06751	0.421643	2.02647	0.682857	0.630285	14.135	1.75965	0.337733	5.1221	4716.62	0.0852606	47.0604	30860
2494948	0	4.8	28	75	72230661	1.10921	22	19.8109	108	53.1551	16.8624	59	-230	338	9.31286	59.6356	-3.22483	72230661	0.559063	730.939	45.0983	13.221	-2.55454	1.03672	0.229309	0.630599	0.214105	0.771645	0.182165	0.895314	0.894464	0.996498	0.976375	-0.272063	0.637944	0.202359	6.70046	0.451417	1.73014	0.704203	0.643841	13.4009	1.50691	0.316507	4.81203	1955.85	0.0962999	48.9823	11354.6
2500846	0	10.4	35	90	1571501145	1.09479	27	6.96977	267	63.6742	17.0979	64	-303	570	11.6101	67.5123	-0.286645	1571501145	0.563246	503.507	77.7283	4.31424	-0.521133	0.885643	0.172768	0.673224	0.16895	0.656443	0.142887	0.916087	0.915897	0.998985	0.98795	-0.3577	0.724434	0.166241	8.80625	0.442338	1.77019	0.690076	0.634751	17.6125	1.59082	0.264603	4.59331	55686.1	0.16151	37.5554	194199
2506002	0	0.9	15.9	56.1	181727	1.02199	19	3.96503	69	39.45	12.458	44	-9	78	8.11187	42.6294	-1.00648	908635	0.5638	260.967	5.2688	0.973698	0.191271	0.604658	0.344971	0.273576	0.344971	0.926565	0.22505	0.827515	0.827515	0.965503	0.913757	-0.0719731	0.357885	0.344971	2.28118	0.332435	1.92525	0.370217	0.510958	4.56237	1.58028	0.237407	3.75286	14.06	0.1406	3.9884	56.38
2510973	0	5.1	27	73	247586298	1.07664	24	4.4066	112	50.8465	14.7159	52	-87	199	10.1352	54.2453	-0.632218	247586298	0.49733	357.181	12.8879	1.26192	-0.296819	0.819039	0.225108	0.568149	0.223795	0.761515	0.172791	0.888321	0.888234	0.991352	0.962732	-0.252993	0.625745	0.222649	3.56923	0.33684	1.8262	0.570777	0.465052	7.13846	1.59655	0.261037	5.11272	7518.64	0.0893587	40.6118	41845.3
2511135	0	2.5	24	53	21069628	0.702699	14	3.97932	94	39.2833	9.04518	40	-19	113	6.22437	40.9902	-0.376325	21069628	0.702984	137.02	4.79526	0.618416	0.348304	0.389566	0.212933	0.293489	0.212809	0.735068	0.165261	0.893616	0.893608	0.978712	0.946804	-0.10081	0.314331	0.2127	2.1797	0.535423	1.32875	0.343099	0.710738	4.3594	1.11521	0.150625	4.68298	878.282	0.0700384	43.453	8815.42
2513143	0	6.2	48	92	494412841	0.98218	21	48.3464	628	68.2818	15.5245	67	-345	973	9.01863	72.8521	0.874775	494412841	0.671576	645.017	80.3332	25.2008	0.979271	0.809431	0.241581	0.53797	0.199228	0.748602	0.200503	0.905058	0.903901	0.999405	0.990596	-0.226088	0.570342	0.179747	8.95496	0.550529	1.6456	0.633649	0.733875	17.9099	1.41107	0.262753	4.41232	13298.8	0.142759	46.2081	62560.7
2523024	0	3.6	37	68	51101661	1.04264	14	9.1314	164	52.3857	10.2184	53	-60	224	6.40997	54.4044	-0.681901	51101661	0.519708	215.58	13.2855	1.14758	-0.305739	0.676414	0.311276	0.368202	0.310162	0.879735	0.210169	0.845104	0.84503	0.991592	0.955711	-0.12554	0.43008	0.309188	3.63239	0.323044	1.88432	0.550157	0.47857	7.26478	1.57136	0.246923	5.36456	826.918	0.0478956	36.3741	8972.77
2523576	0	3.3	3	53	32544918	1.07377	22	6.96833	87	30.5772	16.0361	35	-112	199	9.37036	38.1851	-1.63273	32544918	0.606775	523.138	16.869	3.14196	-0.185085	0.711335	0.219864	0.524127	0.211121	0.758082	0.173802	0.895861	0.895314	0.991618	0.965019	-0.228373	0.585482	0.203808	4.09219	0.482785	1.73627	0.618142	0.679344	8.18438	1.50015	0.2328	4.82233	2338.24	0.10476	49.3123	13543.2
2523778	0	4.7	7	91	410451013	1.58023	26	44.0405	149	47.5651	38.5211	65	-873	1022	12.2246	97.672	-5.76165	410451013	0.517241	7277.39	382.743	5553.52	-218.959	11.6212	0.686378	0.888781	0.314714	1.00089	0.582552	0.875837	0.870768	0.998513	0.98634	-0.400206	0.840212	0.198674	19.4938	0.40655	2.51479	0.899539	0.624816	38.9877	2.15589	3.07689	5.28466	4345.79	0.101006	52.4696	22254.3
3060760	0	6.2	67	119	535854245	1.08454	27	5.66896	177	89.4306	16.6155	87	-191	368	11.4542	92.0435	-0.350686	535854245	0.542008	474.179	39.7067	2.50218	0.332891	0.921317	0.119413	0.770273	0.116122	0.52108	0.105464	0.94244	0.942263	0.998169	0.987133	-0.489856	0.801081	0.113656	6.28539	0.449837	1.60238	0.787377	0.615359	12.5708	1.47718	0.260182	4.18909	15838.1	0.250405	35.9638	34282
3109693	0	4.2	7	92	135980612	1.65607	43	4.56779	174	48.9566	27.6075	51	-121	295	18.2121	61.0829	-0.713202	135980612	0.378782	1334.37	20.8298	15.2282	-1.29882	1.92434	0.286993	0.73913	0.276093	0.867873	0.207788	0.863716	0.863044	0.994287	0.965638	-0.356311	0.814851	0.267069	4.51889	0.241088	2.61272	0.759128	0.354405	9.03777	2.30413	0.552834	5.94697	1994.73	0.0547326	42.9674	13804.7
3797401	0	2.8	2	70	32683960	1.57551	26	20.6423	148	40.2828	23.5857	48	-464	612	11.8345	55.5021	-3.05491	32683960	0.404305	1457.79	130.717	42.7637	-4.87918	1.91446	0.393763	0.653212	0.316691	0.985822	0.290648	0.85161	0.84887	0.99772	0.977721	-0.278665	0.7357	0.273119	11.4165	0.25863	2.51605	0.704253	0.377751	22.8329	2.13742	0.577057	5.83977	516.352	0.0486665	48.4095	4289.68
3799399	0	1.5	-110.2	83	9473616	2.40925	72.25	5.58751	110	2.59552	58.9915	20	-344	454	33.2032	84.0825	-1.64885	9473616	0.251958	7063.13	62.007	384.721	-38.1397	8.3461	1.06637	0.75774	0.623252	1.41253	0.615014	0.750261	0.732313	0.989854	0.946526	-0.387994	0.893318	0.345913	7.75745	0.133712	3.676	0.798644	0.255656	15.5149	3.07283	2.35312	6.35426	61.794	0.0461149	41.7811	337.624
4295970	0	1.8	69	141	49819192	1.39027	34	4.13617	200	108.413	22.3581	112	-29	229	14.541	112.376	-0.486194	49819192	0.462575	875.021	14.4435	5.89719	-0.675849	1.23045	0.268953	0.638279	0.25607	0.83873	0.200394	0.874028	0.873253	0.99279	0.963645	-0.292281	0.717749	0.245595	3.76867	0.332904	2.24718	0.648517	0.535209	7.53734	1.96173	0.374851	5.50723	219.511	0.0556428	44.8117	1824.86
4515504	0	1.3	-32	59	2394291	1.70667	51	3.11026	82	23.0471	30.1469	36	-93	175	21.5013	43.3345	-0.961372	2394291	0.345206	1346.71	9.75837	12.0404	-1.67439	1.94383	0.372549	0.673106	0.359991	0.962518	0.237808	0.822097	0.82126	0.978307	0.92842	-0.282723	0.756401	0.349003	3.06019	0.20215	2.73156	0.696748	0.361275	6.12037	2.34873	0.579096	5.77369	64.9969	0.0509779	29.8813	440.137
5095341	0	5.7	52	95	226714445	0.769421	23	5.33263	198	73.5982	14.0773	74	-40	238	9.52164	75.8803	0.0414689	226714445	0.738468	341.125	9.026	1.67713	-0.0104908	0.445514	0.141157	0.517565	0.138166	0.582191	0.121358	0.931409	0.931216	0.994596	0.977043	-0.246335	0.539586	0.135609	2.99164	0.638576	1.29288	0.536159	0.794624	5.98328	1.14369	0.146668	4.08226	6756.57	0.171596	38.9472	29077.2
5176891	0	1.1	-78	75.1	5307657	2.16046	70	5.34301	103	14.8933	49.4366	35	-270	373	31.4233	66.7848	-1.51925	5307657	0.276568	4238.41	48.3704	134.673	-16.1514	5.25186	0.791983	0.723058	0.559795	1.248	0.415467	0.755426	0.743243	0.990606	0.946069	-0.375802	0.859321	0.387943	6.87409	0.148674	3.3367	0.755372	0.254546	13.7482	2.80153	1.51096	5.77474	76.7983	0.0645364	30.3306	329.116
5426043	0	2.9	15	53	110583340	0.837015	20	7.65742	100	34.8788	12.4044	37	-165	265	8.15353	38.6636	-1.18826	110583340	0.677516	278.341	26.5588	1.20625	0.182382	0.463506	0.223388	0.34829	0.222094	0.756686	0.171558	0.889168	0.889082	0.995535	0.972256	-0.136168	0.407964	0.22097	5.14769	0.51645	1.49627	0.592587	0.699532	10.2954	1.26956	0.171723	4.67628	5664	0.0765664	42.9392	50119.2
5465254	0	1.6	68	115	18850134	1.11451	24	3.27662	139	93.2911	14.4938	95	27	112	10.1453	95.0833	-0.579899	18850134	0.491622	337.597	6.09647	1.24152	-0.0235545	0.810061	0.286022	0.477313	0.278347	0.862726	0.205089	0.862106	0.861594	0.971752	0.930797	-0.183695	0.549843	0.27163	2.44237	0.298457	1.97252	0.482001	0.394663	4.88474	1.66915	0.274021	5.46243	103.585	0.0496811	35.8906	1025.03
5513783	0	5.8	23	59	150406523	1.049	17	50.918	123	39.005	13.3842	41	-337	460	7.40685	46.2646	-5.25093	150406523	0.576523	619.017	67.8686	20.7304	-1.90441	0.965689	0.24567	0.588422	0.225965	0.791769	0.192637	0.889842	0.888964	0.997585	0.9796	-0.25012	0.613807	0.212902	8.2273	0.422974	1.7523	0.74103	0.612457	16.4546	1.52182	0.30284	4.89837	6889.95	0.0980497	43.0808	40512.3
5609634	0	3.3	22	65	32610484	1.18739	20	13.1155	117	45.3294	14.1166	48	-169	286	8.82664	49.6195	-1.94766	32610484	0.472385	407.343	30.2524	3.0662	-0.44771	0.912628	0.285402	0.521894	0.275741	0.864253	0.207066	0.863572	0.86309	0.994322	0.965661	-0.202659	0.591028	0.268829	5.48592	0.295087	2.03171	0.547027	0.377317	10.9718	1.74121	0.299507	5.5023	663.411	0.0500877	41.3501	6256.74
6003896	0	3.5	37	98	140732363	1.1705	34	3.0766	161	69.0822	19.4745	72	-46	207	14.2909	73.13	-0.243855	140732363	0.539137	575.646	8.49828	3.38347	-0.194034	0.967225	0.169568	0.701341	0.167854	0.651533	0.140254	0.916354	0.916244	0.993492	0.972065	-0.38688	0.760243	0.166401	2.88077	0.427853	1.84744	0.721244	0.627563	5.76153	1.67176	0.284198	4.9214	3376.57	0.128313	42.9135	14187.4
6608430	0	2.2	30	76	13624212	1.01678	22	3.95853	113	54.7441	14.5725	57	-33	146	9.36885	58.0359	-0.631547	13624212	0.548145	371.242	7.46687	1.27732	-0.534985	0.692755	0.20003	0.549385	0.198898	0.718077	0.159337	0.90074	0.900664	0.988254	0.960258	-0.241079	0.591823	0.197907	2.7099	0.428066	1.64586	0.554226	0.611813	5.4198	1.44263	0.223196	5.01219	287.527	0.071082	44.6633	2217.24
6863098	1	13.4	18	81	3116189335	1.24559	32	8.84883	343	45.4682	20.3461	41	-400	743	13.4754	53.2539	1.232	3116189335	0.496696	768.625	88.765	10.8975	1.90114	1.32089	0.198591	0.738385	0.188533	0.711114	0.161587	0.907276	0.90673	0.999123	0.988253	-0.390439	0.77778	0.18093	9.40662	0.379037	1.96744	0.757072	0.560884	18.8132	1.75752	0.379871	4.52717	215017	0.195683	41.0681	545772
7072737	0	4.2	33	69	110964619	1.08973	17	6.92545	125	50.7285	11.7119	51	-113	238	7.17222	53.3101	-0.324942	110964619	0.491812	268.585	20.7657	1.24479	-0.117605	0.770069	0.294266	0.446357	0.293299	0.860336	0.20407	0.85351	0.853447	0.992051	0.958117	-0.163965	0.512932	0.292468	4.54387	0.29515	1.95719	0.607431	0.393457	9.08774	1.66017	0.266084	5.46554	2018.75	0.0517031	35.2394	19202.8
7080972	0	5.4	33	82	246005408	0.964025	21	59.1573	143	60.4019	15.9887	64	-548	691	9.10837	65.4262	-4.28306	246005408	0.641352	632.193	164.345	25.2789	-2.75431	0.882352	0.171117	0.672575	0.136869	0.585302	0.151865	0.934549	0.934001	0.999165	0.990992	-0.372756	0.693291	0.125822	12.8128	0.57148	1.45833	0.748619	0.743854	25.6256	1.3084	0.263367	3.98536	13083.9	0.227665	38.7103	36858.5
7093201	0	3.2	26	77	51933095	1.2871	25	28.5013	159	51.4327	18.6574	56	-299	458	10.4486	59.9291	-3.63273	51933095	0.492307	946.177	58.5333	31.948	-3.94788	1.3821	0.278322	0.659652	0.24473	0.844223	0.216864	0.882409	0.880947	0.997275	0.977994	-0.287052	0.698482	0.222797	7.63263	0.358467	2.07188	0.728639	0.54427	15.2653	1.79911	0.415106	5.33199	1032.47	0.071402	47.8162	7118.76
7372983	0	0.6	-26.6	60	906687	1.6512	47	3.47169	83	18.2835	28.004	24	-105	188	19.5027	39.7095	-0.772932	906687	0.373592	1242.56	16.0684	10.7458	-1.50691	1.76486	0.466809	0.578129	0.420664	1.04825	0.274075	0.797305	0.794282	0.98242	0.930984	-0.223915	0.668378	0.380798	3.96775	0.202111	2.80795	0.625329	0.375298	7.93549	2.30738	0.557918	5.73098	31.9217	0.0555161	27.3541	214.816
7387837	0	4.5	62	619	4961694926	3.99742	300	3.43829	1177	280.759	181.859	215	-130	1307	126.924	360.399	0.96256	4961694926	0.0800316	51061.4	105.312	19176.6	615.509	76.5056	5.21933	0.872185	1.51724	2.34614	2.81013	0.562273	0.513854	0.993152	0.94987	-0.295416	0.943088	0.400767	9.35339	0.0201769	6.79417	0.881346	0.0699034	18.7068	4.93038	20.4312	7.77087	2578.12	0.0674899	29.0833	3057.21
7401559	0	5.5	19	51	76346558	0.709056	15	21.904	115	35.8539	10.5156	37	-240	355	6.60378	38.9593	-2.03055	76346558	0.739267	232.321	37.4391	1.46849	0.156106	0.374059	0.175145	0.359988	0.171476	0.662929	0.144612	0.914806	0.914624	0.997313	0.980986	-0.139372	0.386501	0.168868	6.11469	0.612515	1.24314	0.510261	0.772653	12.2294	1.06523	0.137301	4.28955	5647.01	0.112267	42.7902	37185.2
7417686	0	3.9	29	72	120541280	1.2045	22	71.5273	152	49.4613	15.7277	52	-524	676	9.33441	56.9739	-5.93133	120541280	0.481515	799.612	157.703	37.6543	-3.37797	1.14917	0.358197	0.519125	0.312158	0.934003	0.257051	0.849219	0.848012	0.998432	0.980644	-0.181231	0.56115	0.290753	12.5501	0.292944	2.10001	0.651506	0.417933	25.1002	1.7652	0.376842	5.56253	1839.53	0.0495364	40.9386	17881.1
7485782	0	3.6	35	62	61112712	1.07361	14	76.8038	118	48.2404	9.56502	49	-331	449	5.84071	50.5405	-4.65358	61112712	0.491844	227.207	72.1963	2.63378	-0.247222	0.722183	0.354611	0.34013	0.34274	0.929156	0.232043	0.830016	0.829679	0.996508	0.968921	-0.105824	0.403805	0.336987	8.49143	0.278001	1.97875	0.480998	0.332889	16.9829	1.62583	0.269198	5.49899	1175.48	0.0491319	32.4468	11767.4
7650443	0	3.6	84	196	638814859	2.03987	47	5.88112	367	143.297	35.8242	146	-122	489	20.5581	152.357	-0.525721	638814859	0.315419	2678.6	42.2954	73.2001	-1.45053	3.52682	0.478737	0.758697	0.393076	1.09601	0.318572	0.815916	0.811868	0.996129	0.967771	-0.324581	0.83613	0.334213	6.44461	0.178141	3.25721	0.789517	0.290503	12.8892	2.73746	1.00139	6.39984	1197.79	0.0435242	43.1665	8680.33
7661963	0	3.7	44	80	123841879	0.862544	17	115.337	172	60.135	14.6645	63	-650	822	7.41448	68.7189	-8.42886	123841879	0.709696	1106.06	220.7	110.531	-7.84512	1.04876	0.266361	0.578707	0.168672	0.675556	0.237289	0.92459	0.923063	0.999122	0.990874	-0.237404	0.538655	0.136333	14.8494	0.633142	1.33015	0.65315	0.789127	29.6988	1.14152	0.328779	3.98587	5277.01	0.201221	49.6839	18611.8
7666848	0	1.3	5.9	170.1	24387363	2.64331	62.5	11.3621	747	82.0363	70.4357	59	-281	1028	27.4001	146.907	2.3296	24387363	0.249449	14851.8	74.1317	4411.05	225.914	21.3241	4.24629	0.66821	1.11387	2.01171	2.91323	0.679671	0.65202	0.991184	0.95457	-0.266579	0.850695	0.351154	8.35787	0.106979	4.55514	0.742184	0.217309	16.7157	3.45132	6.39259	6.37976	56.5327	0.050029	34.7598	281.878
7853023	0	2.6	16	58	7969707	0.954803	19	4.00201	96	39.5257	12.8815	42	-42	138	8.60638	42.9516	-0.568813	7969707	0.580453	282.559	5.30226	1.11073	0.365069	0.667512	0.218391	0.506704	0.218138	0.747546	0.168629	0.890973	0.890956	0.978173	0.945478	-0.213206	0.55719	0.217917	2.27815	0.408394	1.68752	0.507383	0.592187	4.55629	1.46807	0.221476	5.15655	260.741	0.0603567	36.4199	2507.56
7869295	0	8.5	15	78	488707549	1.3721	36	6.23979	279	47.1203	21.7057	51	-114	393	14.6453	55.2694	-0.651522	488707549	0.44308	834.386	20.6602	8.2619	-0.840992	1.34626	0.19532	0.745488	0.190576	0.709143	0.15777	0.905489	0.905186	0.997622	0.980985	-0.405519	0.804241	0.186551	4.51359	0.324395	2.09404	0.762163	0.436584	9.02718	1.88886	0.385395	5.08126	21700.2	0.135639	42.8766	70886.1
7876164	0	7.2	45	102	878768698	1.20057	27	25.6684	233	70.952	19.2659	71	-574	807	11.672	76.6262	-1.99673	878768698	0.585168	837.382	195.275	19.3874	-1.40756	1.07895	0.223215	0.654347	0.197862	0.74366	0.182794	0.904432	0.903442	0.999235	0.989078	-0.319769	0.710221	0.182696	13.9664	0.471838	1.91032	0.760495	0.674937	27.9328	1.6731	0.32554	4.74595	20933.6	0.13987	45.2462	87579.2
7878136	0	5	17	118	169757135	1.74148	60	2.72931	212	62.5404	32.7522	56	-72	284	24.2121	74.054	0.461769	169757135	0.336998	1572.69	14.7557	15.906	2.0643	2.5018	0.283033	0.796546	0.271903	0.86466	0.206573	0.865869	0.865161	0.994366	0.966166	-0.404164	0.860918	0.262485	3.76841	0.211592	2.73248	0.801789	0.349398	7.53683	2.42311	0.696208	5.92913	1809.81	0.0584659	41.5833	10431.8
7883469	0	1.5	37	73	4293600	0.890567	17	4.79821	111	56.2327	11.9421	59	-6	117	7.57425	58.491	-0.840989	4293600	0.605646	259.082	7.82658	0.995819	-0.492642	0.51867	0.198038	0.441151	0.196954	0.711123	0.157514	0.901704	0.901632	0.98837	0.960645	-0.176664	0.470158	0.196005	2.78317	0.503873	1.44445	0.456843	0.685556	5.56635	1.24448	0.179177	4.78637	86.2367	0.0687145	49.2625	760.085
7883647	0	2.2	-5	50	8170729	1.01832	26	4.41256	81	25.6579	17.0288	30	-84	165	11.3699	33.9355	-1.03853	8170729	0.628121	493.289	9.17486	2.59259	-0.270413	0.665077	0.200205	0.534829	0.199038	0.714966	0.158791	0.900676	0.900598	0.988244	0.960231	-0.247879	0.598429	0.198016	3.00974	0.503906	1.67847	0.62701	0.698095	6.01948	1.4744	0.216321	4.94484	514.386	0.0724998	43.8137	4456.52
7885168	0	2.7	39	129	55149509	1.70915	40	12.613	181	84.7001	28.9645	89	-428	609	17.3262	94.6579	-1.92618	55149509	0.383232	1786.01	127.326	44.647	-4.39851	2.28324	0.370597	0.71724	0.307894	0.967311	0.271879	0.854676	0.851948	0.997848	0.978289	-0.329748	0.798583	0.267693	11.2627	0.251298	2.70136	0.756246	0.414275	22.5254	2.31783	0.663458	5.92013	313.141	0.0508759	48.7319	2358.79
7892135	0	3.4	6	60	26291041	1.15272	28	4.02293	119	34.7345	17.2805	38	-69	188	11.9	41.2248	-0.649109	26291041	0.532369	492.999	10.557	2.48081	0.080328	0.853233	0.246954	0.550071	0.246345	0.800357	0.184424	0.876929	0.876888	0.990507	0.958957	-0.237572	0.62959	0.245812	3.22573	0.364104	1.96335	0.601157	0.558321	6.45145	1.71413	0.275047	5.36421	890.274	0.0575484	37.9455	8235.75
7893717	1	5.1	7	104	369895258	1.88327	49	14.462	217	51.4302	32.7027	52	-534	751	20.841	68.9546	-1.61451	369895258	0.330869	2109.68	159.054	83.3769	-4.67091	2.87764	0.354897	0.778553	0.292013	0.94434	0.266968	0.862473	0.859955	0.998631	0.983018	-0.393836	0.865513	0.253623	12.5866	0.212659	2.89989	0.817871	0.317583	25.1733	2.51993	0.808135	6.00311	5541.96	0.071238	49.3415	25740
7907825	0	3.5	25	63	46144110	1.1748	18	9.53635	116	44.7405	12.9084	47	-100	216	7.75105	48.5149	-1.71546	46144110	0.477963	351.976	11.8131	2.26921	-0.220153	0.850401	0.319249	0.452585	0.314655	0.89906	0.216089	0.843423	0.843132	0.98776	0.947666	-0.162528	0.527106	0.310779	3.41764	0.281425	2.07596	0.547179	0.388105	6.83529	1.74713	0.292412	5.61564	929.31	0.0474017	40.205	9370.47
7920366	0	9.6	22	61	469567584	1.14257	19	35.9286	137	41.6053	13.7786	44	-331	468	8.25619	46.9151	-3.72561	469567584	0.507764	470.029	69.5407	10.3276	-0.981601	0.90018	0.313918	0.480621	0.305811	0.891629	0.215582	0.848334	0.847903	0.996898	0.972259	-0.175508	0.536072	0.299759	8.33031	0.314421	2.00426	0.739024	0.472389	16.6606	1.68958	0.303524	5.43029	11182.6	0.0524167	37.3593	108326
7921237	0	3.3	41	91	46933836	0.834726	23	3.31872	126	66.5914	14.8923	68	-11	137	10.3158	69.2745	-0.432225	46933836	0.676821	364.545	8.45847	1.34141	-0.369343	0.488011	0.133406	0.567692	0.133406	0.562941	0.115064	0.933297	0.933297	0.992153	0.973319	-0.285065	0.585073	0.133406	2.89305	0.604192	1.3069	0.591335	0.768641	5.7861	1.17349	0.155354	4.23263	1526.15	0.156048	42.3105	6619.31
7921287	0	1.7	48	281	244531287	2.57209	87	5.38079	533	130.38	73.4224	94	-45	578	42.285	163.791	1.65119	244531287	0.248285	9828.42	21.78	1220.29	97.1499	15.8327	0.894166	0.893538	0.569871	1.39424	0.551415	0.760065	0.7467	0.993993	0.957859	-0.388902	0.923988	0.366002	4.24783	0.135729	4.16995	0.901028	0.328945	8.49567	3.42064	4.18171	6.71515	398.86	0.0437587	48.5002	2263.12
7924550	0	6.5	35	69	304091226	1.07897	17	25.6371	159	51.9723	11.7178	53	-464	623	7.13015	54.7638	-2.11411	304091226	0.515705	297.955	135.33	2.29234	-0.533334	0.74925	0.295493	0.432495	0.290503	0.866692	0.207212	0.855422	0.855206	0.998502	0.980653	-0.15491	0.493091	0.287345	11.6283	0.330605	1.91024	0.497172	0.49356	23.2565	1.6094	0.261186	5.31478	5353.21	0.0527956	37.6724	52289.9
7933133	0	2.1	29	65	14130723	1.09746	17	14.2394	108	46.6349	11.9405	47	-141	249	7.52782	49.6815	-1.64756	14130723	0.493877	293.431	19.69	1.49762	-0.0098775	0.758949	0.306005	0.424173	0.302478	0.879942	0.210419	0.849305	0.849114	0.991747	0.95685	-0.14935	0.489828	0.299802	4.42456	0.296546	1.95475	0.490032	0.410399	8.84912	1.64832	0.266238	5.53851	264.386	0.0461809	36.8677	2827.44
7935032	0	1.6	30	67	5895725	1.03291	17	4.88704	86	50.0125	11.4207	52	-23	109	7.369	52.3052	-1.06303	5895725	0.512525	234.582	7.03814	0.965878	-0.351642	0.674001	0.289642	0.396088	0.288762	0.858097	0.202952	0.855765	0.855707	0.971076	0.927853	-0.132558	0.447942	0.287993	2.63475	0.336704	1.82535	0.399108	0.498844	5.2695	1.5333	0.240911	5.24444	106.106	0.0492372	39.5333	1104.49
7936723	0	2.5	5	67	14941047	1.30709	31	4.05008	104	39.5563	19.2906	44	-90	194	13.4406	46.5842	-0.866399	14941047	0.446992	605.387	11.604	3.41546	-0.490691	1.05893	0.33361	0.51951	0.330242	0.916849	0.221224	0.83544	0.835216	0.987196	0.94504	-0.188861	0.59926	0.327295	3.37971	0.253617	2.28073	0.561665	0.355846	6.75942	1.93724	0.348134	5.69354	321.537	0.0467011	34.5693	3077.54
7936772	0	2.2	32	72	22871479	1.03328	18	5.94385	111	52.5356	12.4562	54	-88	199	8.02449	55.1674	-0.732523	22871479	0.519375	283.455	13.2795	1.09938	-0.3598	0.70939	0.272961	0.443121	0.271395	0.838172	0.196431	0.864563	0.864459	0.989514	0.954805	-0.159562	0.49872	0.270025	3.6291	0.337788	1.83927	0.460773	0.497591	7.2582	1.5614	0.245588	5.36018	368.825	0.0490785	37.6258	3903.1
7948066	0	8.4	-6	64	340524801	1.51202	37	7.79198	133	32.6103	24.7451	41	-400	533	15.5878	46.5261	-1.59094	340524801	0.415085	1101.24	85.7436	17.1352	-2.37058	1.72941	0.231578	0.762329	0.22561	0.777316	0.179079	0.888069	0.887773	0.998106	0.981236	-0.397242	0.820049	0.221396	9.23953	0.290134	2.30693	0.817827	0.444683	18.4791	2.06948	0.490248	5.43984	15305.2	0.0972933	41.4154	65297.1
7954503	0	2.5	20	74	36607127	1.07453	25	4.08095	106	52.0122	16.7455	58	-52	158	11.0289	56.3222	-1.12379	36607127	0.531365	466.924	13.7116	2.60288	-0.940067	0.835461	0.19944	0.611816	0.195978	0.718274	0.159841	0.902584	0.902357	0.992357	0.967419	-0.280866	0.64293	0.192984	3.68134	0.427718	1.69918	0.618357	0.615281	7.36269	1.49192	0.258725	4.75977	1239.87	0.107441	47.0735	6131.96
7958872	0	7.3	13	119	666296061	1.74751	64	3.04227	229	56.597	35.4564	46	-240	469	26.2081	71.097	0.422772	666296061	0.356758	1851.56	45.0888	22.082	2.79689	2.84558	0.2123	0.860939	0.201233	0.740623	0.170227	0.901143	0.900486	0.997906	0.981789	-0.509129	0.905345	0.192324	6.66562	0.266212	2.5495	0.875228	0.448047	13.3312	2.31555	0.764471	5.43177	16656.4	0.126362	43.177	47026
7981809	0	2.3	-14	66	12017751	1.66882	30	13.6769	97	30.1782	31.152	44	-325	422	14.2929	58.7233	-2.95941	12017751	0.390695	2537.7	68.1686	122.586	-14.5081	3.26628	0.468991	0.737585	0.361912	1.07554	0.331235	0.835427	0.829737	0.9944	0.964755	-0.322128	0.786993	0.281935	8.21389	0.238516	2.63435	0.791266	0.341604	16.4278	2.248	0.933818	5.91988	152.667	0.0438069	43.035	1361.57
[truncated: 804 more columns]
